# Supplementary material for: Constrained patterns of covariation and clustering of HIV-1 non-nucleoside reverse transcriptase inhibitor resistance mutations
Source: PubMed Central journal article supplement — J Antimicrob Chemother. 2010 May 12;65(7):1477–85. doi: 10.1093/jac/dkq140 (PMC2882873; doi:10.1093/jac/dkq140), 2010-05-12
Supplement: dkq140_1.pdf [file dkq140_1.pdf]

## Supplementary data

**Table S1.** Covariation between pairs of NNRTI-selected mutations, full dataset

| Mutation X   | Mutation Y   | Occurrences* |             |             | Association† |                   |                 |              |                |
|--------------|--------------|--------------|-------------|-------------|--------------|-------------------|-----------------|--------------|----------------|
|              |              | XY           | X only      | Y only      | J            | J <sub>RAND</sub> | J <sub>SE</sub> | Z            | p              |
| L100I        | Y181C        | 4            | 620         | 2680        | 0.00         | 0.04              | 0.00            | -67.57       | <2E-200        |
| V108I        | Y188L        | 1            | 1046        | 720         | 0.00         | 0.04              | 0.00            | -61.64       | <2E-200        |
| K101E        | K103N        | 37           | 781         | 5535        | 0.01         | 0.06              | 0.00            | -57.41       | <2E-200        |
| E138A        | Y181C        | 13           | 943         | 2665        | 0.00         | 0.06              | 0.00            | -55.76       | <2E-200        |
| K103N        | V106I        | 46           | 5522        | 762         | 0.01         | 0.06              | 0.00            | -49.09       | <2E-200        |
| L100I        | G190A        | 4            | 618         | 1897        | 0.00         | 0.04              | 0.00            | -46.88       | <2E-200        |
| K103N        | E138A        | 82           | 5501        | 856         | 0.01         | 0.07              | 0.00            | -39.40       | <2E-200        |
| K103N        | G190S        | 21           | 5571        | 329         | 0.00         | 0.03              | 0.00            | -30.13       | 2.0E-199       |
| K101P        | Y181C        | 3            | 236         | 2678        | 0.00         | 0.02              | 0.00            | -28.06       | 3.3E-173       |
| K103N        | Y188L        | 79           | 5503        | 629         | 0.01         | 0.05              | 0.00            | -27.83       | 1.7E-170       |
| K103N        | G190A        | 357          | 5079        | 1460        | 0.05         | 0.12              | 0.00            | -27.16       | 1.9E-162       |
| L100I        | E138A        | 3            | 622         | 955         | 0.00         | 0.03              | 0.00            | -25.93       | 2.8E-148       |
| V108I        | E138A        | 10           | 1035        | 947         | 0.01         | 0.04              | 0.00            | -23.05       | 1.5E-117       |
| K103N        | G190E        | 1            | 5594        | 52          | 0.00         | 0.00              | 0.00            | -22.54       | 1.7E-112       |
| L100I        | V106I        | 3            | 625         | 812         | 0.00         | 0.03              | 0.00            | -22.05       | 9.7E-108       |
| Y181C        | Y188L        | 35           | 2650        | 681         | 0.01         | 0.05              | 0.00            | -20.80       | 4.4E-96        |
| <b>Y181C</b> | <b>G190A</b> | <b>848</b>   | <b>1711</b> | <b>985</b>  | <b>0.24</b>  | <b>0.09</b>       | <b>0.01</b>     | <b>20.17</b> | <b>1.8E-90</b> |
| V106I        | K238T        | 1            | 815         | 299         | 0.00         | 0.02              | 0.00            | -18.42       | 9.0E-76        |
| <b>K101E</b> | <b>G190A</b> | <b>445</b>   | <b>347</b>  | <b>1367</b> | <b>0.21</b>  | <b>0.05</b>       | <b>0.01</b>     | <b>18.35</b> | <b>3.6E-75</b> |
| V90I         | K103N        | 234          | 835         | 5184        | 0.04         | 0.08              | 0.00            | -16.84       | 1.3E-63        |
| <i>K101H</i> | K103N        | 15           | 163         | 5577        | 0.00         | 0.01              | 0.00            | -16.81       | 2.1E-63        |
| V106I        | E138A        | 10           | 806         | 947         | 0.01         | 0.04              | 0.00            | -16.72       | 8.7E-63        |
| E138A        | G190A        | 41           | 905         | 1857        | 0.01         | 0.05              | 0.00            | -16.72       | 8.7E-63        |
| Y181C        | P225H        | 13           | 2661        | 321         | 0.00         | 0.02              | 0.00            | -16.70       | 1.2E-62        |
| <b>Y181C</b> | <b>H221Y</b> | <b>430</b>   | <b>2105</b> | <b>264</b>  | <b>0.15</b>  | <b>0.05</b>       | <b>0.01</b>     | <b>15.75</b> | <b>7.2E-56</b> |
| K101E        | V179D        | 5            | 819         | 597         | 0.00         | 0.03              | 0.00            | -15.60       | 7.7E-55        |
| Y188L        | G190A        | 30           | 684         | 1873        | 0.01         | 0.04              | 0.00            | -14.80       | 1.6E-49        |
| <b>V108I</b> | <b>H221Y</b> | <b>255</b>   | <b>743</b>  | <b>430</b>  | <b>0.18</b>  | <b>0.03</b>       | <b>0.01</b>     | <b>14.24</b> | <b>5.4E-46</b> |
| V90I         | A98G         | 22           | 1074        | 947         | 0.01         | 0.04              | 0.00            | -13.91       | 5.2E-44        |
| <b>L100I</b> | <b>K103N</b> | <b>571</b>   | <b>48</b>   | <b>4910</b> | <b>0.10</b>  | <b>0.05</b>       | <b>0.00</b>     | <b>13.90</b> | <b>6.7E-44</b> |
| V106A        | Y181C        | 6            | 176         | 2675        | 0.00         | 0.01              | 0.00            | -13.55       | 7.9E-42        |
| A98G         | V106A        | 1            | 970         | 181         | 0.00         | 0.01              | 0.00            | -12.88       | 5.8E-38        |
| E138A        | H221Y        | 12           | 940         | 706         | 0.01         | 0.03              | 0.00            | -12.61       | 1.8E-36        |
| V179D        | Y181C        | 45           | 548         | 2630        | 0.01         | 0.04              | 0.00            | -12.61       | 1.8E-36        |
| K103N        | Y181C        | 822          | 4586        | 1716        | 0.12         | 0.16              | 0.00            | -12.50       | 7.5E-36        |
| Y188L        | P225H        | 2            | 719         | 336         | 0.00         | 0.02              | 0.00            | -12.30       | 8.9E-35        |

|              |              |            |             |             |             |             |             |              |                |
|--------------|--------------|------------|-------------|-------------|-------------|-------------|-------------|--------------|----------------|
| K101E        | K103S        | 1          | 828         | 200         | 0.00        | 0.01        | 0.00        | -12.26       | 1.5E-34        |
| L100I        | K101E        | 8          | 620         | 819         | 0.01        | 0.03        | 0.00        | -12.07       | 1.4E-33        |
| V90I         | E138A        | 25         | 1075        | 927         | 0.01        | 0.04        | 0.00        | -12.06       | 1.6E-33        |
| L100I        | V108I        | 12         | 604         | 1031        | 0.01        | 0.03        | 0.00        | -11.89       | 1.3E-32        |
| <b>V108I</b> | <b>Y181C</b> | <b>424</b> | <b>589</b>  | <b>2116</b> | <b>0.14</b> | <b>0.06</b> | <b>0.01</b> | <b>11.85</b> | <b>2.2E-32</b> |
| A98G         | E138A        | 21         | 949         | 938         | 0.01        | 0.04        | 0.00        | -11.84       | 2.4E-32        |
| K103N        | V106A        | 24         | 5543        | 159         | 0.00        | 0.01        | 0.00        | -11.78       | 4.8E-32        |
| V179D        | H221Y        | 6          | 587         | 713         | 0.00        | 0.03        | 0.00        | -11.72       | 9.8E-32        |
| <b>V106A</b> | <b>F227L</b> | <b>96</b>  | <b>66</b>   | <b>128</b>  | <b>0.33</b> | <b>0.01</b> | <b>0.03</b> | <b>11.67</b> | <b>1.7E-31</b> |
| G190A        | P225H        | 12         | 1882        | 325         | 0.01        | 0.02        | 0.00        | -11.58       | 5.0E-31        |
| V106I        | Y181C        | 75         | 725         | 2560        | 0.02        | 0.05        | 0.00        | -11.50       | 1.4E-30        |
| V108I        | V179D        | 12         | 1034        | 588         | 0.01        | 0.03        | 0.00        | -11.41       | 3.8E-30        |
| L100I        | G190S        | 2          | 627         | 360         | 0.00        | 0.02        | 0.00        | -11.40       | 4.0E-30        |
| K101P        | E138A        | 2          | 238         | 959         | 0.00        | 0.02        | 0.00        | -11.31       | 1.1E-29        |
| V90I         | V106I        | 21         | 1076        | 785         | 0.01        | 0.04        | 0.00        | -11.21       | 3.8E-29        |
| V106I        | V108I        | 20         | 787         | 1016        | 0.01        | 0.04        | 0.00        | -11.09       | 1.4E-28        |
| <b>K101E</b> | <b>Y181C</b> | <b>351</b> | <b>444</b>  | <b>2258</b> | <b>0.11</b> | <b>0.05</b> | <b>0.01</b> | <b>11.01</b> | <b>3.4E-28</b> |
| K101E        | V106A        | 1          | 828         | 180         | 0.00        | 0.01        | 0.00        | -10.90       | 1.2E-27        |
| <b>K101E</b> | <b>G190S</b> | <b>133</b> | <b>672</b>  | <b>194</b>  | <b>0.13</b> | <b>0.02</b> | <b>0.01</b> | <b>10.66</b> | <b>1.6E-26</b> |
| Y188L        | K238T        | 2          | 719         | 298         | 0.00        | 0.02        | 0.00        | -10.52       | 7.3E-26        |
| Y181C        | G190E        | 1          | 2683        | 53          | 0.00        | 0.00        | 0.00        | -10.42       | 1.9E-25        |
| A98G         | V179D        | 12         | 953         | 592         | 0.01        | 0.03        | 0.00        | -9.97        | 2.1E-23        |
| V108I        | G190S        | 6          | 1038        | 350         | 0.00        | 0.02        | 0.00        | -9.94        | 2.8E-23        |
| L100I        | V179D        | 6          | 620         | 597         | 0.00        | 0.02        | 0.00        | -9.85        | 7.1E-23        |
| <b>K103N</b> | <b>P225H</b> | <b>301</b> | <b>5118</b> | <b>30</b>   | <b>0.06</b> | <b>0.03</b> | <b>0.00</b> | <b>9.56</b>  | <b>1.2E-21</b> |
| V106A        | Y188L        | 1          | 184         | 722         | 0.00        | 0.01        | 0.00        | -9.51        | 1.9E-21        |
| K103N        | F227L        | 41         | 5525        | 181         | 0.01        | 0.02        | 0.00        | -9.09        | 9.7E-20        |
| A98G         | K101P        | 3          | 970         | 237         | 0.00        | 0.02        | 0.00        | -8.98        | 2.8E-19        |
| V90I         | Y181C        | 135        | 947         | 2493        | 0.04        | 0.07        | 0.00        | -8.83        | 1.0E-18        |
| V90I         | V179D        | 17         | 1080        | 583         | 0.01        | 0.03        | 0.00        | -8.78        | 1.6E-18        |
| <b>K101H</b> | <b>G190A</b> | <b>116</b> | <b>58</b>   | <b>1766</b> | <b>0.06</b> | <b>0.01</b> | <b>0.01</b> | <b>8.74</b>  | <b>2.4E-18</b> |
| G190S        | P225H        | 1          | 360         | 337         | 0.00        | 0.01        | 0.00        | -8.57        | 1.0E-17        |
| <b>K103S</b> | <b>G190A</b> | <b>117</b> | <b>76</b>   | <b>1753</b> | <b>0.06</b> | <b>0.01</b> | <b>0.01</b> | <b>8.55</b>  | <b>1.2E-17</b> |
| V90I         | V106M        | 2          | 1099        | 158         | 0.00        | 0.01        | 0.00        | -8.54        | 1.4E-17        |
| K103S        | V179D        | 1          | 200         | 604         | 0.00        | 0.01        | 0.00        | -8.51        | 1.8E-17        |
| V90I         | G190A        | 89         | 991         | 1779        | 0.03        | 0.06        | 0.00        | -8.49        | 2.1E-17        |
| A98G         | K103N        | 282        | 651         | 5222        | 0.05        | 0.07        | 0.00        | -8.35        | 6.6E-17        |
| V106M        | V108I        | 2          | 161         | 1044        | 0.00        | 0.01        | 0.00        | -8.35        | 7.0E-17        |
| V179D        | G190S        | 3          | 602         | 356         | 0.00        | 0.02        | 0.00        | -8.26        | 1.5E-16        |
| K103N        | V179D        | 0          | 5590        | 603         | 0.00        | 0.05        | 0.00        | NA           | 2.2E-16        |
| E138A        | F227L        | 3          | 955         | 225         | 0.00        | 0.01        | 0.00        | -8.11        | 5.2E-16        |
| V106I        | G190A        | 61         | 746         | 1798        | 0.02        | 0.05        | 0.00        | -7.95        | 1.8E-15        |

|              |              |            |             |             |             |             |             |             |                |
|--------------|--------------|------------|-------------|-------------|-------------|-------------|-------------|-------------|----------------|
| E138A        | Y188L        | 20         | 940         | 701         | 0.01        | 0.03        | 0.00        | -7.79       | 6.5E-15        |
| K103S        | V106I        | 2          | 197         | 812         | 0.00        | 0.01        | 0.00        | -7.69       | 1.4E-14        |
| Y181C        | K238T        | 25         | 2647        | 266         | 0.01        | 0.02        | 0.00        | -7.66       | 1.9E-14        |
| <b>A98G</b>  | <b>Y181C</b> | <b>319</b> | <b>617</b>  | <b>2311</b> | <b>0.10</b> | <b>0.06</b> | <b>0.01</b> | <b>7.63</b> | <b>2.3E-14</b> |
| V106M        | Y181C        | 11         | 153         | 2670        | 0.00        | 0.01        | 0.00        | -7.28       | 3.4E-13        |
| L100I        | V106M        | 1          | 628         | 163         | 0.00        | 0.01        | 0.00        | -7.13       | 1.0E-12        |
| K103N        | Y181V        | 9          | 5590        | 59          | 0.00        | 0.01        | 0.00        | -7.09       | 1.3E-12        |
| V90I         | K101E        | 33         | 1064        | 778         | 0.02        | 0.04        | 0.00        | -6.96       | 3.4E-12        |
| <b>V106I</b> | <b>Y188L</b> | <b>110</b> | <b>705</b>  | <b>579</b>  | <b>0.08</b> | <b>0.03</b> | <b>0.01</b> | <b>6.79</b> | <b>1.1E-11</b> |
| V90I         | Y181I        | 2          | 1098        | 131         | 0.00        | 0.01        | 0.00        | -6.75       | 1.5E-11        |
| Y181I        | Y188L        | 1          | 134         | 722         | 0.00        | 0.01        | 0.00        | -6.64       | 3.1E-11        |
| <b>K103N</b> | <b>K238T</b> | <b>219</b> | <b>5245</b> | <b>69</b>   | <b>0.04</b> | <b>0.02</b> | <b>0.00</b> | <b>6.57</b> | <b>5.1E-11</b> |
| L100I        | F227L        | 2          | 626         | 226         | 0.00        | 0.01        | 0.00        | -6.52       | 6.9E-11        |
| K103N        | <i>I178F</i> | 2          | 5595        | 23          | 0.00        | 0.00        | 0.00        | -6.42       | 1.4E-10        |
| V106I        | P225H        | 0          | 815         | 337         | 0.00        | 0.02        | 0.00        | NA          | 1.4E-10        |
| V90I         | L100I        | 23         | 1074        | 583         | 0.01        | 0.03        | 0.00        | -6.41       | 1.4E-10        |
| Y188L        | G190S        | 0          | 722         | 361         | 0.00        | 0.02        | 0.00        | NA          | 7.4E-10        |
| K103S        | Y181C        | 17         | 180         | 2653        | 0.01        | 0.01        | 0.00        | -6.08       | 1.2E-9         |
| K103N        | G190Q        | 0          | 5598        | 35          | 0.00        | 0.00        | 0.00        | NA          | 1.3E-9         |
| V90I         | Y188L        | 30         | 1069        | 676         | 0.02        | 0.04        | 0.00        | -5.95       | 2.6E-9         |
| V179D        | P225H        | 4          | 599         | 332         | 0.00        | 0.02        | 0.00        | -5.95       | 2.7E-9         |
| K101E        | Y188L        | 20         | 807         | 687         | 0.01        | 0.03        | 0.00        | -5.93       | 3.0E-9         |
| V179D        | G190A        | 49         | 540         | 1845        | 0.02        | 0.04        | 0.00        | -5.91       | 3.5E-9         |
| <b>K101H</b> | <b>Y181C</b> | <b>91</b>  | <b>84</b>   | <b>2573</b> | <b>0.03</b> | <b>0.01</b> | <b>0.00</b> | <b>5.84</b> | <b>5.2E-9</b>  |
| K103N        | <i>D237E</i> | 35         | 5538        | 121         | 0.01        | 0.01        | 0.00        | -5.84       | 5.2E-9         |
| L100I        | Y188L        | 14         | 615         | 701         | 0.01        | 0.03        | 0.00        | -5.82       | 5.9E-9         |
| V106A        | V108I        | 4          | 180         | 1041        | 0.00        | 0.01        | 0.00        | -5.81       | 6.1E-9         |
| K101E        | P225H        | 7          | 820         | 329         | 0.01        | 0.02        | 0.00        | -5.81       | 6.4E-9         |
| <b>A98G</b>  | <b>V108I</b> | <b>139</b> | <b>791</b>  | <b>887</b>  | <b>0.08</b> | <b>0.04</b> | <b>0.01</b> | <b>5.72</b> | <b>1.1E-8</b>  |
| G190A        | M230L        | 5          | 1900        | 111         | 0.00        | 0.01        | 0.00        | -5.71       | 1.1E-8         |
| <b>G190A</b> | <b>H221Y</b> | <b>174</b> | <b>1671</b> | <b>524</b>  | <b>0.07</b> | <b>0.04</b> | <b>0.01</b> | <b>5.71</b> | <b>1.2E-8</b>  |
| K101P        | V108I        | 6          | 229         | 1039        | 0.00        | 0.02        | 0.00        | -5.67       | 1.5E-8         |
| E138A        | P225H        | 9          | 951         | 329         | 0.01        | 0.02        | 0.00        | -5.57       | 2.6E-8         |
| <b>A98G</b>  | <b>G190A</b> | <b>215</b> | <b>731</b>  | <b>1657</b> | <b>0.08</b> | <b>0.05</b> | <b>0.01</b> | <b>5.52</b> | <b>3.3E-8</b>  |
| Y188L        | M230L        | 1          | 721         | 115         | 0.00        | 0.01        | 0.00        | -5.47       | 4.4E-8         |
| K103N        | V179T        | 13         | 5574        | 60          | 0.00        | 0.01        | 0.00        | -5.40       | 6.8E-8         |
| E138A        | V179D        | 21         | 936         | 583         | 0.01        | 0.03        | 0.00        | -5.37       | 7.7E-8         |
| G190S        | F227L        | 1          | 360         | 226         | 0.00        | 0.01        | 0.00        | -5.36       | 8.4E-8         |
| <b>G190A</b> | <b>F227L</b> | <b>79</b>  | <b>1797</b> | <b>144</b>  | <b>0.04</b> | <b>0.02</b> | <b>0.00</b> | <b>5.33</b> | <b>1.0E-7</b>  |
| K103S        | E138A        | 0          | 201         | 960         | 0.00        | 0.01        | 0.00        | NA          | 1.6E-7         |
| E138A        | <i>D237E</i> | 3          | 956         | 158         | 0.00        | 0.01        | 0.00        | -5.18       | 2.2E-7         |
| <b>V108I</b> | <b>G190A</b> | <b>221</b> | <b>798</b>  | <b>1606</b> | <b>0.08</b> | <b>0.06</b> | <b>0.01</b> | <b>5.10</b> | <b>3.4E-7</b>  |

|              |              |            |             |             |             |             |             |             |               |
|--------------|--------------|------------|-------------|-------------|-------------|-------------|-------------|-------------|---------------|
| <b>V106M</b> | <b>V179D</b> | <b>37</b>  | <b>122</b>  | <b>567</b>  | <b>0.05</b> | <b>0.01</b> | <b>0.01</b> | <b>5.05</b> | <b>4.5E-7</b> |
| K103N        | Y181I        | 30         | 5564        | 99          | 0.01        | 0.01        | 0.00        | -5.01       | 5.5E-7        |
| <b>K101E</b> | <b>V108I</b> | <b>116</b> | <b>679</b>  | <b>912</b>  | <b>0.07</b> | <b>0.04</b> | <b>0.01</b> | <b>4.98</b> | <b>6.4E-7</b> |
| <i>K101H</i> | E138A        | 0          | 181         | 960         | 0.00        | 0.01        | 0.00        | NA          | 8.0E-7        |
| V106A        | E138A        | 4          | 180         | 955         | 0.00        | 0.01        | 0.00        | -4.88       | 1.1E-6        |
| V90I         | <i>K101H</i> | 5          | 1095        | 176         | 0.00        | 0.01        | 0.00        | -4.87       | 1.1E-6        |
| K101P        | V179D        | 3          | 236         | 602         | 0.00        | 0.01        | 0.00        | -4.78       | 1.7E-6        |
| A98G         | V106M        | 0          | 970         | 164         | 0.00        | 0.01        | 0.00        | NA          | 2.3E-6        |
| K101E        | K238T        | 7          | 818         | 289         | 0.01        | 0.02        | 0.00        | -4.71       | 2.4E-6        |
| E138A        | M230L        | 2          | 960         | 114         | 0.00        | 0.01        | 0.00        | -4.70       | 2.6E-6        |
| V90I         | Y181V        | 1          | 1101        | 65          | 0.00        | 0.00        | 0.00        | -4.68       | 2.8E-6        |
| G190S        | K238T        | 2          | 357         | 297         | 0.00        | 0.01        | 0.00        | -4.59       | 4.5E-6        |
| V90I         | H221Y        | 36         | 1053        | 669         | 0.02        | 0.04        | 0.00        | -4.59       | 4.5E-6        |
| L100I        | K101P        | 0          | 627         | 240         | 0.00        | 0.01        | 0.00        | NA          | 5.4E-6        |
| <b>Y181C</b> | <b>G190S</b> | <b>120</b> | <b>2547</b> | <b>224</b>  | <b>0.04</b> | <b>0.02</b> | <b>0.00</b> | <b>4.53</b> | <b>5.8E-6</b> |
| V90I         | K238T        | 11         | 1085        | 283         | 0.01        | 0.02        | 0.00        | -4.50       | 6.9E-6        |
| K103S        | Y188L        | 0          | 201         | 722         | 0.00        | 0.01        | 0.00        | NA          | 8.7E-6        |
| L100I        | K238T        | 5          | 621         | 294         | 0.01        | 0.02        | 0.00        | -4.44       | 9.0E-6        |
| E138A        | G190S        | 12         | 947         | 350         | 0.01        | 0.02        | 0.00        | -4.42       | 9.7E-6        |
| Y181C        | Y188H        | 2          | 2681        | 37          | 0.00        | 0.00        | 0.00        | -4.42       | 9.9E-6        |
| Y188L        | H221Y        | 21         | 685         | 696         | 0.01        | 0.03        | 0.00        | -4.34       | 1.4E-5        |
| K103N        | G190C        | 0          | 5598        | 19          | 0.00        | 0.00        | 0.00        | NA          | 1.5E-5        |
| <b>K101P</b> | <b>K103S</b> | <b>24</b>  | <b>207</b>  | <b>175</b>  | <b>0.06</b> | <b>0.01</b> | <b>0.01</b> | <b>4.33</b> | <b>1.5E-5</b> |
| V90I         | <i>K223T</i> | 1          | 1100        | 60          | 0.00        | 0.00        | 0.00        | -4.31       | 1.6E-5        |
| <b>V108I</b> | <b>F227L</b> | <b>46</b>  | <b>980</b>  | <b>175</b>  | <b>0.04</b> | <b>0.01</b> | <b>0.01</b> | <b>4.26</b> | <b>2.1E-5</b> |
| E138Q        | Y181C        | 6          | 70          | 2666        | 0.00        | 0.01        | 0.00        | -4.19       | 2.8E-5        |
| <b>H221Y</b> | <b>F227L</b> | <b>37</b>  | <b>673</b>  | <b>186</b>  | <b>0.04</b> | <b>0.01</b> | <b>0.01</b> | <b>4.15</b> | <b>3.3E-5</b> |
| Y181C        | Y318F        | 3          | 2683        | 45          | 0.00        | 0.00        | 0.00        | -4.12       | 3.7E-5        |
| K103N        | V106M        | 43         | 5544        | 114         | 0.01        | 0.01        | 0.00        | -4.10       | 4.1E-5        |
| V108I        | P225H        | 13         | 1023        | 312         | 0.01        | 0.02        | 0.00        | -4.04       | 5.3E-5        |
| V90I         | V108I        | 61         | 1026        | 961         | 0.03        | 0.04        | 0.00        | -4.00       | 6.3E-5        |
| H221Y        | P225H        | 8          | 707         | 325         | 0.01        | 0.02        | 0.00        | -3.97       | 7.1E-5        |
| <b>V179F</b> | <b>Y181C</b> | <b>25</b>  | <b>1</b>    | <b>2648</b> | <b>0.01</b> | <b>0.00</b> | <b>0.00</b> | <b>3.94</b> | <b>8.3E-5</b> |
| V90I         | K103S        | 7          | 1091        | 192         | 0.01        | 0.01        | 0.00        | -3.92       | 8.8E-5        |
| L100I        | V106A        | 0          | 629         | 184         | 0.00        | 0.01        | 0.00        | NA          | 9.0E-5        |
| L100I        | <i>K101H</i> | 0          | 629         | 182         | 0.00        | 0.01        | 0.00        | NA          | 1.0E-4        |
| L100I        | <i>T139R</i> | 1          | 627         | 98          | 0.00        | 0.01        | 0.00        | -3.89       | 1.0E-4        |
| K103N        | P236L        | 4          | 5594        | 22          | 0.00        | 0.00        | 0.00        | -3.80       | 1.4E-4        |
| <i>K101H</i> | V179D        | 0          | 182         | 605         | 0.00        | 0.01        | 0.00        | NA          | 1.5E-4        |
| K101N        | K103N        | 8          | 34          | 5580        | 0.00        | 0.00        | 0.00        | -3.77       | 1.6E-4        |
| <b>K102N</b> | <b>G190A</b> | <b>26</b>  | <b>21</b>   | <b>1868</b> | <b>0.01</b> | <b>0.00</b> | <b>0.00</b> | <b>3.75</b> | <b>1.8E-4</b> |
| Y181C        | G190Q        | 0          | 2685        | 35          | 0.00        | 0.00        | 0.00        | NA          | 2.4E-4        |

|              |              |    |      |      |      |      |      |       |        |
|--------------|--------------|----|------|------|------|------|------|-------|--------|
| V106M        | G190S        | 1  | 163  | 361  | 0.00 | 0.01 | 0.00 | -3.64 | 2.7E-4 |
| K103S        | V108I        | 7  | 191  | 1035 | 0.01 | 0.01 | 0.00 | -3.63 | 2.9E-4 |
| A98G         | K101E        | 95 | 863  | 723  | 0.06 | 0.04 | 0.01 | 3.60  | 3.1E-4 |
| <i>K101H</i> | G190S        | 21 | 160  | 332  | 0.04 | 0.01 | 0.01 | 3.60  | 3.1E-4 |
| V106M        | H221Y        | 3  | 159  | 715  | 0.00 | 0.01 | 0.00 | -3.58 | 3.5E-4 |
| E138A        | <i>T139R</i> | 0  | 962  | 100  | 0.00 | 0.01 | 0.00 | NA    | 4.4E-4 |
| E138A        | K238T        | 11 | 948  | 288  | 0.01 | 0.02 | 0.00 | -3.50 | 4.7E-4 |
| V108I        | G190E        | 1  | 1046 | 52   | 0.00 | 0.00 | 0.00 | -3.47 | 5.2E-4 |
| Y188L        | F227L        | 5  | 712  | 223  | 0.01 | 0.01 | 0.00 | -3.46 | 5.3E-4 |
| V90I         | V106A        | 7  | 1092 | 177  | 0.01 | 0.01 | 0.00 | -3.42 | 6.2E-4 |
| V106I        | V179D        | 22 | 792  | 568  | 0.02 | 0.03 | 0.00 | -3.41 | 6.4E-4 |
| V106A        | K238T        | 1  | 184  | 299  | 0.00 | 0.01 | 0.00 | -3.35 | 8.1E-4 |
| V106M        | P225H        | 1  | 163  | 337  | 0.00 | 0.01 | 0.00 | -3.34 | 8.3E-4 |
| A98G         | L100I        | 30 | 936  | 594  | 0.02 | 0.03 | 0.00 | -3.33 | 8.6E-4 |
| K103H        | G190A        | 15 | 0    | 1883 | 0.01 | 0.00 | 0.00 | 3.30  | 9.5E-4 |
| V106I        | H221Y        | 29 | 779  | 679  | 0.02 | 0.03 | 0.00 | -3.28 | 0.001  |
| V90I         | V179T        | 0  | 1100 | 75   | 0.00 | 0.01 | 0.00 | NA    | 0.001  |
| A98G         | V106I        | 41 | 915  | 771  | 0.02 | 0.04 | 0.00 | -3.26 | 0.001  |
| V90I         | G190S        | 17 | 1081 | 330  | 0.01 | 0.02 | 0.00 | -3.24 | 0.001  |
| K101N        | Y181C        | 25 | 18   | 2645 | 0.01 | 0.00 | 0.00 | 3.19  | 0.001  |
| V106I        | Y181I        | 3  | 813  | 129  | 0.00 | 0.01 | 0.00 | -3.19 | 0.001  |
| K101P        | P225H        | 0  | 239  | 338  | 0.00 | 0.01 | 0.00 | NA    | 0.002  |
| <i>I94L</i>  | V106I        | 1  | 64   | 814  | 0.00 | 0.00 | 0.00 | -3.16 | 0.002  |
| V108I        | V179T        | 2  | 1044 | 74   | 0.00 | 0.01 | 0.00 | -3.13 | 0.002  |
| A98G         | P225H        | 14 | 958  | 318  | 0.01 | 0.02 | 0.00 | -3.13 | 0.002  |
| V106M        | F227L        | 14 | 133  | 214  | 0.04 | 0.01 | 0.01 | 3.11  | 0.002  |
| Y181C        | <i>L234I</i> | 0  | 2687 | 26   | 0.00 | 0.00 | 0.00 | NA    | 0.002  |
| V106I        | <i>T139R</i> | 2  | 814  | 98   | 0.00 | 0.01 | 0.00 | -3.09 | 0.002  |
| V90I         | F227L        | 10 | 1088 | 214  | 0.01 | 0.02 | 0.00 | -3.08 | 0.002  |
| A98G         | E138Q        | 0  | 972  | 77   | 0.00 | 0.01 | 0.00 | NA    | 0.002  |
| Y181C        | Y188C        | 0  | 2686 | 25   | 0.00 | 0.00 | 0.00 | NA    | 0.003  |
| K103N        | M230L        | 77 | 5505 | 39   | 0.01 | 0.01 | 0.00 | 3.01  | 0.003  |
| <i>I94L</i>  | A98G         | 17 | 47   | 949  | 0.02 | 0.00 | 0.00 | 3.01  | 0.003  |
| P225H        | F227L        | 2  | 336  | 226  | 0.00 | 0.01 | 0.00 | -2.99 | 0.003  |
| V90I         | P225H        | 17 | 1076 | 315  | 0.01 | 0.02 | 0.00 | -2.96 | 0.003  |
| K103H        | Y181C        | 14 | 1    | 2667 | 0.01 | 0.00 | 0.00 | 2.90  | 0.004  |
| V106M        | K238T        | 1  | 163  | 299  | 0.00 | 0.01 | 0.00 | -2.86 | 0.004  |
| K103S        | P225H        | 0  | 199  | 337  | 0.00 | 0.01 | 0.00 | NA    | 0.005  |
| Y181I        | G190S        | 1  | 132  | 361  | 0.00 | 0.01 | 0.00 | -2.82 | 0.005  |
| Y181V        | Y188L        | 1  | 68   | 722  | 0.00 | 0.00 | 0.00 | -2.82 | 0.005  |
| G190A        | <i>D237E</i> | 41 | 1840 | 116  | 0.02 | 0.01 | 0.00 | 2.82  | 0.005  |
| E138A        | Y181V        | 0  | 962  | 69   | 0.00 | 0.00 | 0.00 | NA    | 0.005  |

|       |       |    |      |      |      |      |      |       |      |
|-------|-------|----|------|------|------|------|------|-------|------|
| V106A | G190S | 0  | 184  | 361  | 0.00 | 0.01 | 0.00 | NA    | 0.01 |
| V179F | G190A | 14 | 10   | 1882 | 0.01 | 0.00 | 0.00 | 2.78  | 0.01 |
| A98G  | K102N | 1  | 971  | 48   | 0.00 | 0.00 | 0.00 | -2.76 | 0.01 |
| E138A | K223T | 0  | 962  | 65   | 0.00 | 0.00 | 0.00 | NA    | 0.01 |
| K101H | V108I | 29 | 148  | 1014 | 0.02 | 0.01 | 0.00 | 2.70  | 0.01 |
| V108I | K223T | 15 | 1026 | 43   | 0.01 | 0.00 | 0.00 | 2.70  | 0.01 |
| Y188H | G190A | 2  | 36   | 1898 | 0.00 | 0.00 | 0.00 | -2.67 | 0.01 |
| K101H | P225H | 0  | 181  | 337  | 0.00 | 0.01 | 0.00 | NA    | 0.01 |
| V106A | G190A | 44 | 134  | 1850 | 0.02 | 0.01 | 0.00 | 2.66  | 0.01 |
| V90I  | G190E | 0  | 1101 | 53   | 0.00 | 0.00 | 0.00 | NA    | 0.01 |
| H221Y | K223T | 1  | 718  | 62   | 0.00 | 0.00 | 0.00 | -2.64 | 0.01 |
| K102N | E138A | 1  | 48   | 961  | 0.00 | 0.00 | 0.00 | -2.63 | 0.01 |
| V179D | D237E | 3  | 599  | 157  | 0.00 | 0.01 | 0.00 | -2.63 | 0.01 |
| M230L | L234I | 7  | 107  | 20   | 0.05 | 0.00 | 0.02 | 2.61  | 0.01 |
| V106M | Y188L | 4  | 160  | 718  | 0.00 | 0.01 | 0.00 | -2.61 | 0.01 |
| T139R | H221Y | 2  | 96   | 717  | 0.00 | 0.01 | 0.00 | -2.59 | 0.01 |
| T139R | Y188L | 2  | 98   | 719  | 0.00 | 0.01 | 0.00 | -2.58 | 0.01 |
| K103S | F227L | 1  | 200  | 225  | 0.00 | 0.01 | 0.00 | -2.57 | 0.01 |
| V106M | Y188C | 7  | 153  | 19   | 0.04 | 0.00 | 0.01 | 2.57  | 0.01 |
| S105T | V106A | 7  | 17   | 174  | 0.04 | 0.00 | 0.01 | 2.56  | 0.01 |
| I178F | Y181C | 2  | 24   | 2685 | 0.00 | 0.00 | 0.00 | -2.56 | 0.01 |
| K101N | G190A | 17 | 27   | 1875 | 0.01 | 0.00 | 0.00 | 2.54  | 0.01 |
| K103H | H221Y | 8  | 7    | 711  | 0.01 | 0.00 | 0.00 | 2.54  | 0.01 |
| Y188L | D237E | 20 | 696  | 142  | 0.02 | 0.01 | 0.01 | 2.51  | 0.01 |
| G190A | L234I | 0  | 1905 | 27   | 0.00 | 0.00 | 0.00 | NA    | 0.01 |
| K101P | V106A | 1  | 237  | 183  | 0.00 | 0.01 | 0.00 | -2.47 | 0.01 |
| Y188C | G190A | 0  | 26   | 1905 | 0.00 | 0.00 | 0.00 | NA    | 0.01 |
| Y181C | M230L | 15 | 2671 | 100  | 0.01 | 0.01 | 0.00 | -2.45 | 0.01 |
| L100I | Y181V | 1  | 628  | 68   | 0.00 | 0.00 | 0.00 | -2.42 | 0.02 |
| K101E | G190C | 8  | 818  | 11   | 0.01 | 0.00 | 0.00 | 2.40  | 0.02 |
| K101E | Y181V | 13 | 816  | 56   | 0.01 | 0.01 | 0.00 | 2.39  | 0.02 |
| K103S | K238T | 13 | 185  | 282  | 0.03 | 0.01 | 0.01 | 2.38  | 0.02 |
| F227L | K238T | 2  | 225  | 297  | 0.00 | 0.01 | 0.00 | -2.36 | 0.02 |
| T139R | Y181C | 34 | 63   | 2642 | 0.01 | 0.01 | 0.00 | 2.33  | 0.02 |
| V106I | F227L | 8  | 808  | 217  | 0.01 | 0.01 | 0.00 | -2.33 | 0.02 |
| I178F | G190A | 12 | 15   | 1890 | 0.01 | 0.00 | 0.00 | 2.32  | 0.02 |
| A98G  | K238N | 0  | 974  | 49   | 0.00 | 0.00 | 0.00 | NA    | 0.02 |
| E138A | K238N | 0  | 961  | 50   | 0.00 | 0.00 | 0.00 | NA    | 0.02 |
| V90I  | K101P | 12 | 1088 | 214  | 0.01 | 0.02 | 0.00 | -2.30 | 0.02 |
| D237E | K238T | 0  | 162  | 299  | 0.00 | 0.01 | 0.00 | NA    | 0.02 |
| V108I | K238N | 12 | 1031 | 37   | 0.01 | 0.00 | 0.00 | 2.30  | 0.02 |
| K101H | Q242L | 6  | 175  | 33   | 0.03 | 0.00 | 0.01 | 2.25  | 0.02 |

|              |              |     |      |      |      |      |      |       |      |
|--------------|--------------|-----|------|------|------|------|------|-------|------|
| K103N        | Y188C        | 6   | 5583 | 20   | 0.00 | 0.00 | 0.00 | -2.24 | 0.03 |
| G190S        | M230L        | 1   | 361  | 115  | 0.00 | 0.01 | 0.00 | -2.23 | 0.03 |
| V106M        | G190A        | 37  | 121  | 1856 | 0.02 | 0.01 | 0.00 | 2.22  | 0.03 |
| Y181I        | P225H        | 0   | 135  | 338  | 0.00 | 0.01 | 0.00 | NA    | 0.03 |
| K103N        | <i>T139R</i> | 31  | 5549 | 67   | 0.01 | 0.01 | 0.00 | -2.21 | 0.03 |
| K101E        | G190E        | 0   | 829  | 53   | 0.00 | 0.00 | 0.00 | NA    | 0.03 |
| V90I         | Y188H        | 0   | 1101 | 39   | 0.00 | 0.00 | 0.00 | NA    | 0.03 |
| V106I        | G190E        | 0   | 815  | 54   | 0.00 | 0.00 | 0.00 | NA    | 0.03 |
| K103N        | E138Q        | 47  | 5516 | 26   | 0.01 | 0.01 | 0.00 | 2.17  | 0.03 |
| A98G         | G190S        | 18  | 947  | 339  | 0.01 | 0.02 | 0.00 | -2.16 | 0.03 |
| V108I        | Y188H        | 0   | 1047 | 39   | 0.00 | 0.00 | 0.00 | NA    | 0.03 |
| K103S        | H221Y        | 6   | 190  | 703  | 0.01 | 0.01 | 0.00 | -2.13 | 0.03 |
| V179D        | M230L        | 13  | 592  | 103  | 0.02 | 0.01 | 0.01 | 2.12  | 0.03 |
| V90I         | <i>Q242L</i> | 0   | 1102 | 37   | 0.00 | 0.00 | 0.00 | NA    | 0.03 |
| Y181C        | <i>H221C</i> | 10  | 2671 | 6    | 0.00 | 0.00 | 0.00 | 2.10  | 0.04 |
| <i>K102N</i> | V106I        | 1   | 48   | 815  | 0.00 | 0.00 | 0.00 | -2.09 | 0.04 |
| V179D        | Y181V        | 0   | 605  | 69   | 0.00 | 0.00 | 0.00 | NA    | 0.04 |
| K101E        | <i>K102N</i> | 0   | 829  | 49   | 0.00 | 0.00 | 0.00 | NA    | 0.04 |
| K101E        | Y318F        | 0   | 830  | 49   | 0.00 | 0.00 | 0.00 | NA    | 0.04 |
| V106I        | <i>K238N</i> | 0   | 814  | 50   | 0.00 | 0.00 | 0.00 | NA    | 0.04 |
| <i>S105T</i> | F227L        | 5   | 18   | 219  | 0.02 | 0.00 | 0.01 | 2.07  | 0.04 |
| K103N        | V108I        | 482 | 4832 | 534  | 0.08 | 0.08 | 0.00 | 2.06  | 0.04 |
| V106I        | V179T        | 2   | 814  | 74   | 0.00 | 0.01 | 0.00 | -2.06 | 0.04 |
| V179D        | <i>K223T</i> | 1   | 604  | 64   | 0.00 | 0.00 | 0.00 | -2.06 | 0.04 |
| K101E        | V179T        | 2   | 825  | 74   | 0.00 | 0.01 | 0.00 | -2.06 | 0.04 |
| Y181I        | K238T        | 0   | 135  | 300  | 0.00 | 0.01 | 0.00 | NA    | 0.04 |
| G190E        | H221Y        | 0   | 54   | 719  | 0.00 | 0.00 | 0.00 | NA    | 0.04 |
| V179D        | G190Q        | 7   | 598  | 27   | 0.01 | 0.00 | 0.00 | 2.03  | 0.04 |
| <i>I94L</i>  | K103N        | 19  | 44   | 5568 | 0.00 | 0.00 | 0.00 | -2.03 | 0.04 |
| L100I        | <i>D237E</i> | 4   | 622  | 158  | 0.01 | 0.01 | 0.00 | -2.03 | 0.04 |
| K101N        | K103H        | 4   | 41   | 11   | 0.07 | 0.00 | 0.04 | 2.01  | 0.04 |
| K103N        | <i>Q242L</i> | 10  | 5585 | 27   | 0.00 | 0.00 | 0.00 | -2.01 | 0.04 |
| V106I        | E138Q        | 2   | 813  | 75   | 0.00 | 0.01 | 0.00 | -2.01 | 0.04 |
| E138Q        | K238T        | 7   | 69   | 289  | 0.02 | 0.00 | 0.01 | 2.00  | 0.05 |
| Y188L        | G190E        | 0   | 723  | 54   | 0.00 | 0.00 | 0.00 | NA    | 0.05 |
| K101P        | V106M        | 0   | 240  | 164  | 0.00 | 0.01 | 0.00 | NA    | 0.05 |
| K103H        | V108I        | 6   | 8    | 1041 | 0.01 | 0.00 | 0.00 | 2.00  | 0.05 |
| A98G         | Y188H        | 0   | 972  | 39   | 0.00 | 0.00 | 0.00 | NA    | 0.05 |
| V90I         | G190Q        | 1   | 1101 | 34   | 0.00 | 0.00 | 0.00 | -1.99 | 0.05 |
| <i>I94L</i>  | V179D        | 0   | 64   | 604  | 0.00 | 0.00 | 0.00 | NA    | 0.05 |
| K101E        | H221Y        | 60  | 742  | 645  | 0.04 | 0.03 | 0.01 | 1.99  | 0.05 |
| V108I        | G190Q        | 0   | 1047 | 35   | 0.00 | 0.00 | 0.00 | NA    | 0.05 |

|              |              |    |      |      |      |      |      |       |      |
|--------------|--------------|----|------|------|------|------|------|-------|------|
| K101P        | <i>D237E</i> | 0  | 239  | 162  | 0.00 | 0.01 | 0.00 | NA    | 0.05 |
| <i>I94L</i>  | E138A        | 2  | 63   | 960  | 0.00 | 0.00 | 0.00 | -1.97 | 0.05 |
| E138A        | Y188H        | 0  | 960  | 39   | 0.00 | 0.00 | 0.00 | NA    | 0.05 |
| V179D        | Y188L        | 46 | 556  | 668  | 0.04 | 0.03 | 0.01 | 1.96  | 0.05 |
| K103N        | <i>L234I</i> | 21 | 5565 | 6    | 0.00 | 0.00 | 0.00 | 1.96  | 0.05 |
| Y188L        | <i>Y232H</i> | 6  | 714  | 17   | 0.01 | 0.00 | 0.00 | 1.94  | 0.05 |
| <i>K101H</i> | K103S        | 0  | 181  | 201  | 0.00 | 0.01 | 0.00 | NA    | 0.06 |
| <i>T139R</i> | G190S        | 0  | 100  | 361  | 0.00 | 0.01 | 0.00 | NA    | 0.06 |
| V106M        | M230L        | 6  | 158  | 110  | 0.02 | 0.01 | 0.01 | 1.88  | 0.06 |
| Y181C        | <i>Y232H</i> | 2  | 2683 | 20   | 0.00 | 0.00 | 0.00 | -1.87 | 0.06 |
| Y181C        | <i>V241M</i> | 8  | 2675 | 5    | 0.00 | 0.00 | 0.00 | 1.86  | 0.06 |
| L100I        | G190E        | 0  | 629  | 54   | 0.00 | 0.00 | 0.00 | NA    | 0.07 |
| Y188L        | <i>K238N</i> | 1  | 719  | 49   | 0.00 | 0.00 | 0.00 | -1.83 | 0.07 |
| A98G         | F227L        | 26 | 936  | 199  | 0.02 | 0.01 | 0.00 | 1.83  | 0.07 |
| <i>T139R</i> | P225H        | 0  | 99   | 338  | 0.00 | 0.01 | 0.00 | NA    | 0.07 |
| Y181C        | <i>D237E</i> | 25 | 2652 | 134  | 0.01 | 0.01 | 0.00 | -1.81 | 0.07 |
| Y181I        | H221Y        | 14 | 116  | 705  | 0.02 | 0.01 | 0.00 | 1.80  | 0.07 |
| K101E        | <i>Q242L</i> | 0  | 829  | 39   | 0.00 | 0.00 | 0.00 | NA    | 0.07 |
| <i>S105T</i> | G190A        | 9  | 15   | 1893 | 0.00 | 0.00 | 0.00 | 1.78  | 0.07 |
| K101N        | V106I        | 1  | 43   | 815  | 0.00 | 0.00 | 0.00 | -1.78 | 0.08 |
| V179D        | K238T        | 9  | 596  | 290  | 0.01 | 0.02 | 0.00 | -1.77 | 0.08 |
| H221Y        | <i>K238N</i> | 1  | 717  | 47   | 0.00 | 0.00 | 0.00 | -1.76 | 0.08 |
| Y181C        | <i>Q242L</i> | 15 | 2669 | 24   | 0.01 | 0.00 | 0.00 | 1.76  | 0.08 |
| V179D        | G190E        | 0  | 605  | 53   | 0.00 | 0.00 | 0.00 | NA    | 0.08 |
| K101P        | Y181I        | 0  | 240  | 135  | 0.00 | 0.01 | 0.00 | NA    | 0.08 |
| <i>K102N</i> | H221Y        | 1  | 47   | 716  | 0.00 | 0.00 | 0.00 | -1.75 | 0.08 |
| L100I        | <i>F227Y</i> | 5  | 624  | 17   | 0.01 | 0.00 | 0.00 | 1.75  | 0.08 |
| L100I        | <i>K223T</i> | 8  | 617  | 56   | 0.01 | 0.00 | 0.00 | 1.75  | 0.08 |
| <i>F227Y</i> | <i>L234I</i> | 3  | 19   | 24   | 0.07 | 0.00 | 0.04 | 1.73  | 0.08 |
| L100I        | <i>K102N</i> | 0  | 628  | 49   | 0.00 | 0.00 | 0.00 | NA    | 0.09 |
| A98G         | <i>T139R</i> | 4  | 969  | 94   | 0.00 | 0.01 | 0.00 | -1.70 | 0.09 |
| V108I        | K238T        | 33 | 998  | 251  | 0.03 | 0.02 | 0.00 | 1.69  | 0.09 |
| V90I         | <i>I178F</i> | 0  | 1102 | 26   | 0.00 | 0.00 | 0.00 | NA    | 0.09 |
| V90I         | Y188C        | 0  | 1101 | 26   | 0.00 | 0.00 | 0.00 | NA    | 0.09 |
| V90I         | P236L        | 0  | 1102 | 26   | 0.00 | 0.00 | 0.00 | NA    | 0.09 |
| H221Y        | M230L        | 12 | 706  | 98   | 0.01 | 0.01 | 0.00 | 1.67  | 0.09 |
| <i>K223T</i> | <i>L234I</i> | 3  | 62   | 24   | 0.03 | 0.00 | 0.02 | 1.67  | 0.1  |
| K101E        | G190Q        | 0  | 829  | 35   | 0.00 | 0.00 | 0.00 | NA    | 0.1  |
| <i>S105T</i> | H221Y        | 5  | 18   | 714  | 0.01 | 0.00 | 0.00 | 1.66  | 0.1  |
| V90I         | <i>D237E</i> | 9  | 1092 | 150  | 0.01 | 0.01 | 0.00 | -1.66 | 0.1  |
| L100I        | Y181I        | 12 | 617  | 119  | 0.02 | 0.01 | 0.00 | 1.65  | 0.1  |
| A98G         | K103S        | 10 | 961  | 190  | 0.01 | 0.01 | 0.00 | -1.64 | 0.1  |



|              |              |    |      |      |      |      |      |       |      |
|--------------|--------------|----|------|------|------|------|------|-------|------|
| V106I        | G190Q        | 0  | 816  | 35   | 0.00 | 0.00 | 0.00 | NA    | 0.1  |
| V179D        | Y318F        | 0  | 604  | 48   | 0.00 | 0.00 | 0.00 | NA    | 0.1  |
| <i>S105T</i> | Y188L        | 5  | 19   | 716  | 0.01 | 0.00 | 0.00 | 1.64  | 0.1  |
| V106A        | V179D        | 5  | 180  | 597  | 0.01 | 0.01 | 0.00 | -1.64 | 0.1  |
| E138Q        | Y188L        | 2  | 75   | 719  | 0.00 | 0.01 | 0.00 | -1.63 | 0.1  |
| Y181C        | P236L        | 3  | 2684 | 24   | 0.00 | 0.00 | 0.00 | -1.63 | 0.1  |
| V108I        | Y188C        | 0  | 1047 | 26   | 0.00 | 0.00 | 0.00 | NA    | 0.1  |
| L100I        | K101N        | 0  | 629  | 45   | 0.00 | 0.00 | 0.00 | NA    | 0.1  |
| H221Y        | <i>L234I</i> | 5  | 714  | 19   | 0.01 | 0.00 | 0.00 | 1.62  | 0.11 |
| <i>K101H</i> | V106A        | 1  | 181  | 183  | 0.00 | 0.01 | 0.00 | -1.62 | 0.11 |
| K101P        | E138Q        | 5  | 234  | 72   | 0.02 | 0.00 | 0.01 | 1.61  | 0.11 |
| H221Y        | <i>Q242L</i> | 0  | 719  | 38   | 0.00 | 0.00 | 0.00 | NA    | 0.11 |
| Y181I        | <i>F227Y</i> | 3  | 132  | 19   | 0.02 | 0.00 | 0.01 | 1.61  | 0.11 |
| <i>I94L</i>  | Y181C        | 9  | 56   | 2676 | 0.00 | 0.01 | 0.00 | -1.61 | 0.11 |
| V179T        | G190A        | 7  | 67   | 1896 | 0.00 | 0.01 | 0.00 | -1.60 | 0.11 |
| E138Q        | G190A        | 7  | 68   | 1886 | 0.00 | 0.01 | 0.00 | -1.60 | 0.11 |
| <i>I178F</i> | H221Y        | 5  | 21   | 713  | 0.01 | 0.00 | 0.00 | 1.59  | 0.11 |
| A98G         | Y188L        | 44 | 926  | 673  | 0.03 | 0.03 | 0.00 | -1.59 | 0.11 |
| V179T        | Y188L        | 2  | 74   | 719  | 0.00 | 0.01 | 0.00 | -1.59 | 0.11 |
| V90I         | <i>K238N</i> | 2  | 1098 | 46   | 0.00 | 0.00 | 0.00 | -1.59 | 0.11 |
| V179T        | H221Y        | 2  | 73   | 715  | 0.00 | 0.01 | 0.00 | -1.58 | 0.11 |
| V90I         | <i>S105T</i> | 0  | 1101 | 24   | 0.00 | 0.00 | 0.00 | NA    | 0.11 |
| V90I         | V179F        | 0  | 1099 | 24   | 0.00 | 0.00 | 0.00 | NA    | 0.11 |
| V108I        | <i>L234I</i> | 6  | 1038 | 20   | 0.01 | 0.00 | 0.00 | 1.58  | 0.12 |
| K101N        | V179D        | 0  | 45   | 604  | 0.00 | 0.00 | 0.00 | NA    | 0.12 |
| Y188L        | <i>K223T</i> | 8  | 710  | 57   | 0.01 | 0.00 | 0.00 | 1.57  | 0.12 |
| K103N        | <i>K238N</i> | 30 | 5523 | 19   | 0.01 | 0.00 | 0.00 | 1.56  | 0.12 |
| K101P        | <i>F227L</i> | 2  | 238  | 226  | 0.00 | 0.01 | 0.00 | -1.56 | 0.12 |
| A98G         | <i>L234I</i> | 0  | 974  | 27   | 0.00 | 0.00 | 0.00 | NA    | 0.12 |
| <i>K101H</i> | <i>K238T</i> | 2  | 179  | 298  | 0.00 | 0.01 | 0.00 | -1.56 | 0.12 |
| G190A        | <i>V241M</i> | 0  | 1904 | 13   | 0.00 | 0.00 | 0.00 | NA    | 0.12 |
| K103S        | Y181I        | 0  | 201  | 133  | 0.00 | 0.01 | 0.00 | NA    | 0.12 |
| <i>S105T</i> | V108I        | 0  | 24   | 1046 | 0.00 | 0.00 | 0.00 | NA    | 0.12 |
| E138A        | <i>L234I</i> | 0  | 962  | 27   | 0.00 | 0.00 | 0.00 | NA    | 0.13 |
| K101E        | Y188H        | 1  | 822  | 38   | 0.00 | 0.00 | 0.00 | -1.53 | 0.13 |
| V90I         | Y318F        | 2  | 1100 | 46   | 0.00 | 0.00 | 0.00 | -1.52 | 0.13 |
| A98G         | Y188C        | 0  | 972  | 26   | 0.00 | 0.00 | 0.00 | NA    | 0.13 |
| E138A        | V179T        | 3  | 958  | 73   | 0.00 | 0.01 | 0.00 | -1.52 | 0.13 |
| V179T        | <i>P225H</i> | 0  | 76   | 338  | 0.00 | 0.00 | 0.00 | NA    | 0.13 |
| V106M        | E138A        | 8  | 156  | 950  | 0.01 | 0.01 | 0.00 | -1.51 | 0.13 |
| V108I        | <i>Q242L</i> | 7  | 1039 | 30   | 0.01 | 0.00 | 0.00 | 1.50  | 0.13 |
| V108I        | M230L        | 15 | 1031 | 95   | 0.01 | 0.01 | 0.00 | 1.50  | 0.13 |

|       |       |    |      |      |      |      |      |       |      |
|-------|-------|----|------|------|------|------|------|-------|------|
| K101E | V179F | 5  | 819  | 21   | 0.01 | 0.00 | 0.00 | 1.50  | 0.13 |
| Y188L | G190Q | 0  | 723  | 35   | 0.00 | 0.00 | 0.00 | NA    | 0.13 |
| E138A | Y188C | 0  | 962  | 26   | 0.00 | 0.00 | 0.00 | NA    | 0.13 |
| E138A | V179F | 0  | 960  | 26   | 0.00 | 0.00 | 0.00 | NA    | 0.14 |
| V90I  | F227Y | 0  | 1102 | 22   | 0.00 | 0.00 | 0.00 | NA    | 0.14 |
| K103S | G190S | 3  | 195  | 358  | 0.01 | 0.01 | 0.00 | -1.48 | 0.14 |
| K101N | H221Y | 6  | 37   | 708  | 0.01 | 0.00 | 0.00 | 1.48  | 0.14 |
| K101P | K238T | 3  | 236  | 297  | 0.01 | 0.01 | 0.00 | -1.48 | 0.14 |
| L100I | Q242L | 0  | 629  | 39   | 0.00 | 0.00 | 0.00 | NA    | 0.14 |
| K103T | G190A | 0  | 12   | 1902 | 0.00 | 0.00 | 0.00 | NA    | 0.14 |
| V106A | Y181I | 0  | 185  | 135  | 0.00 | 0.01 | 0.00 | NA    | 0.14 |
| G190A | Q242L | 10 | 1888 | 26   | 0.01 | 0.00 | 0.00 | 1.47  | 0.14 |
| K223T | F227L | 4  | 60   | 224  | 0.01 | 0.00 | 0.01 | 1.46  | 0.15 |
| Y181C | G190C | 2  | 2683 | 17   | 0.00 | 0.00 | 0.00 | -1.45 | 0.15 |
| K102N | K103N | 29 | 19   | 5544 | 0.01 | 0.00 | 0.00 | 1.45  | 0.15 |
| V179D | Y181I | 11 | 593  | 123  | 0.02 | 0.01 | 0.00 | 1.44  | 0.15 |
| L100I | K238N | 1  | 627  | 49   | 0.00 | 0.00 | 0.00 | -1.44 | 0.15 |
| V179D | Q242L | 0  | 605  | 39   | 0.00 | 0.00 | 0.00 | NA    | 0.15 |
| K101P | T139R | 0  | 240  | 99   | 0.00 | 0.01 | 0.00 | NA    | 0.16 |
| Y181V | P225H | 0  | 69   | 338  | 0.00 | 0.00 | 0.00 | NA    | 0.16 |
| K103S | Q242L | 3  | 198  | 35   | 0.01 | 0.00 | 0.01 | 1.41  | 0.16 |
| Y181I | F227L | 1  | 134  | 227  | 0.00 | 0.01 | 0.00 | -1.40 | 0.16 |
| I94L  | K101P | 4  | 61   | 235  | 0.01 | 0.00 | 0.01 | 1.40  | 0.16 |
| K103S | M230L | 0  | 201  | 116  | 0.00 | 0.01 | 0.00 | NA    | 0.16 |
| G190S | K223T | 0  | 362  | 64   | 0.00 | 0.00 | 0.00 | NA    | 0.16 |
| K101E | L234I | 0  | 830  | 27   | 0.00 | 0.00 | 0.00 | NA    | 0.16 |
| K101N | G190S | 4  | 41   | 352  | 0.01 | 0.00 | 0.01 | 1.39  | 0.16 |
| V179T | K238T | 0  | 76   | 299  | 0.00 | 0.00 | 0.00 | NA    | 0.17 |
| I178F | K238T | 3  | 24   | 297  | 0.01 | 0.00 | 0.01 | 1.38  | 0.17 |
| K238N | V241M | 2  | 48   | 11   | 0.03 | 0.00 | 0.02 | 1.38  | 0.17 |
| L100I | G190Q | 0  | 629  | 35   | 0.00 | 0.00 | 0.00 | NA    | 0.17 |
| F227Y | Y318F | 2  | 20   | 46   | 0.03 | 0.00 | 0.02 | 1.36  | 0.17 |
| K223T | P225H | 0  | 65   | 337  | 0.00 | 0.00 | 0.00 | NA    | 0.18 |
| A98G  | Y232H | 0  | 974  | 22   | 0.00 | 0.00 | 0.00 | NA    | 0.18 |
| I94L  | P225H | 0  | 65   | 336  | 0.00 | 0.00 | 0.00 | NA    | 0.18 |
| F227L | M230L | 5  | 223  | 109  | 0.01 | 0.01 | 0.01 | 1.35  | 0.18 |
| K101N | V108I | 7  | 35   | 1032 | 0.01 | 0.00 | 0.00 | 1.35  | 0.18 |
| V106M | Y181I | 0  | 164  | 134  | 0.00 | 0.01 | 0.00 | NA    | 0.18 |
| V179D | K238N | 1  | 603  | 49   | 0.00 | 0.00 | 0.00 | -1.34 | 0.18 |
| K103T | M230L | 2  | 10   | 114  | 0.02 | 0.00 | 0.01 | 1.34  | 0.18 |
| L234I | Y318F | 2  | 25   | 47   | 0.03 | 0.00 | 0.02 | 1.34  | 0.18 |
| E138A | Y232H | 0  | 961  | 22   | 0.00 | 0.00 | 0.00 | NA    | 0.18 |

|       |       |    |      |      |      |      |      |       |      |
|-------|-------|----|------|------|------|------|------|-------|------|
| V106I | Y232H | 4  | 809  | 18   | 0.00 | 0.00 | 0.00 | 1.32  | 0.19 |
| T139R | K238T | 1  | 99   | 299  | 0.00 | 0.01 | 0.00 | -1.32 | 0.19 |
| K101P | G190S | 4  | 235  | 356  | 0.01 | 0.01 | 0.00 | -1.32 | 0.19 |
| H221C | M230L | 2  | 14   | 114  | 0.02 | 0.00 | 0.01 | 1.32  | 0.19 |
| K102N | Y188L | 6  | 43   | 714  | 0.01 | 0.00 | 0.00 | 1.32  | 0.19 |
| V108I | G190C | 0  | 1047 | 19   | 0.00 | 0.00 | 0.00 | NA    | 0.19 |
| V179F | H221Y | 4  | 21   | 713  | 0.01 | 0.00 | 0.00 | 1.31  | 0.19 |
| K102N | V108I | 2  | 44   | 1045 | 0.00 | 0.00 | 0.00 | -1.30 | 0.19 |
| K103T | V106A | 2  | 10   | 183  | 0.01 | 0.00 | 0.01 | 1.30  | 0.19 |
| V106I | I178F | 0  | 816  | 25   | 0.00 | 0.00 | 0.00 | NA    | 0.19 |
| Y181V | K238T | 0  | 68   | 300  | 0.00 | 0.00 | 0.00 | NA    | 0.2  |
| K101H | V106M | 1  | 181  | 161  | 0.00 | 0.01 | 0.00 | -1.28 | 0.2  |
| K223T | Q242L | 2  | 63   | 37   | 0.02 | 0.00 | 0.01 | 1.28  | 0.2  |
| K101E | Y181I | 13 | 815  | 119  | 0.01 | 0.01 | 0.00 | 1.27  | 0.2  |
| V90I  | L234I | 1  | 1100 | 25   | 0.00 | 0.00 | 0.00 | -1.26 | 0.21 |
| I94L  | K238T | 4  | 60   | 295  | 0.01 | 0.00 | 0.01 | 1.26  | 0.21 |
| L100I | P225H | 12 | 611  | 321  | 0.01 | 0.02 | 0.00 | -1.26 | 0.21 |
| S105T | V106I | 0  | 24   | 816  | 0.00 | 0.00 | 0.00 | NA    | 0.21 |
| V90I  | E138Q | 4  | 1095 | 71   | 0.00 | 0.01 | 0.00 | -1.25 | 0.21 |
| K103S | T139R | 0  | 201  | 99   | 0.00 | 0.01 | 0.00 | NA    | 0.21 |
| Y188L | L234I | 0  | 723  | 27   | 0.00 | 0.00 | 0.00 | NA    | 0.21 |
| Y188L | P236L | 0  | 722  | 27   | 0.00 | 0.00 | 0.00 | NA    | 0.21 |
| H221C | F227L | 2  | 14   | 226  | 0.01 | 0.00 | 0.01 | 1.22  | 0.22 |
| I94L  | V108I | 9  | 56   | 1032 | 0.01 | 0.00 | 0.00 | 1.22  | 0.22 |
| A98G  | Y181I | 7  | 966  | 127  | 0.01 | 0.01 | 0.00 | -1.21 | 0.23 |
| V108I | Y181V | 9  | 1038 | 56   | 0.01 | 0.00 | 0.00 | 1.21  | 0.23 |
| V179F | Y188L | 0  | 26   | 721  | 0.00 | 0.00 | 0.00 | NA    | 0.23 |
| Y181V | G190A | 7  | 61   | 1893 | 0.00 | 0.01 | 0.00 | -1.21 | 0.23 |
| K101H | D237E | 5  | 174  | 156  | 0.01 | 0.01 | 0.01 | 1.21  | 0.23 |
| K103N | K223T | 34 | 5540 | 28   | 0.01 | 0.00 | 0.00 | 1.20  | 0.23 |
| K101E | Y232H | 0  | 828  | 22   | 0.00 | 0.00 | 0.00 | NA    | 0.23 |
| E138A | F227Y | 0  | 962  | 19   | 0.00 | 0.00 | 0.00 | NA    | 0.23 |
| E138Q | V179D | 2  | 75   | 603  | 0.00 | 0.01 | 0.00 | -1.19 | 0.23 |
| V90I  | H221C | 0  | 1101 | 16   | 0.00 | 0.00 | 0.00 | NA    | 0.23 |
| G190E | P225H | 0  | 54   | 338  | 0.00 | 0.00 | 0.00 | NA    | 0.24 |
| V106A | T139R | 0  | 184  | 100  | 0.00 | 0.00 | 0.00 | NA    | 0.24 |
| E138A | Y318F | 2  | 959  | 47   | 0.00 | 0.00 | 0.00 | -1.18 | 0.24 |
| K101P | V179T | 0  | 240  | 76   | 0.00 | 0.00 | 0.00 | NA    | 0.24 |
| V106A | Y232H | 2  | 183  | 21   | 0.01 | 0.00 | 0.01 | 1.17  | 0.24 |
| I94L  | K103S | 3  | 60   | 196  | 0.01 | 0.00 | 0.01 | 1.17  | 0.24 |
| G190A | H221C | 5  | 1897 | 11   | 0.00 | 0.00 | 0.00 | 1.17  | 0.24 |
| V90I  | K102N | 7  | 1093 | 39   | 0.01 | 0.00 | 0.00 | 1.17  | 0.24 |

|       |       |    |      |     |      |      |      |       |      |
|-------|-------|----|------|-----|------|------|------|-------|------|
| K101H | F227L | 6  | 175  | 219 | 0.02 | 0.01 | 0.01 | 1.16  | 0.25 |
| V108I | V241M | 3  | 1044 | 9   | 0.00 | 0.00 | 0.00 | 1.15  | 0.25 |
| G190S | Y318F | 0  | 362  | 49  | 0.00 | 0.00 | 0.00 | NA    | 0.25 |
| K101E | M230L | 5  | 824  | 111 | 0.01 | 0.01 | 0.00 | -1.15 | 0.25 |
| K101P | M230L | 1  | 239  | 115 | 0.00 | 0.01 | 0.00 | -1.15 | 0.25 |
| V108I | P236L | 1  | 1045 | 25  | 0.00 | 0.00 | 0.00 | -1.14 | 0.25 |
| K103S | I178F | 2  | 199  | 24  | 0.01 | 0.00 | 0.01 | 1.14  | 0.25 |
| L100I | L234I | 0  | 629  | 27  | 0.00 | 0.00 | 0.00 | NA    | 0.26 |
| L100I | I178F | 0  | 629  | 27  | 0.00 | 0.00 | 0.00 | NA    | 0.26 |
| L100I | P236L | 0  | 629  | 27  | 0.00 | 0.00 | 0.00 | NA    | 0.26 |
| K101H | V106I | 8  | 168  | 806 | 0.01 | 0.01 | 0.00 | -1.13 | 0.26 |
| V106A | P236L | 2  | 183  | 25  | 0.01 | 0.00 | 0.01 | 1.12  | 0.26 |
| M230L | K238N | 2  | 114  | 48  | 0.01 | 0.00 | 0.01 | 1.11  | 0.27 |
| I94L  | K101E | 7  | 56   | 821 | 0.01 | 0.00 | 0.00 | 1.11  | 0.27 |
| K103N | Y318F | 26 | 5566 | 20  | 0.00 | 0.00 | 0.00 | 1.11  | 0.27 |
| G190A | K238N | 5  | 1896 | 45  | 0.00 | 0.00 | 0.00 | -1.11 | 0.27 |
| L100I | V179F | 0  | 629  | 26  | 0.00 | 0.00 | 0.00 | NA    | 0.27 |
| L100I | Y188C | 0  | 629  | 26  | 0.00 | 0.00 | 0.00 | NA    | 0.27 |
| K101P | Y181V | 0  | 240  | 69  | 0.00 | 0.00 | 0.00 | NA    | 0.27 |
| I178F | V179D | 0  | 27   | 605 | 0.00 | 0.00 | 0.00 | NA    | 0.27 |
| V179D | P236L | 0  | 605  | 27  | 0.00 | 0.00 | 0.00 | NA    | 0.28 |
| V179D | L234I | 0  | 603  | 27  | 0.00 | 0.00 | 0.00 | NA    | 0.28 |
| K102N | P225H | 0  | 48   | 338 | 0.00 | 0.00 | 0.00 | NA    | 0.28 |
| H221Y | F227Y | 0  | 716  | 22  | 0.00 | 0.00 | 0.00 | NA    | 0.28 |
| A98G  | K103H | 3  | 967  | 12  | 0.00 | 0.00 | 0.00 | 1.08  | 0.28 |
| G190E | K238T | 0  | 54   | 300 | 0.00 | 0.00 | 0.00 | NA    | 0.28 |
| K101P | Y188L | 10 | 230  | 711 | 0.01 | 0.01 | 0.00 | -1.08 | 0.28 |
| V106M | T139R | 0  | 163  | 100 | 0.00 | 0.00 | 0.00 | NA    | 0.28 |
| I178F | F227L | 2  | 25   | 223 | 0.01 | 0.00 | 0.01 | 1.07  | 0.28 |
| A98G  | M230L | 6  | 967  | 109 | 0.01 | 0.01 | 0.00 | -1.07 | 0.28 |
| V106M | D237E | 1  | 163  | 161 | 0.00 | 0.01 | 0.00 | -1.07 | 0.29 |
| V106I | G190C | 0  | 816  | 19  | 0.00 | 0.00 | 0.00 | NA    | 0.29 |
| A98G  | K238T | 18 | 946  | 276 | 0.01 | 0.02 | 0.00 | -1.06 | 0.29 |
| K101E | V106I | 45 | 771  | 759 | 0.03 | 0.03 | 0.00 | -1.06 | 0.29 |
| V90I  | T139R | 12 | 1085 | 85  | 0.01 | 0.01 | 0.00 | 1.06  | 0.29 |
| V106M | Y188H | 2  | 162  | 37  | 0.01 | 0.00 | 0.01 | 1.06  | 0.29 |
| E138A | H221C | 0  | 961  | 16  | 0.00 | 0.00 | 0.00 | NA    | 0.29 |
| K101E | E138A | 69 | 758  | 873 | 0.04 | 0.04 | 0.00 | 1.04  | 0.3  |
| Y181I | M230L | 0  | 133  | 116 | 0.00 | 0.00 | 0.00 | NA    | 0.3  |
| Y181V | F227L | 3  | 66   | 224 | 0.01 | 0.00 | 0.01 | 1.03  | 0.3  |
| K101H | H221Y | 14 | 166  | 703 | 0.02 | 0.01 | 0.00 | 1.02  | 0.31 |
| Y181V | H221Y | 6  | 57   | 712 | 0.01 | 0.00 | 0.00 | 1.02  | 0.31 |

|       |       |    |      |      |      |      |      |       |      |
|-------|-------|----|------|------|------|------|------|-------|------|
| K238T | Y318F | 0  | 300  | 49   | 0.00 | 0.00 | 0.00 | NA    | 0.31 |
| A98G  | V179F | 4  | 964  | 22   | 0.00 | 0.00 | 0.00 | 1.00  | 0.32 |
| L100I | Y232H | 0  | 629  | 23   | 0.00 | 0.00 | 0.00 | NA    | 0.32 |
| K103H | E138A | 0  | 15   | 961  | 0.00 | 0.00 | 0.00 | NA    | 0.32 |
| L100I | S105T | 0  | 628  | 23   | 0.00 | 0.00 | 0.00 | NA    | 0.32 |
| E138A | I178F | 1  | 961  | 26   | 0.00 | 0.00 | 0.00 | -1.00 | 0.32 |
| K101E | V106M | 14 | 812  | 145  | 0.01 | 0.01 | 0.00 | 0.99  | 0.32 |
| D237E | K238N | 2  | 160  | 46   | 0.01 | 0.00 | 0.01 | 0.99  | 0.32 |
| Y181I | G190A | 16 | 116  | 1886 | 0.01 | 0.01 | 0.00 | -0.99 | 0.32 |
| G190A | Y318F | 5  | 1898 | 43   | 0.00 | 0.00 | 0.00 | -0.99 | 0.32 |
| G190C | H221Y | 0  | 19   | 719  | 0.00 | 0.00 | 0.00 | NA    | 0.33 |
| I94L  | H221Y | 6  | 58   | 711  | 0.01 | 0.00 | 0.00 | 0.98  | 0.33 |
| Y188H | G190S | 0  | 39   | 361  | 0.00 | 0.00 | 0.00 | NA    | 0.33 |
| V106A | V179T | 0  | 185  | 76   | 0.00 | 0.00 | 0.00 | NA    | 0.33 |
| K101H | E138Q | 0  | 182  | 77   | 0.00 | 0.00 | 0.00 | NA    | 0.33 |
| V106A | E138Q | 0  | 184  | 76   | 0.00 | 0.00 | 0.00 | NA    | 0.34 |
| A98G  | I178F | 4  | 969  | 23   | 0.00 | 0.00 | 0.00 | 0.96  | 0.34 |
| S105T | H221C | 1  | 23   | 15   | 0.03 | 0.00 | 0.03 | 0.96  | 0.34 |
| Y188L | G190C | 0  | 723  | 19   | 0.00 | 0.00 | 0.00 | NA    | 0.34 |
| V90I  | K103T | 0  | 1102 | 12   | 0.00 | 0.00 | 0.00 | NA    | 0.34 |
| V90I  | V241M | 0  | 1101 | 12   | 0.00 | 0.00 | 0.00 | NA    | 0.34 |
| K103S | Y181V | 0  | 201  | 69   | 0.00 | 0.00 | 0.00 | NA    | 0.34 |
| K101H | V179T | 0  | 182  | 76   | 0.00 | 0.00 | 0.00 | NA    | 0.34 |
| K103T | K238N | 1  | 11   | 49   | 0.02 | 0.00 | 0.02 | 0.95  | 0.34 |
| V108I | Y232H | 1  | 1046 | 22   | 0.00 | 0.00 | 0.00 | -0.94 | 0.34 |
| K101N | K238T | 0  | 45   | 299  | 0.00 | 0.00 | 0.00 | NA    | 0.35 |
| K103T | K223T | 1  | 11   | 64   | 0.01 | 0.00 | 0.01 | 0.94  | 0.35 |
| S105T | Y188C | 1  | 23   | 25   | 0.02 | 0.00 | 0.02 | 0.94  | 0.35 |
| V179D | F227Y | 0  | 605  | 22   | 0.00 | 0.00 | 0.00 | NA    | 0.35 |
| K101H | Y181I | 1  | 181  | 134  | 0.00 | 0.01 | 0.00 | -0.94 | 0.35 |
| V179D | Y232H | 0  | 605  | 22   | 0.00 | 0.00 | 0.00 | NA    | 0.35 |
| V106I | H221C | 0  | 815  | 16   | 0.00 | 0.00 | 0.00 | NA    | 0.35 |
| K103T | V108I | 0  | 12   | 1047 | 0.00 | 0.00 | 0.00 | NA    | 0.35 |
| Y188H | P225H | 0  | 39   | 338  | 0.00 | 0.00 | 0.00 | NA    | 0.35 |
| P225H | Q242L | 0  | 338  | 39   | 0.00 | 0.00 | 0.00 | NA    | 0.35 |
| F227Y | Q242L | 1  | 21   | 38   | 0.02 | 0.00 | 0.02 | 0.93  | 0.35 |
| V108I | D237E | 17 | 1024 | 143  | 0.01 | 0.01 | 0.00 | 0.92  | 0.36 |
| E138A | P236L | 1  | 961  | 25   | 0.00 | 0.00 | 0.00 | -0.92 | 0.36 |
| K101N | E138A | 2  | 43   | 957  | 0.00 | 0.00 | 0.00 | -0.92 | 0.36 |
| A98G  | V241M | 0  | 973  | 13   | 0.00 | 0.00 | 0.00 | NA    | 0.36 |
| Y188L | Q242L | 4  | 716  | 35   | 0.01 | 0.00 | 0.00 | 0.91  | 0.36 |
| T139R | V179D | 3  | 95   | 601  | 0.00 | 0.01 | 0.00 | -0.91 | 0.36 |

|              |              |     |      |     |      |      |      |       |      |
|--------------|--------------|-----|------|-----|------|------|------|-------|------|
| <i>I178F</i> | <i>Q242L</i> | 1   | 26   | 38  | 0.02 | 0.00 | 0.02 | 0.91  | 0.36 |
| F227L        | <i>Q242L</i> | 2   | 226  | 37  | 0.01 | 0.00 | 0.01 | 0.91  | 0.36 |
| K101P        | G190E        | 0   | 240  | 54  | 0.00 | 0.00 | 0.00 | NA    | 0.36 |
| G190A        | <i>F227Y</i> | 2   | 1899 | 20  | 0.00 | 0.00 | 0.00 | -0.91 | 0.36 |
| K101E        | <i>H221C</i> | 0   | 828  | 15  | 0.00 | 0.00 | 0.00 | NA    | 0.37 |
| K101N        | V179F        | 1   | 44   | 25  | 0.01 | 0.00 | 0.01 | 0.90  | 0.37 |
| K103S        | Y318F        | 2   | 199  | 46  | 0.01 | 0.00 | 0.01 | 0.90  | 0.37 |
| K103N        | H221Y        | 285 | 5111 | 396 | 0.05 | 0.05 | 0.00 | -0.90 | 0.37 |
| P225H        | M230L        | 5   | 333  | 110 | 0.01 | 0.01 | 0.00 | 0.90  | 0.37 |
| V179F        | G190S        | 2   | 24   | 357 | 0.01 | 0.00 | 0.00 | 0.90  | 0.37 |
| E138A        | <i>V241M</i> | 0   | 961  | 13  | 0.00 | 0.00 | 0.00 | NA    | 0.37 |
| V106A        | Y181V        | 0   | 185  | 69  | 0.00 | 0.00 | 0.00 | NA    | 0.37 |
| V106M        | E138Q        | 0   | 164  | 77  | 0.00 | 0.00 | 0.00 | NA    | 0.37 |
| K103H        | V106I        | 0   | 15   | 816 | 0.00 | 0.00 | 0.00 | NA    | 0.37 |
| <i>I178F</i> | G190E        | 1   | 26   | 53  | 0.01 | 0.00 | 0.01 | 0.89  | 0.37 |
| L100I        | Y188H        | 1   | 628  | 38  | 0.00 | 0.00 | 0.00 | -0.89 | 0.38 |
| V106I        | M230L        | 10  | 804  | 105 | 0.01 | 0.01 | 0.00 | 0.89  | 0.38 |
| P236L        | Y318F        | 1   | 26   | 48  | 0.01 | 0.00 | 0.01 | 0.88  | 0.38 |
| V106M        | V179T        | 0   | 164  | 76  | 0.00 | 0.00 | 0.00 | NA    | 0.38 |
| V179T        | G190C        | 1   | 75   | 18  | 0.01 | 0.00 | 0.01 | 0.88  | 0.38 |
| <i>I94L</i>  | <i>S105T</i> | 1   | 64   | 23  | 0.01 | 0.00 | 0.01 | 0.88  | 0.38 |
| G190E        | F227L        | 0   | 54   | 228 | 0.00 | 0.00 | 0.00 | NA    | 0.38 |
| <i>K101H</i> | Y181V        | 0   | 182  | 68  | 0.00 | 0.00 | 0.00 | NA    | 0.38 |
| <i>I178F</i> | Y188L        | 3   | 24   | 717 | 0.00 | 0.00 | 0.00 | 0.87  | 0.38 |
| <i>I94L</i>  | L100I        | 2   | 63   | 626 | 0.00 | 0.00 | 0.00 | -0.87 | 0.38 |
| <i>I94L</i>  | <i>I178F</i> | 1   | 64   | 24  | 0.01 | 0.00 | 0.01 | 0.87  | 0.38 |
| L100I        | G190C        | 0   | 629  | 19  | 0.00 | 0.00 | 0.00 | NA    | 0.39 |
| V90I         | <i>Y232H</i> | 1   | 1101 | 20  | 0.00 | 0.00 | 0.00 | -0.86 | 0.39 |
| A98G         | K103T        | 0   | 972  | 12  | 0.00 | 0.00 | 0.00 | NA    | 0.39 |
| K101P        | <i>K238N</i> | 0   | 240  | 50  | 0.00 | 0.00 | 0.00 | NA    | 0.39 |
| K101P        | V106I        | 12  | 222  | 804 | 0.01 | 0.01 | 0.00 | -0.86 | 0.39 |
| G190Q        | P225H        | 0   | 35   | 338 | 0.00 | 0.00 | 0.00 | NA    | 0.39 |
| <i>I94L</i>  | V106M        | 2   | 63   | 162 | 0.01 | 0.00 | 0.01 | 0.85  | 0.39 |
| <i>S105T</i> | V179T        | 1   | 23   | 75  | 0.01 | 0.00 | 0.01 | 0.85  | 0.39 |
| <i>D237E</i> | <i>V241M</i> | 1   | 161  | 11  | 0.01 | 0.00 | 0.01 | 0.85  | 0.4  |
| <i>I178F</i> | Y181V        | 1   | 26   | 68  | 0.01 | 0.00 | 0.01 | 0.85  | 0.4  |
| Y181I        | <i>H221C</i> | 1   | 134  | 15  | 0.01 | 0.00 | 0.01 | 0.85  | 0.4  |
| Y188H        | K238T        | 0   | 39   | 300 | 0.00 | 0.00 | 0.00 | NA    | 0.4  |
| K103T        | E138A        | 0   | 12   | 962 | 0.00 | 0.00 | 0.00 | NA    | 0.4  |
| <i>I94L</i>  | V106A        | 0   | 64   | 185 | 0.00 | 0.00 | 0.00 | NA    | 0.4  |
| <i>I94L</i>  | <i>K101H</i> | 0   | 65   | 182 | 0.00 | 0.00 | 0.00 | NA    | 0.4  |
| K238T        | <i>Q242L</i> | 0   | 299  | 39  | 0.00 | 0.00 | 0.00 | NA    | 0.4  |

|       |       |    |      |     |      |      |      |       |      |
|-------|-------|----|------|-----|------|------|------|-------|------|
| Y188L | H221C | 0  | 723  | 16  | 0.00 | 0.00 | 0.00 | NA    | 0.4  |
| K101P | K102N | 0  | 239  | 49  | 0.00 | 0.00 | 0.00 | NA    | 0.4  |
| V106M | V241M | 1  | 163  | 12  | 0.01 | 0.00 | 0.01 | 0.84  | 0.4  |
| V179D | Y188H | 1  | 600  | 38  | 0.00 | 0.00 | 0.00 | -0.84 | 0.4  |
| V179D | G190C | 0  | 605  | 19  | 0.00 | 0.00 | 0.00 | NA    | 0.4  |
| T139R | M230L | 0  | 100  | 116 | 0.00 | 0.00 | 0.00 | NA    | 0.41 |
| V106I | Y188C | 3  | 813  | 22  | 0.00 | 0.00 | 0.00 | 0.83  | 0.41 |
| F227L | K238N | 0  | 228  | 50  | 0.00 | 0.00 | 0.00 | NA    | 0.41 |
| F227L | Y318F | 0  | 228  | 49  | 0.00 | 0.00 | 0.00 | NA    | 0.42 |
| K101E | V241M | 0  | 828  | 13  | 0.00 | 0.00 | 0.00 | NA    | 0.42 |
| Y181V | D237E | 0  | 69   | 162 | 0.00 | 0.00 | 0.00 | NA    | 0.42 |
| K101H | K103H | 1  | 180  | 14  | 0.01 | 0.00 | 0.01 | 0.81  | 0.42 |
| K103H | Y188L | 0  | 15   | 723 | 0.00 | 0.00 | 0.00 | NA    | 0.42 |
| V106M | Y181V | 2  | 161  | 67  | 0.01 | 0.00 | 0.01 | 0.80  | 0.42 |
| T139R | V179F | 1  | 98   | 25  | 0.01 | 0.00 | 0.01 | 0.80  | 0.42 |
| E138Q | H221Y | 3  | 74   | 711 | 0.00 | 0.01 | 0.00 | -0.80 | 0.43 |
| V106I | V241M | 0  | 816  | 13  | 0.00 | 0.00 | 0.00 | NA    | 0.43 |
| V108I | Y318F | 6  | 1039 | 43  | 0.01 | 0.00 | 0.00 | 0.79  | 0.43 |
| V106I | K223T | 6  | 810  | 58  | 0.01 | 0.00 | 0.00 | 0.79  | 0.43 |
| K103S | G190E | 0  | 201  | 54  | 0.00 | 0.00 | 0.00 | NA    | 0.43 |
| I94L  | G190S | 1  | 63   | 361 | 0.00 | 0.00 | 0.00 | -0.79 | 0.43 |
| K101P | Y318F | 2  | 237  | 45  | 0.01 | 0.00 | 0.00 | 0.79  | 0.43 |
| K101H | K223T | 2  | 180  | 63  | 0.01 | 0.00 | 0.01 | 0.79  | 0.43 |
| Y181I | Y232H | 1  | 134  | 22  | 0.01 | 0.00 | 0.01 | 0.79  | 0.43 |
| Y181I | G190C | 1  | 134  | 18  | 0.01 | 0.00 | 0.01 | 0.78  | 0.43 |
| S105T | M230L | 1  | 23   | 115 | 0.01 | 0.00 | 0.01 | 0.78  | 0.43 |
| K101P | K103T | 1  | 238  | 11  | 0.00 | 0.00 | 0.00 | 0.78  | 0.43 |
| K103N | F227Y | 12 | 5578 | 9   | 0.00 | 0.00 | 0.00 | 0.78  | 0.43 |
| G190S | H221Y | 17 | 335  | 698 | 0.02 | 0.02 | 0.00 | -0.78 | 0.44 |
| G190Q | K238T | 0  | 35   | 300 | 0.00 | 0.00 | 0.00 | NA    | 0.44 |
| V106A | K223T | 2  | 182  | 62  | 0.01 | 0.00 | 0.01 | 0.78  | 0.44 |
| T139R | F227L | 1  | 99   | 227 | 0.00 | 0.01 | 0.00 | -0.77 | 0.44 |
| V106A | H221C | 1  | 184  | 15  | 0.01 | 0.00 | 0.01 | 0.77  | 0.44 |
| K223T | D237E | 0  | 65   | 162 | 0.00 | 0.00 | 0.00 | NA    | 0.44 |
| K103S | D237E | 4  | 196  | 155 | 0.01 | 0.01 | 0.01 | 0.77  | 0.44 |
| V106I | P236L | 3  | 813  | 24  | 0.00 | 0.00 | 0.00 | 0.77  | 0.44 |
| H221Y | K238T | 14 | 700  | 280 | 0.01 | 0.02 | 0.00 | -0.77 | 0.44 |
| S105T | Y181I | 1  | 23   | 134 | 0.01 | 0.00 | 0.01 | 0.76  | 0.45 |
| K101E | K103T | 0  | 828  | 12  | 0.00 | 0.00 | 0.00 | NA    | 0.45 |
| E138Q | Y181I | 0  | 77   | 134 | 0.00 | 0.00 | 0.00 | NA    | 0.45 |
| I94L  | Y318F | 1  | 64   | 48  | 0.01 | 0.00 | 0.01 | 0.76  | 0.45 |
| V106I | Y181V | 3  | 813  | 65  | 0.00 | 0.00 | 0.00 | -0.76 | 0.45 |

|       |       |    |      |     |      |      |      |       |      |
|-------|-------|----|------|-----|------|------|------|-------|------|
| L100I | H221C | 0  | 628  | 16  | 0.00 | 0.00 | 0.00 | NA    | 0.45 |
| K101N | F227L | 0  | 45   | 226 | 0.00 | 0.00 | 0.00 | NA    | 0.45 |
| V179T | Y181I | 0  | 76   | 135 | 0.00 | 0.00 | 0.00 | NA    | 0.45 |
| K101E | Y188C | 1  | 828  | 25  | 0.00 | 0.00 | 0.00 | -0.74 | 0.46 |
| K223T | Y318F | 1  | 64   | 48  | 0.01 | 0.00 | 0.01 | 0.74  | 0.46 |
| V108I | F227Y | 3  | 1037 | 18  | 0.00 | 0.00 | 0.00 | 0.74  | 0.46 |
| V106A | G190E | 0  | 185  | 54  | 0.00 | 0.00 | 0.00 | NA    | 0.46 |
| K101P | H221Y | 11 | 223  | 706 | 0.01 | 0.01 | 0.00 | -0.74 | 0.46 |
| K103S | K238N | 0  | 201  | 49  | 0.00 | 0.00 | 0.00 | NA    | 0.46 |
| K102N | K103S | 0  | 49   | 201 | 0.00 | 0.00 | 0.00 | NA    | 0.46 |
| E138Q | D237E | 2  | 75   | 159 | 0.01 | 0.00 | 0.01 | 0.73  | 0.46 |
| G190S | L234I | 0  | 362  | 27  | 0.00 | 0.00 | 0.00 | NA    | 0.47 |
| I178F | G190S | 0  | 27   | 362 | 0.00 | 0.00 | 0.00 | NA    | 0.47 |
| G190S | P236L | 0  | 362  | 27  | 0.00 | 0.00 | 0.00 | NA    | 0.47 |
| K101H | G190E | 0  | 182  | 54  | 0.00 | 0.00 | 0.00 | NA    | 0.47 |
| I94L  | G190E | 1  | 64   | 51  | 0.01 | 0.00 | 0.01 | 0.73  | 0.47 |
| P225H | D237E | 3  | 335  | 158 | 0.01 | 0.01 | 0.00 | -0.72 | 0.47 |
| V106I | Y318F | 2  | 811  | 46  | 0.00 | 0.00 | 0.00 | -0.72 | 0.47 |
| L100I | K103H | 0  | 629  | 15  | 0.00 | 0.00 | 0.00 | NA    | 0.47 |
| K101H | F227Y | 1  | 181  | 21  | 0.00 | 0.00 | 0.00 | 0.72  | 0.47 |
| Y188L | V241M | 0  | 723  | 13  | 0.00 | 0.00 | 0.00 | NA    | 0.48 |
| K238T | V241M | 1  | 299  | 12  | 0.00 | 0.00 | 0.00 | 0.71  | 0.48 |
| Y188C | G190S | 0  | 26   | 362 | 0.00 | 0.00 | 0.00 | NA    | 0.48 |
| K103T | K238T | 1  | 11   | 299 | 0.00 | 0.00 | 0.00 | 0.71  | 0.48 |
| K101P | Y188H | 0  | 240  | 39  | 0.00 | 0.00 | 0.00 | NA    | 0.48 |
| A98G  | Q242L | 2  | 970  | 37  | 0.00 | 0.00 | 0.00 | -0.70 | 0.48 |
| I178F | P225H | 0  | 27   | 338 | 0.00 | 0.00 | 0.00 | NA    | 0.49 |
| P225H | P236L | 0  | 338  | 27  | 0.00 | 0.00 | 0.00 | NA    | 0.49 |
| E138Q | Y318F | 1  | 75   | 48  | 0.01 | 0.00 | 0.01 | 0.70  | 0.49 |
| K103H | V179D | 0  | 15   | 605 | 0.00 | 0.00 | 0.00 | NA    | 0.49 |
| A98G  | D237E | 10 | 954  | 150 | 0.01 | 0.01 | 0.00 | -0.69 | 0.49 |
| K101H | K238N | 0  | 182  | 50  | 0.00 | 0.00 | 0.00 | NA    | 0.49 |
| K101N | K103S | 0  | 45   | 201 | 0.00 | 0.00 | 0.00 | NA    | 0.49 |
| V106A | K238N | 0  | 185  | 49  | 0.00 | 0.00 | 0.00 | NA    | 0.49 |
| V106A | Y318F | 0  | 185  | 49  | 0.00 | 0.00 | 0.00 | NA    | 0.49 |
| K103T | P225H | 1  | 11   | 337 | 0.00 | 0.00 | 0.00 | 0.68  | 0.49 |
| Y181I | D237E | 1  | 133  | 161 | 0.00 | 0.01 | 0.00 | -0.68 | 0.49 |
| K103T | H221Y | 0  | 12   | 719 | 0.00 | 0.00 | 0.00 | NA    | 0.49 |
| M230L | K238T | 4  | 112  | 295 | 0.01 | 0.01 | 0.00 | 0.68  | 0.5  |
| Y188H | F227L | 0  | 39   | 228 | 0.00 | 0.00 | 0.00 | NA    | 0.5  |
| V179F | P225H | 0  | 26   | 338 | 0.00 | 0.00 | 0.00 | NA    | 0.5  |
| Y188C | P225H | 0  | 26   | 338 | 0.00 | 0.00 | 0.00 | NA    | 0.5  |



|       |       |    |      |     |      |      |      |       |      |
|-------|-------|----|------|-----|------|------|------|-------|------|
| K101H | K102N | 0  | 181  | 49  | 0.00 | 0.00 | 0.00 | NA    | 0.5  |
| V106I | V179F | 1  | 812  | 25  | 0.00 | 0.00 | 0.00 | -0.67 | 0.5  |
| V106M | G190E | 0  | 164  | 54  | 0.00 | 0.00 | 0.00 | NA    | 0.5  |
| V179T | M230L | 0  | 76   | 116 | 0.00 | 0.00 | 0.00 | NA    | 0.5  |
| G190E | D237E | 0  | 54   | 162 | 0.00 | 0.00 | 0.00 | NA    | 0.51 |
| Y181I | K223T | 0  | 135  | 65  | 0.00 | 0.00 | 0.00 | NA    | 0.51 |
| S105T | G190S | 0  | 24   | 362 | 0.00 | 0.00 | 0.00 | NA    | 0.51 |
| K101E | K223T | 3  | 827  | 61  | 0.00 | 0.00 | 0.00 | -0.66 | 0.51 |
| I94L  | Y181I | 0  | 65   | 134 | 0.00 | 0.00 | 0.00 | NA    | 0.51 |
| V106A | M230L | 1  | 184  | 115 | 0.00 | 0.01 | 0.00 | -0.66 | 0.51 |
| A98G  | S105T | 3  | 971  | 21  | 0.00 | 0.00 | 0.00 | 0.66  | 0.51 |
| V106I | L234I | 1  | 815  | 25  | 0.00 | 0.00 | 0.00 | -0.65 | 0.51 |
| K101N | T139R | 1  | 44   | 98  | 0.01 | 0.00 | 0.01 | 0.65  | 0.52 |
| Y188L | Y318F | 4  | 717  | 45  | 0.01 | 0.00 | 0.00 | 0.65  | 0.52 |
| K101H | M230L | 1  | 181  | 115 | 0.00 | 0.01 | 0.00 | -0.65 | 0.52 |
| K101P | G190Q | 0  | 240  | 35  | 0.00 | 0.00 | 0.00 | NA    | 0.52 |
| V106M | P236L | 1  | 163  | 26  | 0.01 | 0.00 | 0.01 | 0.64  | 0.52 |
| L100I | V241M | 0  | 629  | 13  | 0.00 | 0.00 | 0.00 | NA    | 0.52 |
| G190S | Y232H | 0  | 361  | 23  | 0.00 | 0.00 | 0.00 | NA    | 0.52 |
| Y188H | M230L | 1  | 38   | 115 | 0.01 | 0.00 | 0.01 | 0.64  | 0.52 |
| K101N | V106A | 0  | 45   | 184 | 0.00 | 0.00 | 0.00 | NA    | 0.52 |
| Y181V | G190S | 3  | 65   | 359 | 0.01 | 0.00 | 0.00 | 0.64  | 0.53 |
| K101H | I178F | 1  | 180  | 26  | 0.00 | 0.00 | 0.00 | 0.63  | 0.53 |
| V106I | D237E | 8  | 801  | 150 | 0.01 | 0.01 | 0.00 | -0.63 | 0.53 |
| L234I | K238T | 0  | 27   | 300 | 0.00 | 0.00 | 0.00 | NA    | 0.53 |
| V90I  | M230L | 8  | 1091 | 104 | 0.01 | 0.01 | 0.00 | -0.63 | 0.53 |
| V106M | K238N | 0  | 163  | 50  | 0.00 | 0.00 | 0.00 | NA    | 0.53 |
| K102N | V106M | 0  | 49   | 164 | 0.00 | 0.00 | 0.00 | NA    | 0.54 |
| V106M | Y318F | 0  | 164  | 49  | 0.00 | 0.00 | 0.00 | NA    | 0.54 |
| G190Q | F227L | 0  | 35   | 228 | 0.00 | 0.00 | 0.00 | NA    | 0.54 |
| K103N | Y188H | 20 | 5557 | 19  | 0.00 | 0.00 | 0.00 | 0.62  | 0.54 |
| G190S | F227Y | 0  | 361  | 22  | 0.00 | 0.00 | 0.00 | NA    | 0.54 |
| V179D | V241M | 0  | 605  | 13  | 0.00 | 0.00 | 0.00 | NA    | 0.54 |
| Y181V | M230L | 0  | 69   | 116 | 0.00 | 0.00 | 0.00 | NA    | 0.54 |
| K102N | D237E | 0  | 49   | 162 | 0.00 | 0.00 | 0.00 | NA    | 0.54 |
| D237E | Y318F | 0  | 162  | 49  | 0.00 | 0.00 | 0.00 | NA    | 0.54 |
| V108I | Y181I | 9  | 1038 | 120 | 0.01 | 0.01 | 0.00 | -0.61 | 0.54 |
| P225H | Y232H | 0  | 338  | 23  | 0.00 | 0.00 | 0.00 | NA    | 0.54 |
| Y188C | K238T | 0  | 26   | 300 | 0.00 | 0.00 | 0.00 | NA    | 0.54 |
| K103S | V179T | 2  | 199  | 73  | 0.01 | 0.00 | 0.01 | 0.61  | 0.54 |
| E138A | Q242L | 2  | 960  | 36  | 0.00 | 0.00 | 0.00 | -0.60 | 0.55 |
| L100I | K103T | 0  | 629  | 12  | 0.00 | 0.00 | 0.00 | NA    | 0.55 |

|              |              |    |      |      |      |      |      |       |      |
|--------------|--------------|----|------|------|------|------|------|-------|------|
| E138Q        | <i>T139R</i> | 0  | 77   | 100  | 0.00 | 0.00 | 0.00 | NA    | 0.55 |
| <i>T139R</i> | <i>K238N</i> | 1  | 99   | 49   | 0.01 | 0.00 | 0.01 | 0.60  | 0.55 |
| K103S        | E138Q        | 2  | 196  | 72   | 0.01 | 0.00 | 0.01 | 0.60  | 0.55 |
| V90I         | <i>I94L</i>  | 7  | 1094 | 56   | 0.01 | 0.00 | 0.00 | 0.60  | 0.55 |
| V179F        | K238T        | 0  | 25   | 300  | 0.00 | 0.00 | 0.00 | NA    | 0.55 |
| <i>T139R</i> | V179T        | 0  | 100  | 76   | 0.00 | 0.00 | 0.00 | NA    | 0.55 |
| P225H        | <i>F227Y</i> | 0  | 338  | 22   | 0.00 | 0.00 | 0.00 | NA    | 0.56 |
| F227L        | <i>D237E</i> | 4  | 223  | 158  | 0.01 | 0.01 | 0.01 | 0.59  | 0.56 |
| <i>K223T</i> | M230L        | 0  | 65   | 116  | 0.00 | 0.00 | 0.00 | NA    | 0.56 |
| <i>I94L</i>  | M230L        | 0  | 65   | 116  | 0.00 | 0.00 | 0.00 | NA    | 0.56 |
| K103T        | V179D        | 0  | 12   | 605  | 0.00 | 0.00 | 0.00 | NA    | 0.56 |
| K101N        | <i>D237E</i> | 0  | 45   | 162  | 0.00 | 0.00 | 0.00 | NA    | 0.57 |
| A98G         | P236L        | 3  | 971  | 24   | 0.00 | 0.00 | 0.00 | 0.57  | 0.57 |
| <i>S105T</i> | K238T        | 0  | 24   | 300  | 0.00 | 0.00 | 0.00 | NA    | 0.57 |
| Y188L        | <i>F227Y</i> | 2  | 721  | 20   | 0.00 | 0.00 | 0.00 | 0.57  | 0.57 |
| V106A        | Y188H        | 0  | 185  | 39   | 0.00 | 0.00 | 0.00 | NA    | 0.57 |
| V179D        | F227L        | 9  | 591  | 219  | 0.01 | 0.01 | 0.00 | -0.57 | 0.57 |
| M230L        | Y318F        | 1  | 115  | 48   | 0.01 | 0.00 | 0.01 | 0.57  | 0.57 |
| V106A        | <i>Q242L</i> | 0  | 185  | 39   | 0.00 | 0.00 | 0.00 | NA    | 0.57 |
| V108I        | E138Q        | 5  | 1037 | 70   | 0.00 | 0.01 | 0.00 | -0.57 | 0.57 |
| A98G         | <i>H221C</i> | 2  | 971  | 14   | 0.00 | 0.00 | 0.00 | 0.57  | 0.57 |
| <i>K101H</i> | Y188L        | 12 | 170  | 710  | 0.01 | 0.01 | 0.00 | 0.56  | 0.57 |
| G190Q        | <i>D237E</i> | 1  | 34   | 161  | 0.01 | 0.00 | 0.01 | 0.56  | 0.57 |
| <i>K101H</i> | Y188H        | 0  | 182  | 39   | 0.00 | 0.00 | 0.00 | NA    | 0.58 |
| K103S        | G190Q        | 0  | 201  | 35   | 0.00 | 0.00 | 0.00 | NA    | 0.58 |
| <i>Y232H</i> | K238T        | 0  | 23   | 300  | 0.00 | 0.00 | 0.00 | NA    | 0.58 |
| K101P        | K103N        | 95 | 132  | 5470 | 0.02 | 0.02 | 0.00 | -0.55 | 0.58 |
| L100I        | E138Q        | 5  | 622  | 72   | 0.01 | 0.01 | 0.00 | 0.55  | 0.58 |
| G190A        | P236L        | 3  | 1901 | 23   | 0.00 | 0.00 | 0.00 | -0.55 | 0.58 |
| <i>I94L</i>  | G190A        | 11 | 50   | 1891 | 0.01 | 0.00 | 0.00 | 0.54  | 0.59 |
| H221Y        | Y318F        | 2  | 717  | 46   | 0.00 | 0.00 | 0.00 | -0.54 | 0.59 |
| Y181I        | <i>K238N</i> | 0  | 135  | 50   | 0.00 | 0.00 | 0.00 | NA    | 0.59 |
| <i>T139R</i> | Y181V        | 0  | 98   | 69   | 0.00 | 0.00 | 0.00 | NA    | 0.59 |
| K101P        | <i>K223T</i> | 2  | 238  | 63   | 0.01 | 0.00 | 0.00 | 0.53  | 0.59 |
| A98G         | G190E        | 3  | 970  | 50   | 0.00 | 0.00 | 0.00 | -0.53 | 0.59 |
| <i>F227Y</i> | K238T        | 0  | 22   | 299  | 0.00 | 0.00 | 0.00 | NA    | 0.6  |
| <i>K102N</i> | Y181I        | 0  | 49   | 135  | 0.00 | 0.00 | 0.00 | NA    | 0.6  |
| Y181I        | Y318F        | 0  | 135  | 49   | 0.00 | 0.00 | 0.00 | NA    | 0.6  |
| V179D        | Y188C        | 2  | 603  | 24   | 0.00 | 0.00 | 0.00 | 0.52  | 0.6  |
| K101P        | <i>L234I</i> | 0  | 240  | 27   | 0.00 | 0.00 | 0.00 | NA    | 0.6  |
| K101P        | <i>I178F</i> | 0  | 240  | 27   | 0.00 | 0.00 | 0.00 | NA    | 0.6  |
| K101P        | P236L        | 0  | 240  | 27   | 0.00 | 0.00 | 0.00 | NA    | 0.6  |

|              |              |    |      |     |      |      |      |       |      |
|--------------|--------------|----|------|-----|------|------|------|-------|------|
| <i>T139R</i> | <i>K223T</i> | 0  | 100  | 65  | 0.00 | 0.00 | 0.00 | NA    | 0.6  |
| G190C        | P225H        | 1  | 18   | 337 | 0.00 | 0.00 | 0.00 | 0.52  | 0.6  |
| V106A        | G190Q        | 0  | 185  | 35  | 0.00 | 0.00 | 0.00 | NA    | 0.6  |
| H221Y        | P236L        | 1  | 717  | 26  | 0.00 | 0.00 | 0.00 | -0.52 | 0.6  |
| <i>I94L</i>  | <i>T139R</i> | 1  | 64   | 98  | 0.01 | 0.00 | 0.01 | 0.52  | 0.6  |
| Y188H        | <i>D237E</i> | 1  | 37   | 161 | 0.01 | 0.00 | 0.01 | 0.51  | 0.61 |
| <i>K101H</i> | G190Q        | 0  | 182  | 35  | 0.00 | 0.00 | 0.00 | NA    | 0.61 |
| <i>D237E</i> | <i>Q242L</i> | 0  | 162  | 39  | 0.00 | 0.00 | 0.00 | NA    | 0.61 |
| K101P        | V179F        | 0  | 240  | 26  | 0.00 | 0.00 | 0.00 | NA    | 0.61 |
| G190E        | M230L        | 0  | 54   | 116 | 0.00 | 0.00 | 0.00 | NA    | 0.62 |
| K101P        | Y188C        | 0  | 239  | 26  | 0.00 | 0.00 | 0.00 | NA    | 0.62 |
| V108I        | <i>I178F</i> | 3  | 1043 | 23  | 0.00 | 0.00 | 0.00 | 0.50  | 0.62 |
| V90I         | K101N        | 5  | 1093 | 40  | 0.00 | 0.00 | 0.00 | 0.50  | 0.62 |
| F227L        | <i>L234I</i> | 0  | 228  | 27  | 0.00 | 0.00 | 0.00 | NA    | 0.62 |
| V106M        | <i>Q242L</i> | 1  | 163  | 38  | 0.00 | 0.00 | 0.00 | 0.49  | 0.62 |
| V179T        | G190S        | 3  | 73   | 356 | 0.01 | 0.00 | 0.00 | 0.49  | 0.62 |
| K101N        | Y181I        | 0  | 45   | 135 | 0.00 | 0.00 | 0.00 | NA    | 0.62 |
| V179F        | F227L        | 0  | 26   | 228 | 0.00 | 0.00 | 0.00 | NA    | 0.63 |
| V106A        | H221Y        | 9  | 172  | 709 | 0.01 | 0.01 | 0.00 | -0.48 | 0.63 |
| Y188C        | H221Y        | 1  | 24   | 718 | 0.00 | 0.00 | 0.00 | -0.48 | 0.63 |
| G190S        | <i>H221C</i> | 0  | 361  | 16  | 0.00 | 0.00 | 0.00 | NA    | 0.64 |
| K101P        | <i>S105T</i> | 0  | 240  | 24  | 0.00 | 0.00 | 0.00 | NA    | 0.64 |
| G190C        | K238T        | 0  | 19   | 300 | 0.00 | 0.00 | 0.00 | NA    | 0.64 |
| E138Q        | V179T        | 0  | 77   | 75  | 0.00 | 0.00 | 0.00 | NA    | 0.64 |
| Y188C        | F227L        | 0  | 25   | 228 | 0.00 | 0.00 | 0.00 | NA    | 0.64 |
| F227L        | P236L        | 0  | 228  | 25  | 0.00 | 0.00 | 0.00 | NA    | 0.64 |
| V106M        | G190Q        | 0  | 164  | 35  | 0.00 | 0.00 | 0.00 | NA    | 0.64 |
| K101E        | E138Q        | 6  | 818  | 70  | 0.01 | 0.01 | 0.00 | 0.46  | 0.65 |
| <i>K102N</i> | M230L        | 0  | 49   | 115 | 0.00 | 0.00 | 0.00 | NA    | 0.65 |
| Y188H        | H221Y        | 3  | 36   | 714 | 0.00 | 0.00 | 0.00 | 0.46  | 0.65 |
| K101P        | <i>Y232H</i> | 0  | 240  | 23  | 0.00 | 0.00 | 0.00 | NA    | 0.65 |
| E138A        | G190Q        | 2  | 958  | 33  | 0.00 | 0.00 | 0.00 | -0.45 | 0.65 |
| <i>H221C</i> | P225H        | 0  | 16   | 338 | 0.00 | 0.00 | 0.00 | NA    | 0.65 |
| Y181C        | F227L        | 51 | 2616 | 174 | 0.02 | 0.02 | 0.00 | 0.45  | 0.65 |
| K103H        | G190S        | 0  | 15   | 362 | 0.00 | 0.00 | 0.00 | NA    | 0.65 |
| K103S        | <i>L234I</i> | 0  | 201  | 27  | 0.00 | 0.00 | 0.00 | NA    | 0.65 |
| K103S        | P236L        | 0  | 200  | 27  | 0.00 | 0.00 | 0.00 | NA    | 0.66 |
| Y181I        | G190E        | 1  | 134  | 53  | 0.01 | 0.00 | 0.01 | 0.44  | 0.66 |
| <i>T139R</i> | G190E        | 0  | 100  | 54  | 0.00 | 0.00 | 0.00 | NA    | 0.66 |
| K101N        | V106M        | 1  | 44   | 160 | 0.00 | 0.00 | 0.00 | 0.44  | 0.66 |
| V106I        | <i>F227Y</i> | 1  | 815  | 21  | 0.00 | 0.00 | 0.00 | -0.44 | 0.66 |
| M230L        | <i>D237E</i> | 1  | 114  | 161 | 0.00 | 0.01 | 0.00 | -0.44 | 0.66 |

|       |       |    |      |      |      |      |      |       |      |
|-------|-------|----|------|------|------|------|------|-------|------|
| E138Q | Y181V | 0  | 77   | 69   | 0.00 | 0.00 | 0.00 | NA    | 0.66 |
| K103N | H221C | 6  | 5587 | 10   | 0.00 | 0.00 | 0.00 | -0.43 | 0.66 |
| K101P | F227Y | 0  | 239  | 22   | 0.00 | 0.00 | 0.00 | NA    | 0.66 |
| F227L | Y232H | 0  | 228  | 23   | 0.00 | 0.00 | 0.00 | NA    | 0.66 |
| K101H | T139R | 2  | 180  | 97   | 0.01 | 0.00 | 0.01 | 0.43  | 0.66 |
| Y181I | Y188H | 0  | 135  | 39   | 0.00 | 0.00 | 0.00 | NA    | 0.66 |
| K103S | Y188C | 0  | 201  | 26   | 0.00 | 0.00 | 0.00 | NA    | 0.67 |
| Y181I | Q242L | 0  | 135  | 39   | 0.00 | 0.00 | 0.00 | NA    | 0.67 |
| V179T | Y181V | 0  | 76   | 69   | 0.00 | 0.00 | 0.00 | NA    | 0.67 |
| K101N | M230L | 0  | 45   | 116  | 0.00 | 0.00 | 0.00 | NA    | 0.67 |
| K101E | F227L | 16 | 804  | 206  | 0.02 | 0.01 | 0.00 | 0.43  | 0.67 |
| K101E | F227Y | 1  | 827  | 21   | 0.00 | 0.00 | 0.00 | -0.43 | 0.67 |
| A98G  | G190C | 1  | 969  | 18   | 0.00 | 0.00 | 0.00 | -0.43 | 0.67 |
| K103H | P225H | 0  | 15   | 337  | 0.00 | 0.00 | 0.00 | NA    | 0.67 |
| E138A | G190C | 1  | 960  | 18   | 0.00 | 0.00 | 0.00 | -0.42 | 0.67 |
| K103S | V179F | 0  | 201  | 25   | 0.00 | 0.00 | 0.00 | NA    | 0.68 |
| K102N | G190S | 1  | 48   | 360  | 0.00 | 0.00 | 0.00 | -0.42 | 0.68 |
| I94L  | E138Q | 0  | 65   | 77   | 0.00 | 0.00 | 0.00 | NA    | 0.68 |
| V106A | L234I | 0  | 185  | 27   | 0.00 | 0.00 | 0.00 | NA    | 0.68 |
| V106A | P225H | 4  | 180  | 332  | 0.01 | 0.01 | 0.00 | -0.41 | 0.68 |
| V106A | I178F | 0  | 184  | 27   | 0.00 | 0.00 | 0.00 | NA    | 0.68 |
| Y181C | K238N | 9  | 2672 | 39   | 0.00 | 0.00 | 0.00 | -0.41 | 0.68 |
| E138Q | K223T | 0  | 76   | 65   | 0.00 | 0.00 | 0.00 | NA    | 0.68 |
| I94L  | V179T | 0  | 65   | 76   | 0.00 | 0.00 | 0.00 | NA    | 0.68 |
| G190S | K238N | 1  | 361  | 49   | 0.00 | 0.00 | 0.00 | -0.41 | 0.68 |
| K101H | L234I | 0  | 182  | 27   | 0.00 | 0.00 | 0.00 | NA    | 0.68 |
| K101H | P236L | 0  | 182  | 27   | 0.00 | 0.00 | 0.00 | NA    | 0.68 |
| K102N | Y181C | 9  | 39   | 2674 | 0.00 | 0.00 | 0.00 | -0.41 | 0.68 |
| K102N | T139R | 0  | 49   | 100  | 0.00 | 0.00 | 0.00 | NA    | 0.68 |
| T139R | Y318F | 0  | 100  | 49   | 0.00 | 0.00 | 0.00 | NA    | 0.68 |
| E138A | G190E | 5  | 954  | 49   | 0.00 | 0.00 | 0.00 | 0.40  | 0.69 |
| K103S | S105T | 0  | 201  | 24   | 0.00 | 0.00 | 0.00 | NA    | 0.69 |
| V106A | V179F | 0  | 185  | 26   | 0.00 | 0.00 | 0.00 | NA    | 0.69 |
| V106A | Y188C | 0  | 185  | 26   | 0.00 | 0.00 | 0.00 | NA    | 0.69 |
| V179T | K223T | 0  | 75   | 64   | 0.00 | 0.00 | 0.00 | NA    | 0.69 |
| K103S | Y188H | 1  | 199  | 38   | 0.00 | 0.00 | 0.00 | 0.40  | 0.69 |
| G190S | V241M | 0  | 362  | 13   | 0.00 | 0.00 | 0.00 | NA    | 0.69 |
| K101H | V179F | 0  | 182  | 26   | 0.00 | 0.00 | 0.00 | NA    | 0.69 |
| K101H | Y188C | 0  | 182  | 26   | 0.00 | 0.00 | 0.00 | NA    | 0.69 |
| Y181I | G190Q | 0  | 135  | 35   | 0.00 | 0.00 | 0.00 | NA    | 0.69 |
| K103S | Y232H | 0  | 201  | 23   | 0.00 | 0.00 | 0.00 | NA    | 0.7  |
| V106A | D237E | 3  | 181  | 158  | 0.01 | 0.01 | 0.01 | 0.39  | 0.7  |

|              |              |    |      |      |      |      |      |       |      |
|--------------|--------------|----|------|------|------|------|------|-------|------|
| K101P        | G190C        | 0  | 240  | 19   | 0.00 | 0.00 | 0.00 | NA    | 0.7  |
| P236L        | K238T        | 1  | 26   | 299  | 0.00 | 0.00 | 0.00 | 0.38  | 0.7  |
| <i>H221C</i> | K238T        | 0  | 15   | 300  | 0.00 | 0.00 | 0.00 | NA    | 0.7  |
| K103H        | K238T        | 0  | 15   | 300  | 0.00 | 0.00 | 0.00 | NA    | 0.7  |
| H221Y        | <i>D237E</i> | 8  | 707  | 152  | 0.01 | 0.01 | 0.00 | -0.38 | 0.7  |
| K101E        | <i>K238N</i> | 4  | 825  | 46   | 0.00 | 0.00 | 0.00 | 0.38  | 0.7  |
| M230L        | <i>Q242L</i> | 0  | 116  | 39   | 0.00 | 0.00 | 0.00 | NA    | 0.7  |
| P225H        | <i>V241M</i> | 0  | 338  | 13   | 0.00 | 0.00 | 0.00 | NA    | 0.71 |
| Y181V        | <i>K223T</i> | 0  | 69   | 65   | 0.00 | 0.00 | 0.00 | NA    | 0.71 |
| G190A        | K238T        | 42 | 1852 | 252  | 0.02 | 0.02 | 0.00 | -0.38 | 0.71 |
| <i>I94L</i>  | Y181V        | 0  | 65   | 69   | 0.00 | 0.00 | 0.00 | NA    | 0.71 |
| K103S        | <i>F227Y</i> | 0  | 201  | 22   | 0.00 | 0.00 | 0.00 | NA    | 0.71 |
| V106M        | <i>L234I</i> | 0  | 164  | 27   | 0.00 | 0.00 | 0.00 | NA    | 0.71 |
| V106M        | <i>I178F</i> | 0  | 164  | 27   | 0.00 | 0.00 | 0.00 | NA    | 0.71 |
| <i>L234I</i> | <i>D237E</i> | 0  | 27   | 162  | 0.00 | 0.00 | 0.00 | NA    | 0.71 |
| K103T        | G190S        | 0  | 12   | 362  | 0.00 | 0.00 | 0.00 | NA    | 0.71 |
| P236L        | <i>D237E</i> | 0  | 27   | 162  | 0.00 | 0.00 | 0.00 | NA    | 0.71 |
| G190C        | F227L        | 0  | 19   | 228  | 0.00 | 0.00 | 0.00 | NA    | 0.71 |
| <i>I178F</i> | <i>D237E</i> | 0  | 27   | 161  | 0.00 | 0.00 | 0.00 | NA    | 0.71 |
| <i>K101H</i> | <i>S105T</i> | 0  | 181  | 24   | 0.00 | 0.00 | 0.00 | NA    | 0.71 |
| <i>K223T</i> | K238T        | 2  | 62   | 298  | 0.01 | 0.00 | 0.00 | 0.37  | 0.71 |
| V179T        | F227L        | 1  | 75   | 227  | 0.00 | 0.00 | 0.00 | -0.37 | 0.71 |
| V108I        | <i>T139R</i> | 7  | 1039 | 89   | 0.01 | 0.01 | 0.00 | -0.36 | 0.72 |
| K103T        | Y181C        | 2  | 10   | 2683 | 0.00 | 0.00 | 0.00 | -0.36 | 0.72 |
| V106M        | V179F        | 0  | 164  | 26   | 0.00 | 0.00 | 0.00 | NA    | 0.72 |
| <i>S105T</i> | P225H        | 1  | 23   | 337  | 0.00 | 0.00 | 0.00 | 0.36  | 0.72 |
| V179F        | <i>D237E</i> | 0  | 26   | 162  | 0.00 | 0.00 | 0.00 | NA    | 0.72 |
| Y188C        | <i>D237E</i> | 0  | 26   | 162  | 0.00 | 0.00 | 0.00 | NA    | 0.72 |
| <i>I94L</i>  | <i>K223T</i> | 0  | 65   | 65   | 0.00 | 0.00 | 0.00 | NA    | 0.72 |
| K101E        | <i>D237E</i> | 9  | 811  | 147  | 0.01 | 0.01 | 0.00 | -0.36 | 0.72 |
| <i>K101H</i> | <i>Y232H</i> | 0  | 182  | 23   | 0.00 | 0.00 | 0.00 | NA    | 0.72 |
| E138Q        | F227L        | 1  | 76   | 227  | 0.00 | 0.00 | 0.00 | -0.35 | 0.72 |
| K101N        | Y188L        | 2  | 43   | 717  | 0.00 | 0.00 | 0.00 | -0.35 | 0.73 |
| V179T        | G190E        | 0  | 76   | 54   | 0.00 | 0.00 | 0.00 | NA    | 0.73 |
| V106A        | <i>F227Y</i> | 0  | 185  | 22   | 0.00 | 0.00 | 0.00 | NA    | 0.73 |
| E138Q        | G190E        | 0  | 77   | 53   | 0.00 | 0.00 | 0.00 | NA    | 0.73 |
| V108I        | <i>H221C</i> | 1  | 1046 | 15   | 0.00 | 0.00 | 0.00 | -0.35 | 0.73 |
| G190Q        | M230L        | 0  | 35   | 116  | 0.00 | 0.00 | 0.00 | NA    | 0.73 |
| G190A        | <i>Y232H</i> | 4  | 1899 | 18   | 0.00 | 0.00 | 0.00 | 0.34  | 0.73 |
| K103T        | Y188L        | 1  | 11   | 722  | 0.00 | 0.00 | 0.00 | 0.34  | 0.73 |
| <i>S105T</i> | V106M        | 0  | 24   | 164  | 0.00 | 0.00 | 0.00 | NA    | 0.74 |
| <i>S105T</i> | <i>D237E</i> | 0  | 24   | 162  | 0.00 | 0.00 | 0.00 | NA    | 0.74 |

|              |              |    |      |     |      |      |      |       |      |
|--------------|--------------|----|------|-----|------|------|------|-------|------|
| <i>T139R</i> | <i>Q242L</i> | 0  | 100  | 39  | 0.00 | 0.00 | 0.00 | NA    | 0.74 |
| <i>T139R</i> | Y188H        | 0  | 99   | 39  | 0.00 | 0.00 | 0.00 | NA    | 0.74 |
| K101P        | <i>H221C</i> | 0  | 239  | 16  | 0.00 | 0.00 | 0.00 | NA    | 0.74 |
| K103S        | G190C        | 0  | 201  | 19  | 0.00 | 0.00 | 0.00 | NA    | 0.74 |
| <i>I94L</i>  | Y188L        | 3  | 62   | 714 | 0.00 | 0.00 | 0.00 | -0.33 | 0.74 |
| E138Q        | <i>K238N</i> | 0  | 76   | 50  | 0.00 | 0.00 | 0.00 | NA    | 0.74 |
| A98G         | Y181V        | 6  | 968  | 63  | 0.01 | 0.01 | 0.00 | 0.33  | 0.74 |
| V179T        | <i>K238N</i> | 0  | 76   | 50  | 0.00 | 0.00 | 0.00 | NA    | 0.74 |
| A98G         | <i>K101H</i> | 15 | 954  | 167 | 0.01 | 0.01 | 0.00 | 0.32  | 0.75 |
| E138Q        | M230L        | 1  | 76   | 115 | 0.01 | 0.00 | 0.01 | 0.32  | 0.75 |
| <i>K101H</i> | Y318F        | 1  | 181  | 48  | 0.00 | 0.00 | 0.00 | 0.32  | 0.75 |
| <i>K102N</i> | E138Q        | 0  | 49   | 77  | 0.00 | 0.00 | 0.00 | NA    | 0.75 |
| <i>Y232H</i> | <i>D237E</i> | 0  | 23   | 162 | 0.00 | 0.00 | 0.00 | NA    | 0.75 |
| <i>K102N</i> | V179T        | 0  | 49   | 76  | 0.00 | 0.00 | 0.00 | NA    | 0.75 |
| V179T        | Y318F        | 0  | 76   | 49  | 0.00 | 0.00 | 0.00 | NA    | 0.75 |
| Y181V        | G190E        | 0  | 69   | 54  | 0.00 | 0.00 | 0.00 | NA    | 0.75 |
| V106I        | G190S        | 24 | 790  | 329 | 0.02 | 0.02 | 0.00 | 0.31  | 0.75 |
| Y181I        | <i>L234I</i> | 0  | 135  | 27  | 0.00 | 0.00 | 0.00 | NA    | 0.75 |
| <i>I178F</i> | Y181I        | 0  | 27   | 135 | 0.00 | 0.00 | 0.00 | NA    | 0.75 |
| Y181I        | P236L        | 0  | 135  | 27  | 0.00 | 0.00 | 0.00 | NA    | 0.75 |
| K101P        | K103H        | 0  | 240  | 15  | 0.00 | 0.00 | 0.00 | NA    | 0.76 |
| V106M        | <i>F227Y</i> | 0  | 164  | 22  | 0.00 | 0.00 | 0.00 | NA    | 0.76 |
| V106M        | <i>Y232H</i> | 0  | 164  | 22  | 0.00 | 0.00 | 0.00 | NA    | 0.76 |
| K101E        | <i>S105T</i> | 2  | 828  | 22  | 0.00 | 0.00 | 0.00 | 0.31  | 0.76 |
| <i>F227Y</i> | <i>D237E</i> | 0  | 22   | 162 | 0.00 | 0.00 | 0.00 | NA    | 0.76 |
| Y181C        | <i>F227Y</i> | 4  | 2676 | 18  | 0.00 | 0.00 | 0.00 | -0.31 | 0.76 |
| V106A        | G190C        | 0  | 185  | 19  | 0.00 | 0.00 | 0.00 | NA    | 0.76 |
| V179F        | Y181I        | 0  | 26   | 135 | 0.00 | 0.00 | 0.00 | NA    | 0.76 |
| Y181I        | Y188C        | 0  | 135  | 26  | 0.00 | 0.00 | 0.00 | NA    | 0.76 |
| G190E        | <i>K223T</i> | 0  | 54   | 65  | 0.00 | 0.00 | 0.00 | NA    | 0.76 |
| <i>T139R</i> | G190Q        | 0  | 100  | 35  | 0.00 | 0.00 | 0.00 | NA    | 0.76 |
| K101N        | E138Q        | 0  | 45   | 77  | 0.00 | 0.00 | 0.00 | NA    | 0.76 |
| <i>K101H</i> | G190C        | 0  | 182  | 19  | 0.00 | 0.00 | 0.00 | NA    | 0.76 |
| K103H        | F227L        | 0  | 15   | 228 | 0.00 | 0.00 | 0.00 | NA    | 0.77 |
| Y181V        | <i>K238N</i> | 0  | 69   | 50  | 0.00 | 0.00 | 0.00 | NA    | 0.77 |
| K101N        | V179T        | 0  | 45   | 76  | 0.00 | 0.00 | 0.00 | NA    | 0.77 |
| A98G         | K101N        | 4  | 966  | 41  | 0.00 | 0.00 | 0.00 | 0.30  | 0.77 |
| V90I         | K103H        | 1  | 1101 | 14  | 0.00 | 0.00 | 0.00 | -0.29 | 0.77 |
| <i>T139R</i> | <i>D237E</i> | 1  | 99   | 161 | 0.00 | 0.00 | 0.00 | -0.29 | 0.77 |
| <i>K102N</i> | Y181V        | 0  | 49   | 69  | 0.00 | 0.00 | 0.00 | NA    | 0.77 |
| Y181V        | Y318F        | 0  | 69   | 49  | 0.00 | 0.00 | 0.00 | NA    | 0.77 |
| P225H        | <i>K238N</i> | 1  | 334  | 49  | 0.00 | 0.00 | 0.00 | -0.29 | 0.77 |

|       |       |   |      |     |      |      |      |       |      |
|-------|-------|---|------|-----|------|------|------|-------|------|
| P225H | Y318F | 1 | 337  | 48  | 0.00 | 0.00 | 0.00 | -0.29 | 0.77 |
| K102N | V106A | 1 | 48   | 184 | 0.00 | 0.00 | 0.00 | 0.29  | 0.77 |
| V106I | Y188H | 3 | 812  | 36  | 0.00 | 0.00 | 0.00 | 0.29  | 0.77 |
| K103S | V106M | 3 | 198  | 157 | 0.01 | 0.01 | 0.00 | 0.28  | 0.78 |
| K223T | K238N | 0 | 65   | 50  | 0.00 | 0.00 | 0.00 | NA    | 0.78 |
| K103S | H221C | 0 | 201  | 16  | 0.00 | 0.00 | 0.00 | NA    | 0.78 |
| L100I | M230L | 5 | 623  | 111 | 0.01 | 0.01 | 0.00 | -0.28 | 0.78 |
| L100I | K103S | 9 | 616  | 191 | 0.01 | 0.01 | 0.00 | -0.28 | 0.78 |
| I94L  | K238N | 0 | 65   | 49  | 0.00 | 0.00 | 0.00 | NA    | 0.78 |
| K102N | K223T | 0 | 49   | 65  | 0.00 | 0.00 | 0.00 | NA    | 0.78 |
| H221Y | Y232H | 1 | 718  | 21  | 0.00 | 0.00 | 0.00 | -0.27 | 0.78 |
| K101P | V241M | 0 | 240  | 13  | 0.00 | 0.00 | 0.00 | NA    | 0.78 |
| I94L  | K102N | 0 | 64   | 49  | 0.00 | 0.00 | 0.00 | NA    | 0.78 |
| I178F | M230L | 0 | 27   | 116 | 0.00 | 0.00 | 0.00 | NA    | 0.79 |
| M230L | P236L | 0 | 116  | 27  | 0.00 | 0.00 | 0.00 | NA    | 0.79 |
| V106M | G190C | 0 | 164  | 19  | 0.00 | 0.00 | 0.00 | NA    | 0.79 |
| K101N | Y181V | 0 | 45   | 69  | 0.00 | 0.00 | 0.00 | NA    | 0.79 |
| P225H | L234I | 1 | 337  | 26  | 0.00 | 0.00 | 0.00 | 0.27  | 0.79 |
| G190C | D237E | 0 | 19   | 162 | 0.00 | 0.00 | 0.00 | NA    | 0.79 |
| K101P | Q242L | 1 | 238  | 38  | 0.00 | 0.00 | 0.00 | 0.27  | 0.79 |
| V179F | M230L | 0 | 26   | 116 | 0.00 | 0.00 | 0.00 | NA    | 0.79 |
| Y188C | M230L | 0 | 26   | 116 | 0.00 | 0.00 | 0.00 | NA    | 0.79 |
| E138Q | Y188H | 0 | 77   | 39  | 0.00 | 0.00 | 0.00 | NA    | 0.79 |
| E138Q | Q242L | 0 | 77   | 39  | 0.00 | 0.00 | 0.00 | NA    | 0.79 |
| F227L | V241M | 0 | 228  | 13  | 0.00 | 0.00 | 0.00 | NA    | 0.79 |
| K103T | V106I | 1 | 11   | 815 | 0.00 | 0.00 | 0.00 | 0.26  | 0.79 |
| V179T | Y188H | 0 | 76   | 39  | 0.00 | 0.00 | 0.00 | NA    | 0.8  |
| K101N | K223T | 0 | 45   | 65  | 0.00 | 0.00 | 0.00 | NA    | 0.8  |
| I94L  | K101N | 0 | 65   | 45  | 0.00 | 0.00 | 0.00 | NA    | 0.8  |
| K101H | H221C | 0 | 182  | 16  | 0.00 | 0.00 | 0.00 | NA    | 0.8  |
| V179T | Q242L | 0 | 76   | 38  | 0.00 | 0.00 | 0.00 | NA    | 0.8  |
| V106I | Q242L | 2 | 814  | 35  | 0.00 | 0.00 | 0.00 | -0.25 | 0.8  |
| V90I  | G190C | 2 | 1100 | 17  | 0.00 | 0.00 | 0.00 | 0.25  | 0.81 |
| H221Y | V241M | 1 | 717  | 12  | 0.00 | 0.00 | 0.00 | 0.25  | 0.81 |
| K103H | V106A | 0 | 15   | 185 | 0.00 | 0.00 | 0.00 | NA    | 0.81 |
| K103T | F227L | 0 | 12   | 228 | 0.00 | 0.00 | 0.00 | NA    | 0.81 |
| L100I | Y318F | 2 | 626  | 46  | 0.00 | 0.00 | 0.00 | -0.24 | 0.81 |
| G190E | K238N | 0 | 54   | 50  | 0.00 | 0.00 | 0.00 | NA    | 0.81 |
| T139R | L234I | 0 | 100  | 27  | 0.00 | 0.00 | 0.00 | NA    | 0.81 |
| T139R | I178F | 0 | 100  | 27  | 0.00 | 0.00 | 0.00 | NA    | 0.81 |
| T139R | P236L | 0 | 100  | 27  | 0.00 | 0.00 | 0.00 | NA    | 0.81 |
| E138Q | G190Q | 0 | 77   | 35  | 0.00 | 0.00 | 0.00 | NA    | 0.81 |

|       |       |    |      |      |      |      |      |       |      |
|-------|-------|----|------|------|------|------|------|-------|------|
| Y181V | Y188H | 0  | 69   | 39   | 0.00 | 0.00 | 0.00 | NA    | 0.81 |
| Y181V | Q242L | 0  | 69   | 39   | 0.00 | 0.00 | 0.00 | NA    | 0.81 |
| V179T | G190Q | 0  | 76   | 35   | 0.00 | 0.00 | 0.00 | NA    | 0.81 |
| K102N | G190E | 0  | 49   | 54   | 0.00 | 0.00 | 0.00 | NA    | 0.82 |
| G190E | Y318F | 0  | 54   | 49   | 0.00 | 0.00 | 0.00 | NA    | 0.82 |
| K103S | V241M | 0  | 201  | 13   | 0.00 | 0.00 | 0.00 | NA    | 0.82 |
| V106M | H221C | 0  | 164  | 16   | 0.00 | 0.00 | 0.00 | NA    | 0.82 |
| V179D | H221C | 1  | 603  | 15   | 0.00 | 0.00 | 0.00 | 0.23  | 0.82 |
| H221C | D237E | 0  | 16   | 162  | 0.00 | 0.00 | 0.00 | NA    | 0.82 |
| T139R | Y188C | 0  | 100  | 26   | 0.00 | 0.00 | 0.00 | NA    | 0.82 |
| Y188H | K223T | 0  | 39   | 65   | 0.00 | 0.00 | 0.00 | NA    | 0.82 |
| I94L  | Y188H | 0  | 65   | 39   | 0.00 | 0.00 | 0.00 | NA    | 0.82 |
| M230L | Y232H | 0  | 115  | 22   | 0.00 | 0.00 | 0.00 | NA    | 0.82 |
| A98G  | H221Y | 56 | 899  | 655  | 0.03 | 0.03 | 0.00 | 0.22  | 0.82 |
| K101P | G190A | 34 | 201  | 1859 | 0.02 | 0.02 | 0.00 | -0.22 | 0.82 |
| A98G  | F227Y | 2  | 969  | 20   | 0.00 | 0.00 | 0.00 | 0.22  | 0.82 |
| I94L  | Q242L | 0  | 64   | 39   | 0.00 | 0.00 | 0.00 | NA    | 0.82 |
| G190S | D237E | 5  | 354  | 157  | 0.01 | 0.01 | 0.00 | 0.22  | 0.83 |
| K103H | V106M | 0  | 15   | 164  | 0.00 | 0.00 | 0.00 | NA    | 0.83 |
| K102N | K238N | 0  | 49   | 50   | 0.00 | 0.00 | 0.00 | NA    | 0.83 |
| V179T | Y181C | 15 | 60   | 2665 | 0.01 | 0.01 | 0.00 | -0.22 | 0.83 |
| K238N | Y318F | 0  | 50   | 49   | 0.00 | 0.00 | 0.00 | NA    | 0.83 |
| K103N | S105T | 9  | 5585 | 13   | 0.00 | 0.00 | 0.00 | -0.22 | 0.83 |
| K103H | D237E | 0  | 15   | 162  | 0.00 | 0.00 | 0.00 | NA    | 0.83 |
| F227Y | M230L | 0  | 21   | 116  | 0.00 | 0.00 | 0.00 | NA    | 0.83 |
| K101N | G190E | 0  | 45   | 54   | 0.00 | 0.00 | 0.00 | NA    | 0.83 |
| V106A | V241M | 0  | 185  | 13   | 0.00 | 0.00 | 0.00 | NA    | 0.83 |
| Y181V | G190Q | 0  | 69   | 35   | 0.00 | 0.00 | 0.00 | NA    | 0.83 |
| K102N | Y318F | 0  | 49   | 49   | 0.00 | 0.00 | 0.00 | NA    | 0.83 |
| K101H | V241M | 0  | 182  | 13   | 0.00 | 0.00 | 0.00 | NA    | 0.83 |
| S105T | T139R | 0  | 24   | 99   | 0.00 | 0.00 | 0.00 | NA    | 0.83 |
| A98G  | G190Q | 3  | 970  | 32   | 0.00 | 0.00 | 0.00 | 0.21  | 0.83 |
| K102N | V179D | 2  | 47   | 602  | 0.00 | 0.00 | 0.00 | -0.20 | 0.84 |
| T139R | Y232H | 0  | 99   | 23   | 0.00 | 0.00 | 0.00 | NA    | 0.84 |
| G190Q | K223T | 0  | 35   | 65   | 0.00 | 0.00 | 0.00 | NA    | 0.84 |
| K101N | K238N | 0  | 45   | 50   | 0.00 | 0.00 | 0.00 | NA    | 0.84 |
| K101N | Y318F | 0  | 45   | 49   | 0.00 | 0.00 | 0.00 | NA    | 0.84 |
| G190C | M230L | 0  | 19   | 116  | 0.00 | 0.00 | 0.00 | NA    | 0.84 |
| T139R | F227Y | 0  | 100  | 22   | 0.00 | 0.00 | 0.00 | NA    | 0.84 |
| K101H | K103T | 0  | 182  | 12   | 0.00 | 0.00 | 0.00 | NA    | 0.84 |
| I94L  | D237E | 1  | 63   | 161  | 0.00 | 0.00 | 0.00 | 0.20  | 0.85 |
| K101N | K102N | 0  | 44   | 49   | 0.00 | 0.00 | 0.00 | NA    | 0.85 |



|              |              |   |     |     |      |      |      |       |      |
|--------------|--------------|---|-----|-----|------|------|------|-------|------|
| <i>I94L</i>  | G190Q        | 0 | 65  | 33  | 0.00 | 0.00 | 0.00 | NA    | 0.85 |
| Y188H        | G190E        | 0 | 39  | 54  | 0.00 | 0.00 | 0.00 | NA    | 0.85 |
| G190E        | <i>Q242L</i> | 0 | 54  | 39  | 0.00 | 0.00 | 0.00 | NA    | 0.85 |
| E138Q        | <i>L234I</i> | 0 | 77  | 27  | 0.00 | 0.00 | 0.00 | NA    | 0.85 |
| E138Q        | <i>I178F</i> | 0 | 77  | 27  | 0.00 | 0.00 | 0.00 | NA    | 0.85 |
| E138Q        | P236L        | 0 | 77  | 27  | 0.00 | 0.00 | 0.00 | NA    | 0.85 |
| <i>I178F</i> | V179T        | 0 | 27  | 76  | 0.00 | 0.00 | 0.00 | NA    | 0.85 |
| V179T        | <i>L234I</i> | 0 | 76  | 27  | 0.00 | 0.00 | 0.00 | NA    | 0.85 |
| V179T        | P236L        | 0 | 76  | 27  | 0.00 | 0.00 | 0.00 | NA    | 0.85 |
| K101E        | <i>I178F</i> | 2 | 827 | 25  | 0.00 | 0.00 | 0.00 | 0.18  | 0.85 |
| K103H        | Y181I        | 0 | 15  | 135 | 0.00 | 0.00 | 0.00 | NA    | 0.86 |
| K101N        | P225H        | 1 | 44  | 335 | 0.00 | 0.00 | 0.00 | -0.18 | 0.86 |
| E138Q        | V179F        | 0 | 77  | 26  | 0.00 | 0.00 | 0.00 | NA    | 0.86 |
| E138Q        | Y188C        | 0 | 77  | 26  | 0.00 | 0.00 | 0.00 | NA    | 0.86 |
| A98G         | Y318F        | 4 | 968 | 45  | 0.00 | 0.00 | 0.00 | 0.18  | 0.86 |
| K103T        | V106M        | 0 | 12  | 163 | 0.00 | 0.00 | 0.00 | NA    | 0.86 |
| Y188H        | <i>K238N</i> | 0 | 39  | 50  | 0.00 | 0.00 | 0.00 | NA    | 0.86 |
| K103T        | <i>D237E</i> | 0 | 12  | 162 | 0.00 | 0.00 | 0.00 | NA    | 0.86 |
| <i>K238N</i> | <i>Q242L</i> | 0 | 50  | 39  | 0.00 | 0.00 | 0.00 | NA    | 0.86 |
| V106M        | <i>K223T</i> | 1 | 163 | 64  | 0.00 | 0.00 | 0.00 | 0.18  | 0.86 |
| V179T        | Y188C        | 0 | 74  | 26  | 0.00 | 0.00 | 0.00 | NA    | 0.86 |
| P225H        | K238T        | 8 | 323 | 282 | 0.01 | 0.01 | 0.00 | 0.17  | 0.86 |
| <i>K102N</i> | Y188H        | 0 | 49  | 39  | 0.00 | 0.00 | 0.00 | NA    | 0.86 |
| Y188H        | Y318F        | 0 | 39  | 49  | 0.00 | 0.00 | 0.00 | NA    | 0.86 |
| <i>K102N</i> | <i>Q242L</i> | 0 | 49  | 39  | 0.00 | 0.00 | 0.00 | NA    | 0.86 |
| <i>Q242L</i> | Y318F        | 0 | 39  | 49  | 0.00 | 0.00 | 0.00 | NA    | 0.86 |
| <i>T139R</i> | G190C        | 0 | 100 | 19  | 0.00 | 0.00 | 0.00 | NA    | 0.86 |
| Y181V        | <i>L234I</i> | 0 | 69  | 27  | 0.00 | 0.00 | 0.00 | NA    | 0.87 |
| Y181V        | P236L        | 0 | 69  | 27  | 0.00 | 0.00 | 0.00 | NA    | 0.87 |
| <i>S105T</i> | E138Q        | 0 | 24  | 76  | 0.00 | 0.00 | 0.00 | NA    | 0.87 |
| K101E        | P236L        | 2 | 828 | 25  | 0.00 | 0.00 | 0.00 | 0.16  | 0.87 |
| V179F        | Y181V        | 0 | 26  | 69  | 0.00 | 0.00 | 0.00 | NA    | 0.87 |
| Y181V        | Y188C        | 0 | 69  | 26  | 0.00 | 0.00 | 0.00 | NA    | 0.87 |
| E138Q        | <i>Y232H</i> | 0 | 77  | 23  | 0.00 | 0.00 | 0.00 | NA    | 0.87 |
| K101N        | Y188H        | 0 | 45  | 39  | 0.00 | 0.00 | 0.00 | NA    | 0.87 |
| K101N        | <i>Q242L</i> | 0 | 45  | 39  | 0.00 | 0.00 | 0.00 | NA    | 0.87 |
| Y181I        | <i>V241M</i> | 0 | 135 | 13  | 0.00 | 0.00 | 0.00 | NA    | 0.87 |
| <i>I94L</i>  | <i>L234I</i> | 0 | 65  | 27  | 0.00 | 0.00 | 0.00 | NA    | 0.87 |
| <i>I178F</i> | <i>K223T</i> | 0 | 27  | 65  | 0.00 | 0.00 | 0.00 | NA    | 0.87 |
| <i>K223T</i> | P236L        | 0 | 65  | 27  | 0.00 | 0.00 | 0.00 | NA    | 0.87 |
| <i>I94L</i>  | P236L        | 0 | 65  | 27  | 0.00 | 0.00 | 0.00 | NA    | 0.87 |
| G190Q        | <i>K238N</i> | 0 | 35  | 50  | 0.00 | 0.00 | 0.00 | NA    | 0.87 |

|       |       |   |     |     |      |      |      |       |      |
|-------|-------|---|-----|-----|------|------|------|-------|------|
| V179T | Y232H | 0 | 76  | 23  | 0.00 | 0.00 | 0.00 | NA    | 0.87 |
| K103H | M230L | 0 | 15  | 116 | 0.00 | 0.00 | 0.00 | NA    | 0.87 |
| K102N | G190Q | 0 | 49  | 35  | 0.00 | 0.00 | 0.00 | NA    | 0.88 |
| G190Q | Y318F | 0 | 35  | 49  | 0.00 | 0.00 | 0.00 | NA    | 0.88 |
| E138Q | F227Y | 0 | 77  | 22  | 0.00 | 0.00 | 0.00 | NA    | 0.88 |
| L100I | V179T | 4 | 620 | 72  | 0.01 | 0.01 | 0.00 | 0.15  | 0.88 |
| V179F | K223T | 0 | 26  | 65  | 0.00 | 0.00 | 0.00 | NA    | 0.88 |
| I94L  | V179F | 0 | 65  | 26  | 0.00 | 0.00 | 0.00 | NA    | 0.88 |
| I94L  | Y188C | 0 | 65  | 26  | 0.00 | 0.00 | 0.00 | NA    | 0.88 |
| Y188C | K223T | 0 | 26  | 65  | 0.00 | 0.00 | 0.00 | NA    | 0.88 |
| S105T | E138A | 2 | 22  | 960 | 0.00 | 0.00 | 0.00 | 0.15  | 0.88 |
| V179T | F227Y | 0 | 76  | 22  | 0.00 | 0.00 | 0.00 | NA    | 0.88 |
| K102N | K238T | 1 | 48  | 297 | 0.00 | 0.00 | 0.00 | -0.15 | 0.88 |
| S105T | Y181V | 0 | 24  | 69  | 0.00 | 0.00 | 0.00 | NA    | 0.88 |
| K103T | Y181I | 0 | 12  | 135 | 0.00 | 0.00 | 0.00 | NA    | 0.88 |
| T139R | H221C | 0 | 100 | 16  | 0.00 | 0.00 | 0.00 | NA    | 0.88 |
| Y181V | Y232H | 0 | 69  | 23  | 0.00 | 0.00 | 0.00 | NA    | 0.88 |
| K101N | G190Q | 0 | 45  | 35  | 0.00 | 0.00 | 0.00 | NA    | 0.89 |
| A98G  | V179T | 6 | 966 | 69  | 0.01 | 0.01 | 0.00 | 0.14  | 0.89 |
| S105T | K223T | 0 | 24  | 65  | 0.00 | 0.00 | 0.00 | NA    | 0.89 |
| Y188H | Q242L | 0 | 39  | 39  | 0.00 | 0.00 | 0.00 | NA    | 0.89 |
| M230L | V241M | 0 | 116 | 13  | 0.00 | 0.00 | 0.00 | NA    | 0.89 |
| K103H | T139R | 0 | 15  | 100 | 0.00 | 0.00 | 0.00 | NA    | 0.89 |
| I94L  | Y232H | 0 | 65  | 23  | 0.00 | 0.00 | 0.00 | NA    | 0.89 |
| K223T | Y232H | 0 | 65  | 23  | 0.00 | 0.00 | 0.00 | NA    | 0.89 |
| Y181V | F227Y | 0 | 67  | 22  | 0.00 | 0.00 | 0.00 | NA    | 0.89 |
| E138Q | G190C | 0 | 77  | 19  | 0.00 | 0.00 | 0.00 | NA    | 0.89 |
| G190E | L234I | 0 | 54  | 27  | 0.00 | 0.00 | 0.00 | NA    | 0.89 |
| G190E | P236L | 0 | 54  | 27  | 0.00 | 0.00 | 0.00 | NA    | 0.89 |
| K223T | F227Y | 0 | 65  | 22  | 0.00 | 0.00 | 0.00 | NA    | 0.9  |
| I94L  | F227Y | 0 | 65  | 22  | 0.00 | 0.00 | 0.00 | NA    | 0.9  |
| V179F | G190E | 0 | 26  | 54  | 0.00 | 0.00 | 0.00 | NA    | 0.9  |
| Y188C | G190E | 0 | 26  | 54  | 0.00 | 0.00 | 0.00 | NA    | 0.9  |
| Y188H | G190Q | 0 | 39  | 35  | 0.00 | 0.00 | 0.00 | NA    | 0.9  |
| G190Q | Q242L | 0 | 35  | 39  | 0.00 | 0.00 | 0.00 | NA    | 0.9  |
| L234I | K238N | 0 | 27  | 50  | 0.00 | 0.00 | 0.00 | NA    | 0.9  |
| I178F | K238N | 0 | 27  | 50  | 0.00 | 0.00 | 0.00 | NA    | 0.9  |
| P236L | K238N | 0 | 27  | 50  | 0.00 | 0.00 | 0.00 | NA    | 0.9  |
| K102N | L234I | 0 | 49  | 27  | 0.00 | 0.00 | 0.00 | NA    | 0.9  |
| K102N | I178F | 0 | 49  | 27  | 0.00 | 0.00 | 0.00 | NA    | 0.9  |
| K102N | P236L | 0 | 49  | 27  | 0.00 | 0.00 | 0.00 | NA    | 0.9  |
| I178F | Y318F | 0 | 27  | 49  | 0.00 | 0.00 | 0.00 | NA    | 0.9  |

|       |       |    |     |     |      |      |      |       |      |
|-------|-------|----|-----|-----|------|------|------|-------|------|
| Y181V | G190C | 0  | 69  | 19  | 0.00 | 0.00 | 0.00 | NA    | 0.9  |
| V179F | K238N | 0  | 26  | 50  | 0.00 | 0.00 | 0.00 | NA    | 0.9  |
| Y188C | K238N | 0  | 26  | 50  | 0.00 | 0.00 | 0.00 | NA    | 0.9  |
| T139R | V241M | 0  | 100 | 13  | 0.00 | 0.00 | 0.00 | NA    | 0.9  |
| S105T | G190E | 0  | 24  | 54  | 0.00 | 0.00 | 0.00 | NA    | 0.91 |
| K102N | V179F | 0  | 49  | 26  | 0.00 | 0.00 | 0.00 | NA    | 0.91 |
| K102N | Y188C | 0  | 49  | 26  | 0.00 | 0.00 | 0.00 | NA    | 0.91 |
| V179F | Y318F | 0  | 26  | 49  | 0.00 | 0.00 | 0.00 | NA    | 0.91 |
| Y188C | Y318F | 0  | 26  | 49  | 0.00 | 0.00 | 0.00 | NA    | 0.91 |
| I94L  | F227L | 1  | 64  | 227 | 0.00 | 0.00 | 0.00 | -0.12 | 0.91 |
| G190E | Y232H | 0  | 54  | 23  | 0.00 | 0.00 | 0.00 | NA    | 0.91 |
| E138Q | H221C | 0  | 77  | 16  | 0.00 | 0.00 | 0.00 | NA    | 0.91 |
| G190C | K223T | 0  | 19  | 65  | 0.00 | 0.00 | 0.00 | NA    | 0.91 |
| I94L  | G190C | 0  | 65  | 19  | 0.00 | 0.00 | 0.00 | NA    | 0.91 |
| K101N | I178F | 0  | 45  | 27  | 0.00 | 0.00 | 0.00 | NA    | 0.91 |
| K101N | L234I | 0  | 45  | 27  | 0.00 | 0.00 | 0.00 | NA    | 0.91 |
| K101N | P236L | 0  | 45  | 27  | 0.00 | 0.00 | 0.00 | NA    | 0.91 |
| V179T | H221C | 0  | 76  | 16  | 0.00 | 0.00 | 0.00 | NA    | 0.91 |
| S105T | K238N | 0  | 24  | 50  | 0.00 | 0.00 | 0.00 | NA    | 0.91 |
| K103T | T139R | 0  | 12  | 100 | 0.00 | 0.00 | 0.00 | NA    | 0.91 |
| G190E | F227Y | 0  | 54  | 22  | 0.00 | 0.00 | 0.00 | NA    | 0.91 |
| K102N | S105T | 0  | 49  | 24  | 0.00 | 0.00 | 0.00 | NA    | 0.91 |
| S105T | Y318F | 0  | 24  | 49  | 0.00 | 0.00 | 0.00 | NA    | 0.91 |
| K101N | Y188C | 0  | 45  | 26  | 0.00 | 0.00 | 0.00 | NA    | 0.91 |
| K103H | E138Q | 0  | 15  | 77  | 0.00 | 0.00 | 0.00 | NA    | 0.91 |
| Y232H | K238N | 0  | 23  | 50  | 0.00 | 0.00 | 0.00 | NA    | 0.92 |
| E138Q | G190S | 2  | 74  | 357 | 0.00 | 0.00 | 0.00 | -0.11 | 0.92 |
| K103H | V179T | 0  | 15  | 76  | 0.00 | 0.00 | 0.00 | NA    | 0.92 |
| K102N | Y232H | 0  | 49  | 23  | 0.00 | 0.00 | 0.00 | NA    | 0.92 |
| Y232H | Y318F | 0  | 23  | 49  | 0.00 | 0.00 | 0.00 | NA    | 0.92 |
| K102N | F227L | 1  | 48  | 227 | 0.00 | 0.00 | 0.00 | 0.10  | 0.92 |
| Y181V | H221C | 0  | 69  | 16  | 0.00 | 0.00 | 0.00 | NA    | 0.92 |
| F227Y | K238N | 0  | 22  | 50  | 0.00 | 0.00 | 0.00 | NA    | 0.92 |
| K101N | S105T | 0  | 45  | 24  | 0.00 | 0.00 | 0.00 | NA    | 0.92 |
| K102N | F227Y | 0  | 49  | 22  | 0.00 | 0.00 | 0.00 | NA    | 0.92 |
| E138A | Y181I | 10 | 951 | 120 | 0.01 | 0.01 | 0.00 | 0.10  | 0.92 |
| Y188H | L234I | 0  | 39  | 27  | 0.00 | 0.00 | 0.00 | NA    | 0.92 |
| I178F | Y188H | 0  | 27  | 39  | 0.00 | 0.00 | 0.00 | NA    | 0.92 |
| Y188H | P236L | 0  | 39  | 27  | 0.00 | 0.00 | 0.00 | NA    | 0.92 |
| L234I | Q242L | 0  | 27  | 39  | 0.00 | 0.00 | 0.00 | NA    | 0.92 |
| P236L | Q242L | 0  | 27  | 39  | 0.00 | 0.00 | 0.00 | NA    | 0.92 |
| H221C | K223T | 0  | 16  | 65  | 0.00 | 0.00 | 0.00 | NA    | 0.92 |

|              |              |   |      |     |      |      |      |       |      |
|--------------|--------------|---|------|-----|------|------|------|-------|------|
| <i>I94L</i>  | <i>H221C</i> | 0 | 65   | 16  | 0.00 | 0.00 | 0.00 | NA    | 0.92 |
| K101N        | <i>Y232H</i> | 0 | 45   | 23  | 0.00 | 0.00 | 0.00 | NA    | 0.92 |
| K103H        | Y181V        | 0 | 15   | 69  | 0.00 | 0.00 | 0.00 | NA    | 0.92 |
| V179F        | Y188H        | 0 | 26   | 39  | 0.00 | 0.00 | 0.00 | NA    | 0.92 |
| V179F        | <i>Q242L</i> | 0 | 26   | 39  | 0.00 | 0.00 | 0.00 | NA    | 0.92 |
| E138Q        | <i>V241M</i> | 0 | 77   | 13  | 0.00 | 0.00 | 0.00 | NA    | 0.93 |
| G190A        | <i>K223T</i> | 9 | 1895 | 53  | 0.00 | 0.00 | 0.00 | -0.09 | 0.93 |
| K101N        | <i>F227Y</i> | 0 | 45   | 22  | 0.00 | 0.00 | 0.00 | NA    | 0.93 |
| V179T        | <i>V241M</i> | 0 | 76   | 13  | 0.00 | 0.00 | 0.00 | NA    | 0.93 |
| Y188C        | <i>Q242L</i> | 0 | 26   | 38  | 0.00 | 0.00 | 0.00 | NA    | 0.93 |
| <i>I94L</i>  | K103H        | 0 | 65   | 15  | 0.00 | 0.00 | 0.00 | NA    | 0.93 |
| K103H        | <i>K223T</i> | 0 | 15   | 65  | 0.00 | 0.00 | 0.00 | NA    | 0.93 |
| G190S        | <i>Q242L</i> | 1 | 361  | 38  | 0.00 | 0.00 | 0.00 | -0.09 | 0.93 |
| G190C        | <i>K238N</i> | 0 | 19   | 50  | 0.00 | 0.00 | 0.00 | NA    | 0.93 |
| A98G         | <i>K223T</i> | 5 | 964  | 58  | 0.00 | 0.00 | 0.00 | 0.09  | 0.93 |
| <i>S105T</i> | V179D        | 1 | 23   | 603 | 0.00 | 0.00 | 0.00 | -0.09 | 0.93 |
| G190Q        | <i>L234I</i> | 0 | 35   | 27  | 0.00 | 0.00 | 0.00 | NA    | 0.93 |
| <i>I178F</i> | G190Q        | 0 | 27   | 35  | 0.00 | 0.00 | 0.00 | NA    | 0.93 |
| G190Q        | P236L        | 0 | 35   | 27  | 0.00 | 0.00 | 0.00 | NA    | 0.93 |
| <i>S105T</i> | Y188H        | 0 | 24   | 39  | 0.00 | 0.00 | 0.00 | NA    | 0.93 |
| <i>S105T</i> | <i>Q242L</i> | 0 | 24   | 39  | 0.00 | 0.00 | 0.00 | NA    | 0.93 |
| K103N        | <i>V241M</i> | 6 | 5588 | 7   | 0.00 | 0.00 | 0.00 | 0.09  | 0.93 |
| <i>K102N</i> | G190C        | 0 | 49   | 19  | 0.00 | 0.00 | 0.00 | NA    | 0.93 |
| G190C        | Y318F        | 0 | 19   | 49  | 0.00 | 0.00 | 0.00 | NA    | 0.93 |
| K103T        | E138Q        | 0 | 12   | 77  | 0.00 | 0.00 | 0.00 | NA    | 0.93 |
| K103T        | V179T        | 0 | 12   | 76  | 0.00 | 0.00 | 0.00 | NA    | 0.93 |
| V179F        | G190Q        | 0 | 26   | 35  | 0.00 | 0.00 | 0.00 | NA    | 0.93 |
| Y188C        | G190Q        | 0 | 26   | 35  | 0.00 | 0.00 | 0.00 | NA    | 0.93 |
| Y188H        | <i>Y232H</i> | 0 | 39   | 23  | 0.00 | 0.00 | 0.00 | NA    | 0.93 |
| Y181V        | <i>V241M</i> | 0 | 69   | 13  | 0.00 | 0.00 | 0.00 | NA    | 0.93 |
| <i>Y232H</i> | <i>Q242L</i> | 0 | 23   | 39  | 0.00 | 0.00 | 0.00 | NA    | 0.93 |
| G190E        | <i>H221C</i> | 0 | 54   | 16  | 0.00 | 0.00 | 0.00 | NA    | 0.94 |
| Y188H        | <i>F227Y</i> | 0 | 39   | 22  | 0.00 | 0.00 | 0.00 | NA    | 0.94 |
| K101N        | G190C        | 0 | 45   | 19  | 0.00 | 0.00 | 0.00 | NA    | 0.94 |
| <i>K223T</i> | <i>V241M</i> | 0 | 65   | 13  | 0.00 | 0.00 | 0.00 | NA    | 0.94 |
| <i>I94L</i>  | <i>V241M</i> | 0 | 65   | 13  | 0.00 | 0.00 | 0.00 | NA    | 0.94 |
| <i>S105T</i> | G190Q        | 0 | 24   | 35  | 0.00 | 0.00 | 0.00 | NA    | 0.94 |
| K103T        | Y181V        | 0 | 12   | 69  | 0.00 | 0.00 | 0.00 | NA    | 0.94 |
| K101E        | K103H        | 1 | 827  | 13  | 0.00 | 0.00 | 0.00 | 0.08  | 0.94 |
| K103H        | G190E        | 0 | 15   | 54  | 0.00 | 0.00 | 0.00 | NA    | 0.94 |
| G190Q        | <i>Y232H</i> | 0 | 35   | 23  | 0.00 | 0.00 | 0.00 | NA    | 0.94 |
| <i>H221C</i> | <i>K238N</i> | 0 | 16   | 50  | 0.00 | 0.00 | 0.00 | NA    | 0.94 |

|              |              |    |      |     |      |      |      |       |      |
|--------------|--------------|----|------|-----|------|------|------|-------|------|
| <i>K102N</i> | <i>H221C</i> | 0  | 49   | 16  | 0.00 | 0.00 | 0.00 | NA    | 0.94 |
| <i>H221C</i> | Y318F        | 0  | 16   | 49  | 0.00 | 0.00 | 0.00 | NA    | 0.94 |
| <i>I94L</i>  | K103T        | 0  | 65   | 12  | 0.00 | 0.00 | 0.00 | NA    | 0.94 |
| G190Q        | <i>F227Y</i> | 0  | 35   | 22  | 0.00 | 0.00 | 0.00 | NA    | 0.94 |
| K103H        | <i>K238N</i> | 0  | 15   | 50  | 0.00 | 0.00 | 0.00 | NA    | 0.94 |
| K103N        | <i>Y232H</i> | 10 | 5582 | 12  | 0.00 | 0.00 | 0.00 | 0.07  | 0.94 |
| Y188H        | G190C        | 0  | 39   | 19  | 0.00 | 0.00 | 0.00 | NA    | 0.94 |
| G190C        | <i>Q242L</i> | 0  | 19   | 39  | 0.00 | 0.00 | 0.00 | NA    | 0.94 |
| <i>K102N</i> | K103H        | 0  | 49   | 15  | 0.00 | 0.00 | 0.00 | NA    | 0.94 |
| K103H        | Y318F        | 0  | 15   | 49  | 0.00 | 0.00 | 0.00 | NA    | 0.95 |
| <i>I178F</i> | <i>L234I</i> | 0  | 27   | 27  | 0.00 | 0.00 | 0.00 | NA    | 0.95 |
| <i>L234I</i> | P236L        | 0  | 27   | 27  | 0.00 | 0.00 | 0.00 | NA    | 0.95 |
| <i>I178F</i> | P236L        | 0  | 27   | 27  | 0.00 | 0.00 | 0.00 | NA    | 0.95 |
| K101N        | <i>H221C</i> | 0  | 45   | 16  | 0.00 | 0.00 | 0.00 | NA    | 0.95 |
| K101E        | <i>T139R</i> | 6  | 823  | 89  | 0.01 | 0.01 | 0.00 | -0.07 | 0.95 |
| V179F        | <i>L234I</i> | 0  | 26   | 27  | 0.00 | 0.00 | 0.00 | NA    | 0.95 |
| Y188C        | <i>L234I</i> | 0  | 26   | 27  | 0.00 | 0.00 | 0.00 | NA    | 0.95 |
| <i>I178F</i> | V179F        | 0  | 27   | 26  | 0.00 | 0.00 | 0.00 | NA    | 0.95 |
| <i>I178F</i> | Y188C        | 0  | 27   | 26  | 0.00 | 0.00 | 0.00 | NA    | 0.95 |
| V179F        | P236L        | 0  | 26   | 27  | 0.00 | 0.00 | 0.00 | NA    | 0.95 |
| Y188C        | P236L        | 0  | 26   | 27  | 0.00 | 0.00 | 0.00 | NA    | 0.95 |
| G190E        | <i>V241M</i> | 0  | 54   | 13  | 0.00 | 0.00 | 0.00 | NA    | 0.95 |
| E138Q        | P225H        | 2  | 75   | 336 | 0.00 | 0.01 | 0.00 | -0.06 | 0.95 |
| V108I        | V179F        | 2  | 1040 | 23  | 0.00 | 0.00 | 0.00 | -0.06 | 0.95 |
| V179F        | Y188C        | 0  | 26   | 26  | 0.00 | 0.00 | 0.00 | NA    | 0.95 |
| K103T        | G190E        | 0  | 12   | 54  | 0.00 | 0.00 | 0.00 | NA    | 0.95 |
| <i>S105T</i> | <i>L234I</i> | 0  | 24   | 27  | 0.00 | 0.00 | 0.00 | NA    | 0.95 |
| L100I        | H221Y        | 34 | 567  | 682 | 0.03 | 0.03 | 0.00 | -0.06 | 0.95 |
| <i>S105T</i> | <i>I178F</i> | 0  | 24   | 27  | 0.00 | 0.00 | 0.00 | NA    | 0.95 |
| <i>S105T</i> | P236L        | 0  | 24   | 27  | 0.00 | 0.00 | 0.00 | NA    | 0.95 |
| <i>K102N</i> | <i>V241M</i> | 0  | 49   | 13  | 0.00 | 0.00 | 0.00 | NA    | 0.95 |
| <i>V241M</i> | Y318F        | 0  | 13   | 49  | 0.00 | 0.00 | 0.00 | NA    | 0.95 |
| K103S        | V106A        | 3  | 198  | 181 | 0.01 | 0.01 | 0.00 | 0.06  | 0.95 |
| <i>S105T</i> | V179F        | 0  | 24   | 26  | 0.00 | 0.00 | 0.00 | NA    | 0.95 |
| Y188H        | <i>H221C</i> | 0  | 39   | 16  | 0.00 | 0.00 | 0.00 | NA    | 0.95 |
| <i>H221C</i> | <i>Q242L</i> | 0  | 16   | 39  | 0.00 | 0.00 | 0.00 | NA    | 0.95 |
| <i>I178F</i> | <i>Y232H</i> | 0  | 27   | 23  | 0.00 | 0.00 | 0.00 | NA    | 0.95 |
| <i>Y232H</i> | <i>L234I</i> | 0  | 23   | 27  | 0.00 | 0.00 | 0.00 | NA    | 0.95 |
| <i>Y232H</i> | P236L        | 0  | 23   | 27  | 0.00 | 0.00 | 0.00 | NA    | 0.95 |
| V179F        | <i>Y232H</i> | 0  | 26   | 23  | 0.00 | 0.00 | 0.00 | NA    | 0.96 |
| Y188C        | <i>Y232H</i> | 0  | 26   | 23  | 0.00 | 0.00 | 0.00 | NA    | 0.96 |
| <i>I178F</i> | <i>F227Y</i> | 0  | 27   | 22  | 0.00 | 0.00 | 0.00 | NA    | 0.96 |

|       |       |    |     |      |      |      |      |       |      |
|-------|-------|----|-----|------|------|------|------|-------|------|
| F227Y | P236L | 0  | 22  | 27   | 0.00 | 0.00 | 0.00 | NA    | 0.96 |
| K102N | K103T | 0  | 49  | 12   | 0.00 | 0.00 | 0.00 | NA    | 0.96 |
| K103T | Y318F | 0  | 12  | 49   | 0.00 | 0.00 | 0.00 | NA    | 0.96 |
| K101N | V241M | 0  | 45  | 13   | 0.00 | 0.00 | 0.00 | NA    | 0.96 |
| K103H | Y188H | 0  | 15  | 39   | 0.00 | 0.00 | 0.00 | NA    | 0.96 |
| K103H | Q242L | 0  | 15  | 39   | 0.00 | 0.00 | 0.00 | NA    | 0.96 |
| V179F | F227Y | 0  | 26  | 22   | 0.00 | 0.00 | 0.00 | NA    | 0.96 |
| Y188C | F227Y | 0  | 26  | 22   | 0.00 | 0.00 | 0.00 | NA    | 0.96 |
| G190Q | H221C | 0  | 35  | 16   | 0.00 | 0.00 | 0.00 | NA    | 0.96 |
| S105T | Y232H | 0  | 24  | 23   | 0.00 | 0.00 | 0.00 | NA    | 0.96 |
| K101N | K103T | 0  | 45  | 12   | 0.00 | 0.00 | 0.00 | NA    | 0.96 |
| S105T | F227Y | 0  | 24  | 22   | 0.00 | 0.00 | 0.00 | NA    | 0.96 |
| K103H | G190Q | 0  | 15  | 35   | 0.00 | 0.00 | 0.00 | NA    | 0.96 |
| I178F | G190C | 0  | 27  | 19   | 0.00 | 0.00 | 0.00 | NA    | 0.96 |
| G190C | L234I | 0  | 19  | 27   | 0.00 | 0.00 | 0.00 | NA    | 0.96 |
| G190C | P236L | 0  | 19  | 27   | 0.00 | 0.00 | 0.00 | NA    | 0.96 |
| Y188H | V241M | 0  | 39  | 13   | 0.00 | 0.00 | 0.00 | NA    | 0.96 |
| V241M | Q242L | 0  | 13  | 39   | 0.00 | 0.00 | 0.00 | NA    | 0.96 |
| F227Y | Y232H | 0  | 22  | 23   | 0.00 | 0.00 | 0.00 | NA    | 0.96 |
| V179F | G190C | 0  | 26  | 19   | 0.00 | 0.00 | 0.00 | NA    | 0.96 |
| Y188C | G190C | 0  | 26  | 19   | 0.00 | 0.00 | 0.00 | NA    | 0.96 |
| T139R | G190A | 14 | 80  | 1887 | 0.01 | 0.01 | 0.00 | -0.05 | 0.96 |
| V179T | D237E | 1  | 75  | 160  | 0.00 | 0.00 | 0.00 | 0.04  | 0.96 |
| K103T | Y188H | 0  | 12  | 39   | 0.00 | 0.00 | 0.00 | NA    | 0.96 |
| K103T | Q242L | 0  | 12  | 39   | 0.00 | 0.00 | 0.00 | NA    | 0.96 |
| S105T | G190C | 0  | 24  | 19   | 0.00 | 0.00 | 0.00 | NA    | 0.97 |
| G190Q | V241M | 0  | 35  | 13   | 0.00 | 0.00 | 0.00 | NA    | 0.97 |
| G190C | Y232H | 0  | 19  | 23   | 0.00 | 0.00 | 0.00 | NA    | 0.97 |
| I178F | H221C | 0  | 27  | 16   | 0.00 | 0.00 | 0.00 | NA    | 0.97 |
| H221C | L234I | 0  | 16  | 27   | 0.00 | 0.00 | 0.00 | NA    | 0.97 |
| H221C | P236L | 0  | 16  | 27   | 0.00 | 0.00 | 0.00 | NA    | 0.97 |
| K103T | G190Q | 0  | 12  | 35   | 0.00 | 0.00 | 0.00 | NA    | 0.97 |
| G190C | F227Y | 0  | 19  | 22   | 0.00 | 0.00 | 0.00 | NA    | 0.97 |
| V179F | H221C | 0  | 26  | 16   | 0.00 | 0.00 | 0.00 | NA    | 0.97 |
| Y188C | H221C | 0  | 26  | 16   | 0.00 | 0.00 | 0.00 | NA    | 0.97 |
| K103H | I178F | 0  | 15  | 27   | 0.00 | 0.00 | 0.00 | NA    | 0.97 |
| K103H | L234I | 0  | 15  | 27   | 0.00 | 0.00 | 0.00 | NA    | 0.97 |
| K103H | P236L | 0  | 15  | 27   | 0.00 | 0.00 | 0.00 | NA    | 0.97 |
| K103H | V179F | 0  | 15  | 26   | 0.00 | 0.00 | 0.00 | NA    | 0.97 |
| K103H | Y188C | 0  | 15  | 26   | 0.00 | 0.00 | 0.00 | NA    | 0.97 |
| K103S | K223T | 1  | 199 | 64   | 0.00 | 0.00 | 0.00 | 0.04  | 0.97 |
| H221C | Y232H | 0  | 16  | 23   | 0.00 | 0.00 | 0.00 | NA    | 0.97 |

|              |              |    |      |      |      |      |      |       |      |
|--------------|--------------|----|------|------|------|------|------|-------|------|
| K103H        | <i>S105T</i> | 0  | 15   | 24   | 0.00 | 0.00 | 0.00 | NA    | 0.97 |
| <i>H221C</i> | <i>F227Y</i> | 0  | 16   | 22   | 0.00 | 0.00 | 0.00 | NA    | 0.97 |
| <i>L234I</i> | <i>V241M</i> | 0  | 27   | 13   | 0.00 | 0.00 | 0.00 | NA    | 0.97 |
| <i>I178F</i> | <i>V241M</i> | 0  | 27   | 13   | 0.00 | 0.00 | 0.00 | NA    | 0.97 |
| P236L        | <i>V241M</i> | 0  | 27   | 13   | 0.00 | 0.00 | 0.00 | NA    | 0.97 |
| K103H        | <i>Y232H</i> | 0  | 15   | 23   | 0.00 | 0.00 | 0.00 | NA    | 0.97 |
| V179F        | <i>V241M</i> | 0  | 26   | 13   | 0.00 | 0.00 | 0.00 | NA    | 0.97 |
| Y188C        | <i>V241M</i> | 0  | 26   | 13   | 0.00 | 0.00 | 0.00 | NA    | 0.97 |
| K103H        | <i>F227Y</i> | 0  | 15   | 22   | 0.00 | 0.00 | 0.00 | NA    | 0.98 |
| K103T        | <i>I178F</i> | 0  | 12   | 27   | 0.00 | 0.00 | 0.00 | NA    | 0.98 |
| K103T        | <i>L234I</i> | 0  | 12   | 27   | 0.00 | 0.00 | 0.00 | NA    | 0.98 |
| K103T        | P236L        | 0  | 12   | 27   | 0.00 | 0.00 | 0.00 | NA    | 0.98 |
| K103T        | V179F        | 0  | 12   | 26   | 0.00 | 0.00 | 0.00 | NA    | 0.98 |
| K103T        | Y188C        | 0  | 12   | 26   | 0.00 | 0.00 | 0.00 | NA    | 0.98 |
| <i>S105T</i> | <i>V241M</i> | 0  | 24   | 13   | 0.00 | 0.00 | 0.00 | NA    | 0.98 |
| G190C        | <i>H221C</i> | 0  | 19   | 16   | 0.00 | 0.00 | 0.00 | NA    | 0.98 |
| <i>Y232H</i> | <i>V241M</i> | 0  | 23   | 13   | 0.00 | 0.00 | 0.00 | NA    | 0.98 |
| K103T        | <i>S105T</i> | 0  | 12   | 24   | 0.00 | 0.00 | 0.00 | NA    | 0.98 |
| <i>F227Y</i> | <i>V241M</i> | 0  | 22   | 13   | 0.00 | 0.00 | 0.00 | NA    | 0.98 |
| K103H        | G190C        | 0  | 15   | 19   | 0.00 | 0.00 | 0.00 | NA    | 0.98 |
| <i>T139R</i> | Y181I        | 1  | 97   | 133  | 0.00 | 0.00 | 0.00 | -0.03 | 0.98 |
| K103T        | <i>Y232H</i> | 0  | 12   | 23   | 0.00 | 0.00 | 0.00 | NA    | 0.98 |
| K103T        | <i>F227Y</i> | 0  | 12   | 22   | 0.00 | 0.00 | 0.00 | NA    | 0.98 |
| G190C        | <i>V241M</i> | 0  | 19   | 13   | 0.00 | 0.00 | 0.00 | NA    | 0.98 |
| K103H        | <i>H221C</i> | 0  | 15   | 16   | 0.00 | 0.00 | 0.00 | NA    | 0.98 |
| K103T        | G190C        | 0  | 12   | 19   | 0.00 | 0.00 | 0.00 | NA    | 0.98 |
| K103N        | V179F        | 11 | 5579 | 14   | 0.00 | 0.00 | 0.00 | -0.02 | 0.98 |
| <i>H221C</i> | <i>V241M</i> | 0  | 16   | 13   | 0.00 | 0.00 | 0.00 | NA    | 0.98 |
| K103H        | <i>V241M</i> | 0  | 15   | 13   | 0.00 | 0.00 | 0.00 | NA    | 0.99 |
| K103T        | <i>H221C</i> | 0  | 12   | 16   | 0.00 | 0.00 | 0.00 | NA    | 0.99 |
| <i>S105T</i> | Y181C        | 5  | 19   | 2682 | 0.00 | 0.00 | 0.00 | -0.02 | 0.99 |
| G190Q        | H221Y        | 2  | 33   | 717  | 0.00 | 0.00 | 0.00 | 0.02  | 0.99 |
| K103T        | <i>V241M</i> | 0  | 12   | 13   | 0.00 | 0.00 | 0.00 | NA    | 0.99 |
| Y181C        | <i>K223T</i> | 13 | 2664 | 49   | 0.00 | 0.00 | 0.00 | -0.01 | 0.99 |

Bolded mutation pairs have significant positive covariances following correction for multiple comparisons at  $p < 0.05$ .

Italicized mutations were recently characterized as nonpolymorphic NNRTI-selected mutations (Shahriar 2009): I94L, K101H, K102N, S105T, T139R, I178F, H221C, K223T, F227Y, Y232H, L234I, D237E, K238N, V241M, and Q242L.

\* Occurrences in the full dataset of 13,039 isolates containing at least 1 NNRTI-associated mutation; only 1 isolate per patient was included in the analysis and sequences with mixtures at a given position were excluded from comparisons at that position. XY: isolates containing both mutations; X only: isolates containing mutation X but not mutation Y; Y only: isolates containing mutation Y but not mutation X.

† J: Jaccard similarity coefficients;  $J_{\text{RAND}}$ : expected value of the Jaccard similarity coefficient assuming Mutation X and Mutation Y occur independently based on a permutation procedure described in Methods;  $J_{\text{SE}}$ : the standard error of J; Z:  $(J - J_{\text{RAND}}) / J_{\text{SE}}$ . A negative Z score indicates a negative correlation.

Z scores marked NA indicate zero sequences with both mutations; the p-value for these comparisons was calculated using Fisher's exact one-tailed test.

**Table S2.** Covariation between pairs of NNRTI-selected mutations, EFV-experienced subset

| Mut X        | Mut Y        | Occurrences* |            |            | Association† |                   |                 |             |               |
|--------------|--------------|--------------|------------|------------|--------------|-------------------|-----------------|-------------|---------------|
|              |              | XY           | X only     | Y only     | J            | J <sub>RAND</sub> | J <sub>SE</sub> | Z           | p             |
| K103N        | G190S        | 10           | 722        | 60         | 0.01         | 0.07              | 0.00            | -13.23      | 6.3E-40       |
| K101E        | K103N        | 9            | 51         | 716        | 0.01         | 0.06              | 0.00            | -11.77      | 5.7E-32       |
| K103N        | V106I        | 3            | 729        | 26         | 0            | 0.03              | 0.00            | -10.42      | 2.0E-25       |
| K103N        | Y188L        | 21           | 707        | 65         | 0.03         | 0.08              | 0.01            | -9.41       | 4.9E-21       |
| L100I        | G190A        | 1            | 113        | 75         | 0.01         | 0.05              | 0.01            | -7.58       | 3.6E-14       |
| K103N        | V106M        | 20           | 709        | 50         | 0.03         | 0.07              | 0.01            | -7.02       | 2.2E-12       |
| L100I        | V106M        | 1            | 113        | 71         | 0.01         | 0.04              | 0.01            | -6.94       | 4.0E-12       |
| <b>K101E</b> | <b>G190S</b> | <b>27</b>    | <b>33</b>  | <b>41</b>  | <b>0.27</b>  | <b>0.03</b>       | <b>0.04</b>     | <b>5.34</b> | <b>9.3E-8</b> |
| V106M        | Y188L        | 1            | 71         | 88         | 0.01         | 0.04              | 0.01            | -5.03       | 4.9E-7        |
| V106M        | P225H        | 1            | 71         | 80         | 0.01         | 0.04              | 0.01            | -4.76       | 1.9E-6        |
| <b>V106M</b> | <b>V179D</b> | <b>19</b>    | <b>49</b>  | <b>28</b>  | <b>0.2</b>   | <b>0.03</b>       | <b>0.04</b>     | <b>4.19</b> | <b>2.8E-5</b> |
| V108I        | P225H        | 1            | 64         | 78         | 0.01         | 0.04              | 0.01            | -4.06       | 4.8E-5        |
| V106M        | G190S        | 1            | 71         | 71         | 0.01         | 0.03              | 0.01            | -3.80       | 1.4E-4        |
| L100I        | Y188L        | 3            | 110        | 86         | 0.02         | 0.05              | 0.01            | -3.79       | 1.5E-4        |
| <b>V106I</b> | <b>Y188L</b> | <b>15</b>    | <b>16</b>  | <b>70</b>  | <b>0.15</b>  | <b>0.02</b>       | <b>0.04</b>     | <b>3.57</b> | <b>3.5E-4</b> |
| <b>L100I</b> | <b>K103N</b> | <b>104</b>   | <b>6</b>   | <b>594</b> | <b>0.15</b>  | <b>0.10</b>       | <b>0.01</b>     | <b>3.29</b> | <b>1.0E-3</b> |
| L100I        | K101E        | 2            | 112        | 57         | 0.01         | 0.04              | 0.01            | -3.21       | 1.3E-3        |
| <b>V179D</b> | <b>Y188L</b> | <b>15</b>    | <b>32</b>  | <b>72</b>  | <b>0.13</b>  | <b>0.03</b>       | <b>0.03</b>     | <b>3.17</b> | <b>1.5E-3</b> |
| <b>K103N</b> | <b>P225H</b> | <b>79</b>    | <b>617</b> | <b>1</b>   | <b>0.11</b>  | <b>0.08</b>       | <b>0.01</b>     | <b>3.05</b> | <b>2.3E-3</b> |
| <b>Y181C</b> | <b>G190A</b> | <b>14</b>    | <b>42</b>  | <b>60</b>  | <b>0.12</b>  | <b>0.03</b>       | <b>0.03</b>     | <b>2.95</b> | <b>3.1E-3</b> |
| <b>Y181C</b> | <b>H221Y</b> | <b>11</b>    | <b>46</b>  | <b>27</b>  | <b>0.13</b>  | <b>0.02</b>       | <b>0.04</b>     | <b>2.94</b> | <b>3.3E-3</b> |
| K103N        | Y181C        | 27           | 701        | 31         | 0.04         | 0.06              | 0.01            | -2.89       | 3.8E-3        |
| <b>V108I</b> | <b>H221Y</b> | <b>11</b>    | <b>54</b>  | <b>25</b>  | <b>0.12</b>  | <b>0.02</b>       | <b>0.03</b>     | <b>2.85</b> | <b>4.4E-3</b> |
| K101E        | V108I        | 1            | 56         | 67         | 0.01         | 0.03              | 0.01            | -2.82       | 0.00          |
| <b>K101E</b> | <b>G190A</b> | <b>13</b>    | <b>46</b>  | <b>60</b>  | <b>0.11</b>  | <b>0.03</b>       | <b>0.03</b>     | <b>2.72</b> | <b>0.01</b>   |
| <b>Y181C</b> | <b>G190S</b> | <b>12</b>    | <b>46</b>  | <b>56</b>  | <b>0.11</b>  | <b>0.03</b>       | <b>0.03</b>     | <b>2.62</b> | <b>0.01</b>   |
| L100I        | V108I        | 3            | 109        | 63         | 0.02         | 0.04              | 0.01            | -2.55       | 0.01          |
| K103N        | G190A        | 38           | 676        | 37         | 0.05         | 0.07              | 0.01            | -2.48       | 0.01          |
| <b>K103N</b> | <b>V108I</b> | <b>64</b>    | <b>629</b> | <b>3</b>   | <b>0.09</b>  | <b>0.07</b>       | <b>0.01</b>     | <b>2.43</b> | <b>0.02</b>   |
| <b>A98G</b>  | <b>Y181C</b> | <b>9</b>     | <b>34</b>  | <b>48</b>  | <b>0.1</b>   | <b>0.02</b>       | <b>0.03</b>     | <b>2.41</b> | <b>0.02</b>   |
| <b>K101E</b> | <b>Y181C</b> | <b>10</b>    | <b>47</b>  | <b>46</b>  | <b>0.1</b>   | <b>0.03</b>       | <b>0.03</b>     | <b>2.39</b> | <b>0.02</b>   |
| V108I        | V179D        | 1            | 67         | 46         | 0.01         | 0.03              | 0.01            | -2.16       | 0.03          |
| V108I        | G190A        | 2            | 66         | 72         | 0.01         | 0.04              | 0.01            | -2.07       | 0.04          |
| K101H        | K103N        | 2            | 5          | 731        | 0            | 0.01              | 0.00            | -2.07       | 0.04          |
| V90I         | V106M        | 1            | 45         | 70         | 0.01         | 0.03              | 0.01            | -2.07       | 0.04          |



|       |       |    |     |     |      |      |      |       |      |
|-------|-------|----|-----|-----|------|------|------|-------|------|
| L100I | K238T | 1  | 111 | 28  | 0.01 | 0.02 | 0.01 | -2.06 | 0.04 |
| V106M | G190A | 11 | 59  | 65  | 0.08 | 0.04 | 0.02 | 1.96  | 0.05 |
| V106M | E138A | 6  | 66  | 16  | 0.07 | 0.02 | 0.03 | 1.95  | 0.05 |
| K103N | F227L | 3  | 729 | 6   | 0    | 0.01 | 0.00 | -1.94 | 0.05 |
| Y181C | Y188L | 2  | 56  | 87  | 0.01 | 0.03 | 0.01 | -1.93 | 0.05 |
| V106M | Y188C | 4  | 65  | 1   | 0.06 | 0.00 | 0.03 | 1.88  | 0.06 |
| A98G  | G190S | 1  | 42  | 71  | 0.01 | 0.03 | 0.01 | -1.87 | 0.06 |
| K101E | V106I | 6  | 53  | 24  | 0.07 | 0.02 | 0.03 | 1.87  | 0.06 |
| K101E | E138A | 5  | 55  | 15  | 0.07 | 0.01 | 0.03 | 1.82  | 0.07 |
| Y181C | P225H | 2  | 56  | 79  | 0.01 | 0.03 | 0.01 | -1.81 | 0.07 |
| K103N | E138A | 10 | 722 | 12  | 0.01 | 0.02 | 0.00 | -1.76 | 0.08 |
| A98G  | V108I | 7  | 35  | 60  | 0.07 | 0.03 | 0.03 | 1.72  | 0.08 |
| K101E | V106M | 8  | 51  | 62  | 0.07 | 0.03 | 0.02 | 1.58  | 0.11 |
| V106M | H221Y | 1  | 69  | 38  | 0.01 | 0.02 | 0.01 | -1.58 | 0.11 |
| V179D | F227L | 3  | 44  | 6   | 0.06 | 0.01 | 0.03 | 1.54  | 0.12 |
| K101H | G190A | 3  | 3   | 72  | 0.04 | 0.01 | 0.02 | 1.51  | 0.13 |
| V90I  | K103N | 24 | 20  | 689 | 0.03 | 0.04 | 0.01 | -1.51 | 0.13 |
| K101N | G190A | 3  | 3   | 72  | 0.04 | 0.01 | 0.02 | 1.51  | 0.13 |
| K101P | G190A | 5  | 21  | 71  | 0.05 | 0.02 | 0.02 | 1.49  | 0.14 |
| V90I  | G190A | 7  | 39  | 68  | 0.06 | 0.03 | 0.02 | 1.48  | 0.14 |
| V179D | M230L | 4  | 43  | 22  | 0.06 | 0.02 | 0.03 | 1.48  | 0.14 |
| V106M | F227L | 3  | 60  | 6   | 0.04 | 0.01 | 0.02 | 1.44  | 0.15 |
| V108I | Y181C | 7  | 60  | 48  | 0.06 | 0.03 | 0.02 | 1.41  | 0.16 |
| V106I | V179D | 4  | 27  | 42  | 0.05 | 0.02 | 0.03 | 1.40  | 0.16 |
| V106A | F227L | 2  | 3   | 7   | 0.17 | 0.00 | 0.12 | 1.40  | 0.16 |
| Y188L | K238T | 1  | 87  | 28  | 0.01 | 0.02 | 0.01 | -1.39 | 0.16 |
| V106I | K223T | 2  | 29  | 2   | 0.06 | 0.00 | 0.04 | 1.35  | 0.18 |
| V90I  | I94L  | 2  | 44  | 1   | 0.04 | 0.00 | 0.03 | 1.33  | 0.18 |
| Y181I | G190A | 2  | 0   | 74  | 0.03 | 0.00 | 0.02 | 1.32  | 0.19 |
| K102N | G190A | 2  | 0   | 74  | 0.03 | 0.00 | 0.02 | 1.31  | 0.19 |
| I94L  | G190A | 2  | 1   | 74  | 0.03 | 0.00 | 0.02 | 1.28  | 0.20 |
| K101E | E138Q | 2  | 58  | 2   | 0.03 | 0.00 | 0.02 | 1.27  | 0.20 |
| V106A | V179D | 2  | 3   | 45  | 0.04 | 0.00 | 0.03 | 1.27  | 0.20 |
| E138Q | G190S | 2  | 2   | 69  | 0.03 | 0.00 | 0.02 | 1.25  | 0.21 |
| E138A | G190E | 2  | 20  | 13  | 0.06 | 0.01 | 0.04 | 1.22  | 0.22 |
| K101N | Y181C | 2  | 4   | 55  | 0.03 | 0.01 | 0.02 | 1.20  | 0.23 |
| K101H | Y181C | 2  | 4   | 55  | 0.03 | 0.01 | 0.02 | 1.20  | 0.23 |
| Y188L | G190A | 4  | 85  | 72  | 0.02 | 0.04 | 0.01 | -1.19 | 0.23 |
| L100I | P225H | 6  | 108 | 75  | 0.03 | 0.05 | 0.01 | -1.19 | 0.23 |
| H221Y | K238T | 3  | 36  | 25  | 0.05 | 0.02 | 0.03 | 1.17  | 0.24 |
| V108I | K238T | 4  | 64  | 23  | 0.04 | 0.02 | 0.02 | 1.17  | 0.24 |
| V90I  | L100I | 3  | 42  | 109 | 0.02 | 0.03 | 0.01 | -1.15 | 0.25 |

|       |       |    |     |    |      |      |      |       |      |
|-------|-------|----|-----|----|------|------|------|-------|------|
| E138A | Y188L | 4  | 18  | 85 | 0.04 | 0.02 | 0.02 | 1.14  | 0.26 |
| K103N | K238T | 25 | 684 | 3  | 0.04 | 0.03 | 0.01 | 1.13  | 0.26 |
| K101H | G190S | 2  | 5   | 69 | 0.03 | 0.01 | 0.02 | 1.11  | 0.27 |
| Y188L | Y232H | 2  | 87  | 4  | 0.02 | 0.01 | 0.02 | 1.07  | 0.28 |
| V90I  | G190S | 5  | 41  | 64 | 0.05 | 0.03 | 0.02 | 0.99  | 0.32 |
| V106I | E138A | 2  | 29  | 20 | 0.04 | 0.01 | 0.03 | 0.98  | 0.33 |
| G190S | K238T | 1  | 71  | 28 | 0.01 | 0.02 | 0.01 | -0.97 | 0.33 |
| E138A | G190S | 3  | 18  | 69 | 0.03 | 0.01 | 0.02 | 0.96  | 0.34 |
| V106M | K238T | 1  | 71  | 28 | 0.01 | 0.02 | 0.01 | -0.95 | 0.34 |
| I94L  | G190E | 1  | 2   | 13 | 0.06 | 0.00 | 0.06 | 0.93  | 0.35 |
| K103S | D237E | 1  | 1   | 7  | 0.11 | 0.00 | 0.12 | 0.93  | 0.35 |
| Y181I | D237E | 1  | 1   | 7  | 0.11 | 0.00 | 0.12 | 0.93  | 0.35 |
| K101H | Q242L | 1  | 6   | 1  | 0.13 | 0.00 | 0.13 | 0.92  | 0.36 |
| K101E | M230L | 3  | 56  | 23 | 0.04 | 0.02 | 0.02 | 0.92  | 0.36 |
| K101E | H221Y | 4  | 56  | 35 | 0.04 | 0.02 | 0.02 | 0.91  | 0.36 |
| A98G  | Y318F | 1  | 43  | 1  | 0.02 | 0.00 | 0.02 | 0.91  | 0.36 |
| A98G  | V179D | 1  | 43  | 46 | 0.01 | 0.02 | 0.01 | -0.91 | 0.36 |
| K101P | E138Q | 1  | 25  | 3  | 0.03 | 0.00 | 0.04 | 0.91  | 0.36 |
| Y181C | K238T | 3  | 54  | 25 | 0.04 | 0.02 | 0.02 | 0.90  | 0.37 |
| Y188L | H221Y | 2  | 85  | 37 | 0.02 | 0.03 | 0.01 | -0.89 | 0.37 |
| A98G  | G190A | 5  | 38  | 71 | 0.04 | 0.03 | 0.02 | 0.89  | 0.37 |
| Y181C | Q242L | 1  | 56  | 1  | 0.02 | 0.00 | 0.02 | 0.88  | 0.38 |
| K223T | K238T | 1  | 3   | 28 | 0.03 | 0.00 | 0.03 | 0.88  | 0.38 |
| V108I | T139R | 1  | 67  | 1  | 0.01 | 0.00 | 0.01 | 0.88  | 0.38 |
| A98G  | G190C | 1  | 42  | 2  | 0.02 | 0.00 | 0.02 | 0.87  | 0.38 |
| A98G  | K223T | 1  | 43  | 2  | 0.02 | 0.00 | 0.02 | 0.87  | 0.38 |
| V108I | Q242L | 1  | 67  | 1  | 0.01 | 0.00 | 0.01 | 0.87  | 0.39 |
| A98G  | P225H | 5  | 39  | 72 | 0.04 | 0.03 | 0.02 | 0.86  | 0.39 |
| G190A | Q242L | 1  | 74  | 1  | 0.01 | 0.00 | 0.01 | 0.86  | 0.39 |
| V106M | Q242L | 1  | 71  | 1  | 0.01 | 0.00 | 0.01 | 0.86  | 0.39 |
| K103S | V106M | 1  | 1   | 71 | 0.01 | 0.00 | 0.01 | 0.86  | 0.39 |
| V179D | G190A | 5  | 41  | 69 | 0.04 | 0.03 | 0.02 | 0.85  | 0.39 |
| V90I  | Y181C | 4  | 41  | 53 | 0.04 | 0.02 | 0.02 | 0.85  | 0.40 |
| P225H | Y318F | 1  | 80  | 1  | 0.01 | 0.00 | 0.01 | 0.85  | 0.40 |
| Y188L | Y318F | 1  | 88  | 1  | 0.01 | 0.00 | 0.01 | 0.85  | 0.40 |
| V106I | Y188C | 1  | 30  | 4  | 0.03 | 0.00 | 0.03 | 0.84  | 0.40 |
| A98G  | E138A | 2  | 42  | 20 | 0.03 | 0.01 | 0.02 | 0.83  | 0.40 |
| V106I | Y232H | 1  | 30  | 5  | 0.03 | 0.00 | 0.03 | 0.83  | 0.41 |
| K101E | G190C | 1  | 59  | 2  | 0.02 | 0.00 | 0.02 | 0.83  | 0.41 |
| K103N | D237E | 4  | 730 | 4  | 0.01 | 0.01 | 0.00 | -0.82 | 0.41 |
| M230L | D237E | 1  | 25  | 7  | 0.03 | 0.01 | 0.03 | 0.80  | 0.43 |
| V108I | K238N | 1  | 67  | 2  | 0.01 | 0.00 | 0.01 | 0.80  | 0.43 |

|       |       |    |     |     |      |      |      |       |      |
|-------|-------|----|-----|-----|------|------|------|-------|------|
| V90I  | V106A | 1  | 45  | 4   | 0.02 | 0.00 | 0.02 | 0.78  | 0.43 |
| L100I | V179T | 1  | 113 | 1   | 0.01 | 0.00 | 0.01 | 0.78  | 0.43 |
| V106M | M230L | 3  | 69  | 23  | 0.03 | 0.02 | 0.02 | 0.77  | 0.44 |
| V179D | Y188C | 1  | 46  | 4   | 0.02 | 0.00 | 0.02 | 0.76  | 0.44 |
| V106I | D237E | 1  | 30  | 7   | 0.03 | 0.01 | 0.03 | 0.76  | 0.45 |
| A98G  | G190Q | 1  | 43  | 5   | 0.02 | 0.01 | 0.02 | 0.75  | 0.46 |
| F227L | K238T | 1  | 8   | 28  | 0.03 | 0.01 | 0.03 | 0.75  | 0.46 |
| V90I  | H221Y | 1  | 45  | 38  | 0.01 | 0.02 | 0.01 | -0.74 | 0.46 |
| V108I | K223T | 1  | 67  | 3   | 0.01 | 0.00 | 0.01 | 0.73  | 0.47 |
| G190S | M230L | 1  | 71  | 25  | 0.01 | 0.02 | 0.01 | -0.73 | 0.47 |
| V90I  | P225H | 5  | 40  | 75  | 0.04 | 0.03 | 0.02 | 0.72  | 0.47 |
| V90I  | K101H | 1  | 45  | 6   | 0.02 | 0.01 | 0.02 | 0.72  | 0.47 |
| A98G  | M230L | 2  | 42  | 24  | 0.03 | 0.01 | 0.02 | 0.70  | 0.48 |
| K101N | K103N | 3  | 3   | 728 | 0    | 0.01 | 0.00 | -0.69 | 0.49 |
| V90I  | A98G  | 3  | 42  | 41  | 0.03 | 0.02 | 0.02 | 0.69  | 0.49 |
| E138Q | Y188L | 1  | 3   | 88  | 0.01 | 0.00 | 0.01 | 0.68  | 0.49 |
| V106I | Y188H | 1  | 30  | 11  | 0.02 | 0.01 | 0.02 | 0.68  | 0.50 |
| V179D | H221Y | 1  | 44  | 38  | 0.01 | 0.02 | 0.01 | -0.68 | 0.50 |
| V106A | G190A | 1  | 4   | 75  | 0.01 | 0.00 | 0.01 | 0.67  | 0.50 |
| Y188L | K223T | 1  | 88  | 3   | 0.01 | 0.00 | 0.01 | 0.66  | 0.51 |
| E138A | P225H | 1  | 21  | 80  | 0.01 | 0.02 | 0.01 | -0.65 | 0.51 |
| V108I | M230L | 1  | 67  | 25  | 0.01 | 0.02 | 0.01 | -0.64 | 0.52 |
| K101E | K238T | 1  | 59  | 28  | 0.01 | 0.02 | 0.01 | -0.62 | 0.53 |
| K101N | G190S | 1  | 5   | 69  | 0.01 | 0.01 | 0.01 | 0.62  | 0.54 |
| K101N | V106M | 1  | 5   | 70  | 0.01 | 0.00 | 0.01 | 0.62  | 0.54 |
| V106A | P225H | 1  | 4   | 80  | 0.01 | 0.00 | 0.01 | 0.61  | 0.54 |
| G190A | Y232H | 1  | 75  | 5   | 0.01 | 0.01 | 0.01 | 0.59  | 0.56 |
| Y188H | H221Y | 1  | 11  | 38  | 0.02 | 0.01 | 0.02 | 0.58  | 0.56 |
| K103N | K223T | 2  | 731 | 2   | 0    | 0.00 | 0.00 | -0.57 | 0.57 |
| K103N | E138Q | 2  | 731 | 2   | 0    | 0.00 | 0.00 | -0.56 | 0.58 |
| V90I  | Y188L | 5  | 41  | 82  | 0.04 | 0.03 | 0.02 | 0.55  | 0.58 |
| K101H | V108I | 1  | 6   | 67  | 0.01 | 0.01 | 0.01 | 0.54  | 0.59 |
| E138A | G190A | 1  | 21  | 75  | 0.01 | 0.02 | 0.01 | -0.54 | 0.59 |
| K103N | K238N | 3  | 725 | 0   | 0    | 0.00 | 0.00 | 0.53  | 0.60 |
| K102N | K103N | 3  | 0   | 727 | 0    | 0.00 | 0.00 | 0.52  | 0.60 |
| L100I | M230L | 2  | 112 | 24  | 0.01 | 0.02 | 0.01 | -0.52 | 0.60 |
| V106M | D237E | 1  | 71  | 7   | 0.01 | 0.01 | 0.01 | 0.50  | 0.62 |
| V179D | Y188H | 1  | 46  | 11  | 0.02 | 0.01 | 0.02 | 0.48  | 0.63 |
| G190A | D237E | 1  | 75  | 7   | 0.01 | 0.01 | 0.01 | 0.47  | 0.64 |
| K103N | H221Y | 28 | 679 | 9   | 0.04 | 0.04 | 0.01 | 0.46  | 0.65 |
| K101E | Y188L | 4  | 56  | 84  | 0.03 | 0.03 | 0.01 | -0.44 | 0.66 |
| K103N | V241M | 2  | 729 | 0   | 0    | 0.00 | 0.00 | 0.44  | 0.66 |

|       |       |    |     |     |      |      |      |       |      |
|-------|-------|----|-----|-----|------|------|------|-------|------|
| K103N | Y318F | 1  | 733 | 1   | 0    | 0.00 | 0.00 | -0.41 | 0.68 |
| V108I | F227L | 1  | 66  | 8   | 0.01 | 0.01 | 0.01 | 0.41  | 0.68 |
| K103N | Y181I | 1  | 733 | 1   | 0    | 0.00 | 0.00 | -0.40 | 0.69 |
| G190A | F227L | 1  | 71  | 8   | 0.01 | 0.01 | 0.01 | 0.40  | 0.69 |
| K103N | T139R | 1  | 731 | 1   | 0    | 0.00 | 0.00 | -0.39 | 0.70 |
| K103N | V179T | 1  | 732 | 1   | 0    | 0.00 | 0.00 | -0.39 | 0.70 |
| Y181C | M230L | 1  | 57  | 25  | 0.01 | 0.02 | 0.01 | -0.37 | 0.71 |
| E138A | K238T | 1  | 21  | 28  | 0.02 | 0.01 | 0.02 | 0.37  | 0.71 |
| V90I  | V106I | 1  | 45  | 30  | 0.01 | 0.02 | 0.01 | -0.35 | 0.73 |
| A98G  | Y188L | 4  | 38  | 85  | 0.03 | 0.03 | 0.02 | 0.35  | 0.73 |
| Y188L | D237E | 1  | 88  | 7   | 0.01 | 0.01 | 0.01 | 0.34  | 0.73 |
| V106I | M230L | 1  | 29  | 25  | 0.02 | 0.01 | 0.02 | 0.33  | 0.74 |
| V179D | Y181C | 2  | 45  | 56  | 0.02 | 0.02 | 0.01 | -0.33 | 0.74 |
| K103N | M230L | 17 | 713 | 9   | 0.02 | 0.02 | 0.01 | -0.32 | 0.75 |
| A98G  | H221Y | 2  | 41  | 37  | 0.03 | 0.02 | 0.02 | 0.30  | 0.77 |
| G190S | H221Y | 3  | 68  | 35  | 0.03 | 0.02 | 0.02 | 0.30  | 0.77 |
| A98G  | K103N | 28 | 14  | 698 | 0.04 | 0.04 | 0.01 | -0.29 | 0.77 |
| M230L | K238T | 1  | 25  | 27  | 0.02 | 0.01 | 0.02 | 0.28  | 0.78 |
| V90I  | K101E | 3  | 43  | 55  | 0.03 | 0.02 | 0.02 | 0.28  | 0.78 |
| K103N | V106A | 3  | 728 | 2   | 0    | 0.00 | 0.00 | -0.28 | 0.78 |
| K101P | K238T | 1  | 25  | 28  | 0.02 | 0.01 | 0.02 | 0.27  | 0.79 |
| K101P | K103N | 18 | 6   | 711 | 0.02 | 0.02 | 0.01 | 0.27  | 0.79 |
| A98G  | V106I | 1  | 43  | 30  | 0.01 | 0.02 | 0.01 | -0.26 | 0.79 |
| V106M | Y188H | 1  | 71  | 11  | 0.01 | 0.01 | 0.01 | 0.21  | 0.83 |
| V179D | K238T | 1  | 46  | 28  | 0.01 | 0.02 | 0.01 | -0.21 | 0.84 |
| K103N | Y188H | 8  | 717 | 4   | 0.01 | 0.01 | 0.00 | -0.16 | 0.87 |
| A98G  | L100I | 4  | 37  | 108 | 0.03 | 0.03 | 0.01 | -0.16 | 0.87 |
| G190A | H221Y | 3  | 71  | 36  | 0.03 | 0.02 | 0.02 | 0.15  | 0.88 |
| L100I | H221Y | 4  | 101 | 34  | 0.03 | 0.03 | 0.01 | 0.14  | 0.89 |
| L100I | D237E | 1  | 113 | 7   | 0.01 | 0.01 | 0.01 | 0.14  | 0.89 |
| V106I | G190A | 2  | 29  | 73  | 0.02 | 0.02 | 0.01 | -0.11 | 0.91 |
| V90I  | K101P | 1  | 45  | 25  | 0.01 | 0.02 | 0.01 | -0.11 | 0.91 |
| V90I  | E138A | 1  | 45  | 20  | 0.02 | 0.01 | 0.02 | 0.11  | 0.91 |
| K103N | Y232H | 4  | 730 | 2   | 0.01 | 0.01 | 0.00 | -0.11 | 0.91 |
| A98G  | K238T | 1  | 43  | 27  | 0.01 | 0.02 | 0.01 | -0.10 | 0.92 |
| V90I  | V108I | 3  | 41  | 64  | 0.03 | 0.03 | 0.02 | 0.08  | 0.93 |
| V106I | H221Y | 1  | 30  | 37  | 0.01 | 0.02 | 0.01 | -0.08 | 0.94 |
| H221Y | M230L | 1  | 38  | 24  | 0.02 | 0.01 | 0.02 | 0.07  | 0.94 |
| K101P | H221Y | 1  | 25  | 38  | 0.02 | 0.01 | 0.02 | 0.07  | 0.95 |
| P225H | K238T | 2  | 77  | 26  | 0.02 | 0.02 | 0.01 | -0.06 | 0.95 |
| I94L  | K103N | 2  | 1   | 731 | 0    | 0.00 | 0.00 | -0.06 | 0.95 |
| V90I  | M230L | 1  | 45  | 24  | 0.01 | 0.02 | 0.01 | -0.05 | 0.96 |

|       |       |   |     |     |      |      |      |       |      |
|-------|-------|---|-----|-----|------|------|------|-------|------|
| G190A | K238T | 2 | 73  | 27  | 0.02 | 0.02 | 0.01 | -0.05 | 0.96 |
| L100I | F227L | 1 | 113 | 8   | 0.01 | 0.01 | 0.01 | 0.04  | 0.97 |
| V90I  | V179D | 2 | 43  | 45  | 0.02 | 0.02 | 0.02 | -0.03 | 0.98 |
| E138A | V179D | 1 | 21  | 46  | 0.01 | 0.01 | 0.01 | 0.03  | 0.98 |
| P225H | M230L | 2 | 79  | 24  | 0.02 | 0.02 | 0.01 | 0.00  | 1.00 |
| V106I | G190S | 2 | 29  | 69  | 0.02 | 0.02 | 0.01 | 0.00  | 1.00 |
| V90I  | K101N | 0 | 46  | 6   | 0    | 0.00 | 0.00 | NA    |      |
| V90I  | K102N | 0 | 46  | 3   | 0    | 0.00 | 0.00 | NA    |      |
| V90I  | K103S | 0 | 46  | 2   | 0    | 0.00 | 0.00 | NA    |      |
| V90I  | E138Q | 0 | 45  | 4   | 0    | 0.00 | 0.00 | NA    |      |
| V90I  | T139R | 0 | 46  | 2   | 0    | 0.00 | 0.00 | NA    |      |
| V90I  | V179T | 0 | 46  | 2   | 0    | 0.00 | 0.00 | NA    |      |
| V90I  | Y181I | 0 | 46  | 2   | 0    | 0.00 | 0.00 | NA    |      |
| V90I  | Y188C | 0 | 46  | 5   | 0    | 0.00 | 0.00 | NA    |      |
| V90I  | Y188H | 0 | 46  | 12  | 0    | 0.01 | 0.00 | NA    |      |
| V90I  | G190E | 0 | 46  | 15  | 0    | 0.01 | 0.00 | NA    |      |
| V90I  | G190Q | 0 | 46  | 6   | 0    | 0.01 | 0.00 | NA    |      |
| V90I  | G190C | 0 | 46  | 3   | 0    | 0.00 | 0.00 | NA    |      |
| V90I  | K223T | 0 | 46  | 4   | 0    | 0.00 | 0.00 | NA    |      |
| V90I  | F227L | 0 | 46  | 9   | 0    | 0.01 | 0.00 | NA    |      |
| V90I  | Y232H | 0 | 46  | 6   | 0    | 0.00 | 0.00 | NA    |      |
| V90I  | D237E | 0 | 46  | 8   | 0    | 0.01 | 0.00 | NA    |      |
| V90I  | K238T | 0 | 46  | 29  | 0    | 0.02 | 0.00 | NA    |      |
| V90I  | K238N | 0 | 46  | 3   | 0    | 0.00 | 0.00 | NA    |      |
| V90I  | V241M | 0 | 46  | 2   | 0    | 0.00 | 0.00 | NA    |      |
| V90I  | Q242L | 0 | 46  | 2   | 0    | 0.00 | 0.00 | NA    |      |
| V90I  | Y318F | 0 | 46  | 2   | 0    | 0.00 | 0.00 | NA    |      |
| I94L  | A98G  | 0 | 3   | 43  | 0    | 0.00 | 0.00 | NA    |      |
| I94L  | L100I | 0 | 3   | 114 | 0    | 0.00 | 0.00 | NA    |      |
| I94L  | K101E | 0 | 3   | 60  | 0    | 0.00 | 0.00 | NA    |      |
| I94L  | K101P | 0 | 3   | 26  | 0    | 0.00 | 0.00 | NA    |      |
| I94L  | K101H | 0 | 3   | 7   | 0    | 0.00 | 0.00 | NA    |      |
| I94L  | K101N | 0 | 3   | 6   | 0    | 0.00 | 0.00 | NA    |      |
| I94L  | K102N | 0 | 3   | 3   | 0    | 0.00 | 0.00 | NA    |      |
| I94L  | K103S | 0 | 3   | 2   | 0    | 0.00 | 0.00 | NA    |      |
| I94L  | V106A | 0 | 3   | 5   | 0    | 0.00 | 0.00 | NA    |      |
| I94L  | V106I | 0 | 3   | 31  | 0    | 0.00 | 0.00 | NA    |      |
| I94L  | V106M | 0 | 3   | 72  | 0    | 0.00 | 0.00 | NA    |      |
| I94L  | V108I | 0 | 3   | 67  | 0    | 0.00 | 0.00 | NA    |      |
| I94L  | E138Q | 0 | 3   | 4   | 0    | 0.00 | 0.00 | NA    |      |
| I94L  | E138A | 0 | 3   | 22  | 0    | 0.00 | 0.00 | NA    |      |
| I94L  | T139R | 0 | 3   | 2   | 0    | 0.00 | 0.00 | NA    |      |

|      |       |   |    |    |   |      |      |    |
|------|-------|---|----|----|---|------|------|----|
| I94L | V179D | 0 | 3  | 47 | 0 | 0.00 | 0.00 | NA |
| I94L | V179T | 0 | 3  | 2  | 0 | 0.00 | 0.00 | NA |
| I94L | Y181C | 0 | 3  | 58 | 0 | 0.00 | 0.00 | NA |
| I94L | Y181I | 0 | 3  | 2  | 0 | 0.00 | 0.00 | NA |
| I94L | Y188L | 0 | 3  | 89 | 0 | 0.00 | 0.00 | NA |
| I94L | Y188C | 0 | 3  | 5  | 0 | 0.00 | 0.00 | NA |
| I94L | Y188H | 0 | 3  | 12 | 0 | 0.00 | 0.00 | NA |
| I94L | G190S | 0 | 3  | 72 | 0 | 0.00 | 0.00 | NA |
| I94L | G190Q | 0 | 3  | 5  | 0 | 0.00 | 0.00 | NA |
| I94L | G190C | 0 | 3  | 3  | 0 | 0.00 | 0.00 | NA |
| I94L | H221Y | 0 | 3  | 39 | 0 | 0.00 | 0.00 | NA |
| I94L | K223T | 0 | 3  | 4  | 0 | 0.00 | 0.00 | NA |
| I94L | P225H | 0 | 3  | 81 | 0 | 0.00 | 0.00 | NA |
| I94L | F227L | 0 | 3  | 9  | 0 | 0.00 | 0.00 | NA |
| I94L | M230L | 0 | 3  | 26 | 0 | 0.00 | 0.00 | NA |
| I94L | Y232H | 0 | 3  | 6  | 0 | 0.00 | 0.00 | NA |
| I94L | D237E | 0 | 3  | 8  | 0 | 0.00 | 0.00 | NA |
| I94L | K238T | 0 | 3  | 29 | 0 | 0.00 | 0.00 | NA |
| I94L | K238N | 0 | 3  | 3  | 0 | 0.00 | 0.00 | NA |
| I94L | V241M | 0 | 3  | 2  | 0 | 0.00 | 0.00 | NA |
| I94L | Q242L | 0 | 3  | 2  | 0 | 0.00 | 0.00 | NA |
| I94L | Y318F | 0 | 3  | 2  | 0 | 0.00 | 0.00 | NA |
| A98G | K101E | 0 | 43 | 60 | 0 | 0.02 | 0.00 | NA |
| A98G | K101P | 0 | 44 | 26 | 0 | 0.02 | 0.00 | NA |
| A98G | K101H | 0 | 44 | 7  | 0 | 0.01 | 0.00 | NA |
| A98G | K101N | 0 | 44 | 6  | 0 | 0.00 | 0.00 | NA |
| A98G | K102N | 0 | 44 | 3  | 0 | 0.00 | 0.00 | NA |
| A98G | K103S | 0 | 44 | 2  | 0 | 0.00 | 0.00 | NA |
| A98G | V106A | 0 | 44 | 5  | 0 | 0.00 | 0.00 | NA |
| A98G | V106M | 0 | 43 | 72 | 0 | 0.03 | 0.00 | NA |
| A98G | E138Q | 0 | 44 | 4  | 0 | 0.00 | 0.00 | NA |
| A98G | T139R | 0 | 44 | 2  | 0 | 0.00 | 0.00 | NA |
| A98G | V179T | 0 | 44 | 2  | 0 | 0.00 | 0.00 | NA |
| A98G | Y181I | 0 | 44 | 2  | 0 | 0.00 | 0.00 | NA |
| A98G | Y188C | 0 | 44 | 5  | 0 | 0.00 | 0.00 | NA |
| A98G | Y188H | 0 | 43 | 12 | 0 | 0.01 | 0.00 | NA |
| A98G | G190E | 0 | 44 | 15 | 0 | 0.01 | 0.00 | NA |
| A98G | F227L | 0 | 43 | 9  | 0 | 0.01 | 0.00 | NA |
| A98G | Y232H | 0 | 44 | 6  | 0 | 0.01 | 0.00 | NA |
| A98G | D237E | 0 | 44 | 8  | 0 | 0.01 | 0.00 | NA |
| A98G | K238N | 0 | 44 | 3  | 0 | 0.00 | 0.00 | NA |
| A98G | V241M | 0 | 44 | 2  | 0 | 0.00 | 0.00 | NA |

|       |       |   |     |    |   |      |      |    |
|-------|-------|---|-----|----|---|------|------|----|
| A98G  | Q242L | 0 | 43  | 2  | 0 | 0.00 | 0.00 | NA |
| L100I | K101P | 0 | 114 | 26 | 0 | 0.02 | 0.00 | NA |
| L100I | K101H | 0 | 114 | 7  | 0 | 0.01 | 0.00 | NA |
| L100I | K101N | 0 | 114 | 6  | 0 | 0.01 | 0.00 | NA |
| L100I | K102N | 0 | 114 | 3  | 0 | 0.00 | 0.00 | NA |
| L100I | K103S | 0 | 113 | 2  | 0 | 0.00 | 0.00 | NA |
| L100I | V106A | 0 | 114 | 5  | 0 | 0.00 | 0.00 | NA |
| L100I | V106I | 0 | 114 | 30 | 0 | 0.02 | 0.00 | NA |
| L100I | E138Q | 0 | 114 | 4  | 0 | 0.00 | 0.00 | NA |
| L100I | E138A | 0 | 114 | 20 | 0 | 0.02 | 0.00 | NA |
| L100I | T139R | 0 | 113 | 2  | 0 | 0.00 | 0.00 | NA |
| L100I | V179D | 0 | 113 | 47 | 0 | 0.03 | 0.00 | NA |
| L100I | Y181C | 0 | 114 | 57 | 0 | 0.04 | 0.00 | NA |
| L100I | Y181I | 0 | 114 | 2  | 0 | 0.00 | 0.00 | NA |
| L100I | Y188C | 0 | 114 | 5  | 0 | 0.00 | 0.00 | NA |
| L100I | Y188H | 0 | 113 | 12 | 0 | 0.01 | 0.00 | NA |
| L100I | G190S | 0 | 114 | 72 | 0 | 0.04 | 0.00 | NA |
| L100I | G190E | 0 | 114 | 15 | 0 | 0.01 | 0.00 | NA |
| L100I | G190Q | 0 | 114 | 6  | 0 | 0.01 | 0.00 | NA |
| L100I | G190C | 0 | 114 | 3  | 0 | 0.00 | 0.00 | NA |
| L100I | K223T | 0 | 114 | 4  | 0 | 0.00 | 0.00 | NA |
| L100I | Y232H | 0 | 114 | 6  | 0 | 0.01 | 0.00 | NA |
| L100I | K238N | 0 | 114 | 3  | 0 | 0.00 | 0.00 | NA |
| L100I | V241M | 0 | 114 | 2  | 0 | 0.00 | 0.00 | NA |
| L100I | Q242L | 0 | 114 | 2  | 0 | 0.00 | 0.00 | NA |
| L100I | Y318F | 0 | 114 | 2  | 0 | 0.00 | 0.00 | NA |
| K101E | K101P | 0 | 60  | 26 | 0 | 0.02 | 0.00 | NA |
| K101E | K101H | 0 | 60  | 7  | 0 | 0.01 | 0.00 | NA |
| K101E | K101N | 0 | 60  | 6  | 0 | 0.01 | 0.00 | NA |
| K101E | K102N | 0 | 59  | 3  | 0 | 0.00 | 0.00 | NA |
| K101E | K103S | 0 | 60  | 2  | 0 | 0.00 | 0.00 | NA |
| K101E | V106A | 0 | 60  | 5  | 0 | 0.00 | 0.00 | NA |
| K101E | T139R | 0 | 59  | 2  | 0 | 0.00 | 0.00 | NA |
| K101E | V179D | 0 | 59  | 47 | 0 | 0.02 | 0.00 | NA |
| K101E | V179T | 0 | 60  | 2  | 0 | 0.00 | 0.00 | NA |
| K101E | Y181I | 0 | 60  | 2  | 0 | 0.00 | 0.00 | NA |
| K101E | Y188C | 0 | 60  | 5  | 0 | 0.00 | 0.00 | NA |
| K101E | Y188H | 0 | 60  | 12 | 0 | 0.01 | 0.00 | NA |
| K101E | G190E | 0 | 60  | 15 | 0 | 0.01 | 0.00 | NA |
| K101E | G190Q | 0 | 60  | 6  | 0 | 0.01 | 0.00 | NA |
| K101E | K223T | 0 | 60  | 4  | 0 | 0.00 | 0.00 | NA |
| K101E | P225H | 0 | 60  | 80 | 0 | 0.03 | 0.00 | NA |

|       |       |   |    |    |   |      |      |    |
|-------|-------|---|----|----|---|------|------|----|
| K101E | F227L | 0 | 57 | 9  | 0 | 0.01 | 0.00 | NA |
| K101E | Y232H | 0 | 60 | 6  | 0 | 0.01 | 0.00 | NA |
| K101E | D237E | 0 | 60 | 8  | 0 | 0.01 | 0.00 | NA |
| K101E | K238N | 0 | 60 | 3  | 0 | 0.00 | 0.00 | NA |
| K101E | V241M | 0 | 60 | 2  | 0 | 0.00 | 0.00 | NA |
| K101E | Q242L | 0 | 60 | 2  | 0 | 0.00 | 0.00 | NA |
| K101E | Y318F | 0 | 60 | 2  | 0 | 0.00 | 0.00 | NA |
| K101P | K101H | 0 | 26 | 7  | 0 | 0.01 | 0.00 | NA |
| K101P | K101N | 0 | 26 | 6  | 0 | 0.00 | 0.00 | NA |
| K101P | K102N | 0 | 26 | 3  | 0 | 0.00 | 0.00 | NA |
| K101P | K103S | 0 | 25 | 2  | 0 | 0.00 | 0.00 | NA |
| K101P | V106A | 0 | 26 | 5  | 0 | 0.00 | 0.00 | NA |
| K101P | V106I | 0 | 25 | 31 | 0 | 0.01 | 0.00 | NA |
| K101P | V106M | 0 | 26 | 72 | 0 | 0.02 | 0.00 | NA |
| K101P | V108I | 0 | 26 | 68 | 0 | 0.02 | 0.00 | NA |
| K101P | E138A | 0 | 26 | 22 | 0 | 0.01 | 0.00 | NA |
| K101P | T139R | 0 | 26 | 2  | 0 | 0.00 | 0.00 | NA |
| K101P | V179D | 0 | 26 | 47 | 0 | 0.02 | 0.00 | NA |
| K101P | V179T | 0 | 26 | 2  | 0 | 0.00 | 0.00 | NA |
| K101P | Y181C | 0 | 26 | 58 | 0 | 0.02 | 0.00 | NA |
| K101P | Y181I | 0 | 26 | 2  | 0 | 0.00 | 0.00 | NA |
| K101P | Y188L | 0 | 26 | 89 | 0 | 0.02 | 0.00 | NA |
| K101P | Y188C | 0 | 26 | 5  | 0 | 0.00 | 0.00 | NA |
| K101P | Y188H | 0 | 26 | 12 | 0 | 0.01 | 0.00 | NA |
| K101P | G190S | 0 | 25 | 71 | 0 | 0.02 | 0.00 | NA |
| K101P | G190E | 0 | 26 | 15 | 0 | 0.01 | 0.00 | NA |
| K101P | G190Q | 0 | 26 | 6  | 0 | 0.00 | 0.00 | NA |
| K101P | G190C | 0 | 26 | 3  | 0 | 0.00 | 0.00 | NA |
| K101P | K223T | 0 | 26 | 4  | 0 | 0.00 | 0.00 | NA |
| K101P | P225H | 0 | 26 | 81 | 0 | 0.02 | 0.00 | NA |
| K101P | F227L | 0 | 26 | 9  | 0 | 0.01 | 0.00 | NA |
| K101P | M230L | 0 | 26 | 26 | 0 | 0.01 | 0.00 | NA |
| K101P | Y232H | 0 | 26 | 6  | 0 | 0.00 | 0.00 | NA |
| K101P | D237E | 0 | 26 | 8  | 0 | 0.01 | 0.00 | NA |
| K101P | K238N | 0 | 26 | 3  | 0 | 0.00 | 0.00 | NA |
| K101P | V241M | 0 | 26 | 2  | 0 | 0.00 | 0.00 | NA |
| K101P | Q242L | 0 | 26 | 2  | 0 | 0.00 | 0.00 | NA |
| K101P | Y318F | 0 | 26 | 2  | 0 | 0.00 | 0.00 | NA |
| K101H | K101N | 0 | 7  | 6  | 0 | 0.00 | 0.00 | NA |
| K101H | K102N | 0 | 7  | 3  | 0 | 0.00 | 0.00 | NA |
| K101H | K103S | 0 | 7  | 2  | 0 | 0.00 | 0.00 | NA |
| K101H | V106A | 0 | 7  | 5  | 0 | 0.00 | 0.00 | NA |



|       |       |   |   |    |   |      |      |    |
|-------|-------|---|---|----|---|------|------|----|
| K101H | V106I | 0 | 7 | 31 | 0 | 0.01 | 0.00 | NA |
| K101H | V106M | 0 | 7 | 71 | 0 | 0.01 | 0.00 | NA |
| K101H | E138Q | 0 | 7 | 4  | 0 | 0.00 | 0.00 | NA |
| K101H | E138A | 0 | 7 | 22 | 0 | 0.01 | 0.00 | NA |
| K101H | T139R | 0 | 7 | 2  | 0 | 0.00 | 0.00 | NA |
| K101H | V179D | 0 | 7 | 47 | 0 | 0.01 | 0.00 | NA |
| K101H | V179T | 0 | 7 | 2  | 0 | 0.00 | 0.00 | NA |
| K101H | Y18II | 0 | 7 | 2  | 0 | 0.00 | 0.00 | NA |
| K101H | Y188L | 0 | 7 | 89 | 0 | 0.01 | 0.00 | NA |
| K101H | Y188C | 0 | 7 | 5  | 0 | 0.00 | 0.00 | NA |
| K101H | Y188H | 0 | 7 | 12 | 0 | 0.00 | 0.00 | NA |
| K101H | G190E | 0 | 7 | 15 | 0 | 0.00 | 0.00 | NA |
| K101H | G190Q | 0 | 7 | 6  | 0 | 0.00 | 0.00 | NA |
| K101H | G190C | 0 | 7 | 3  | 0 | 0.00 | 0.00 | NA |
| K101H | H221Y | 0 | 7 | 39 | 0 | 0.01 | 0.00 | NA |
| K101H | K223T | 0 | 7 | 4  | 0 | 0.00 | 0.00 | NA |
| K101H | P225H | 0 | 7 | 81 | 0 | 0.01 | 0.00 | NA |
| K101H | F227L | 0 | 7 | 9  | 0 | 0.00 | 0.00 | NA |
| K101H | M230L | 0 | 7 | 26 | 0 | 0.01 | 0.00 | NA |
| K101H | Y232H | 0 | 7 | 6  | 0 | 0.00 | 0.00 | NA |
| K101H | D237E | 0 | 7 | 8  | 0 | 0.00 | 0.00 | NA |
| K101H | K238T | 0 | 6 | 29 | 0 | 0.00 | 0.00 | NA |
| K101H | K238N | 0 | 7 | 3  | 0 | 0.00 | 0.00 | NA |
| K101H | V241M | 0 | 7 | 2  | 0 | 0.00 | 0.00 | NA |
| K101H | Y318F | 0 | 7 | 2  | 0 | 0.00 | 0.00 | NA |
| K101N | K102N | 0 | 6 | 3  | 0 | 0.00 | 0.00 | NA |
| K101N | K103S | 0 | 6 | 2  | 0 | 0.00 | 0.00 | NA |
| K101N | V106A | 0 | 6 | 5  | 0 | 0.00 | 0.00 | NA |
| K101N | V106I | 0 | 6 | 31 | 0 | 0.00 | 0.00 | NA |
| K101N | V108I | 0 | 5 | 68 | 0 | 0.00 | 0.00 | NA |
| K101N | E138Q | 0 | 6 | 4  | 0 | 0.00 | 0.00 | NA |
| K101N | E138A | 0 | 6 | 22 | 0 | 0.00 | 0.00 | NA |
| K101N | T139R | 0 | 6 | 2  | 0 | 0.00 | 0.00 | NA |
| K101N | V179D | 0 | 6 | 47 | 0 | 0.01 | 0.00 | NA |
| K101N | V179T | 0 | 6 | 2  | 0 | 0.00 | 0.00 | NA |
| K101N | Y18II | 0 | 6 | 2  | 0 | 0.00 | 0.00 | NA |
| K101N | Y188L | 0 | 6 | 89 | 0 | 0.00 | 0.00 | NA |
| K101N | Y188C | 0 | 6 | 5  | 0 | 0.00 | 0.00 | NA |
| K101N | Y188H | 0 | 6 | 12 | 0 | 0.00 | 0.00 | NA |
| K101N | G190E | 0 | 6 | 15 | 0 | 0.00 | 0.00 | NA |
| K101N | G190Q | 0 | 6 | 6  | 0 | 0.00 | 0.00 | NA |
| K101N | G190C | 0 | 6 | 3  | 0 | 0.00 | 0.00 | NA |

|       |       |   |   |    |   |      |      |    |
|-------|-------|---|---|----|---|------|------|----|
| K101N | H221Y | 0 | 6 | 39 | 0 | 0.01 | 0.00 | NA |
| K101N | K223T | 0 | 6 | 4  | 0 | 0.00 | 0.00 | NA |
| K101N | P225H | 0 | 6 | 80 | 0 | 0.01 | 0.00 | NA |
| K101N | F227L | 0 | 6 | 9  | 0 | 0.00 | 0.00 | NA |
| K101N | M230L | 0 | 6 | 26 | 0 | 0.00 | 0.00 | NA |
| K101N | Y232H | 0 | 6 | 6  | 0 | 0.00 | 0.00 | NA |
| K101N | D237E | 0 | 6 | 8  | 0 | 0.00 | 0.00 | NA |
| K101N | K238T | 0 | 6 | 29 | 0 | 0.00 | 0.00 | NA |
| K101N | K238N | 0 | 6 | 3  | 0 | 0.00 | 0.00 | NA |
| K101N | V241M | 0 | 6 | 2  | 0 | 0.00 | 0.00 | NA |
| K101N | Q242L | 0 | 6 | 2  | 0 | 0.00 | 0.00 | NA |
| K101N | Y318F | 0 | 6 | 2  | 0 | 0.00 | 0.00 | NA |
| K102N | K103S | 0 | 3 | 2  | 0 | 0.00 | 0.00 | NA |
| K102N | V106A | 0 | 3 | 5  | 0 | 0.00 | 0.00 | NA |
| K102N | V106I | 0 | 3 | 31 | 0 | 0.00 | 0.00 | NA |
| K102N | V106M | 0 | 3 | 72 | 0 | 0.00 | 0.00 | NA |
| K102N | V108I | 0 | 3 | 68 | 0 | 0.00 | 0.00 | NA |
| K102N | E138Q | 0 | 3 | 4  | 0 | 0.00 | 0.00 | NA |
| K102N | E138A | 0 | 3 | 22 | 0 | 0.00 | 0.00 | NA |
| K102N | T139R | 0 | 3 | 2  | 0 | 0.00 | 0.00 | NA |
| K102N | V179D | 0 | 3 | 47 | 0 | 0.00 | 0.00 | NA |
| K102N | V179T | 0 | 3 | 2  | 0 | 0.00 | 0.00 | NA |
| K102N | Y181C | 0 | 3 | 58 | 0 | 0.00 | 0.00 | NA |
| K102N | Y181I | 0 | 3 | 2  | 0 | 0.00 | 0.00 | NA |
| K102N | Y188L | 0 | 2 | 88 | 0 | 0.00 | 0.00 | NA |
| K102N | Y188C | 0 | 3 | 5  | 0 | 0.00 | 0.00 | NA |
| K102N | Y188H | 0 | 2 | 12 | 0 | 0.00 | 0.00 | NA |
| K102N | G190S | 0 | 3 | 71 | 0 | 0.00 | 0.00 | NA |
| K102N | G190E | 0 | 3 | 15 | 0 | 0.00 | 0.00 | NA |
| K102N | G190Q | 0 | 3 | 6  | 0 | 0.00 | 0.00 | NA |
| K102N | G190C | 0 | 3 | 3  | 0 | 0.00 | 0.00 | NA |
| K102N | H221Y | 0 | 3 | 38 | 0 | 0.00 | 0.00 | NA |
| K102N | K223T | 0 | 3 | 4  | 0 | 0.00 | 0.00 | NA |
| K102N | P225H | 0 | 3 | 81 | 0 | 0.00 | 0.00 | NA |
| K102N | F227L | 0 | 3 | 9  | 0 | 0.00 | 0.00 | NA |
| K102N | M230L | 0 | 3 | 25 | 0 | 0.00 | 0.00 | NA |
| K102N | Y232H | 0 | 3 | 6  | 0 | 0.00 | 0.00 | NA |
| K102N | D237E | 0 | 3 | 8  | 0 | 0.00 | 0.00 | NA |
| K102N | K238T | 0 | 3 | 28 | 0 | 0.00 | 0.00 | NA |
| K102N | K238N | 0 | 3 | 3  | 0 | 0.00 | 0.00 | NA |
| K102N | V241M | 0 | 3 | 2  | 0 | 0.00 | 0.00 | NA |
| K102N | Q242L | 0 | 3 | 2  | 0 | 0.00 | 0.00 | NA |

|       |       |   |     |    |   |      |      |    |
|-------|-------|---|-----|----|---|------|------|----|
| K102N | Y318F | 0 | 3   | 2  | 0 | 0.00 | 0.00 | NA |
| K103N | K103S | 0 | 734 | 2  | 0 | 0.00 | 0.00 | NA |
| K103N | V179D | 0 | 732 | 47 | 0 | 0.04 | 0.00 | NA |
| K103N | Y188C | 0 | 732 | 5  | 0 | 0.00 | 0.00 | NA |
| K103N | G190E | 0 | 734 | 15 | 0 | 0.01 | 0.00 | NA |
| K103N | G190Q | 0 | 734 | 6  | 0 | 0.01 | 0.00 | NA |
| K103N | G190C | 0 | 734 | 3  | 0 | 0.00 | 0.00 | NA |
| K103S | V106A | 0 | 2   | 5  | 0 | 0.00 | 0.00 | NA |
| K103S | V106I | 0 | 2   | 31 | 0 | 0.00 | 0.00 | NA |
| K103S | V108I | 0 | 2   | 68 | 0 | 0.00 | 0.00 | NA |
| K103S | E138Q | 0 | 2   | 4  | 0 | 0.00 | 0.00 | NA |
| K103S | E138A | 0 | 2   | 22 | 0 | 0.00 | 0.00 | NA |
| K103S | T139R | 0 | 2   | 2  | 0 | 0.00 | 0.00 | NA |
| K103S | V179D | 0 | 2   | 47 | 0 | 0.00 | 0.00 | NA |
| K103S | V179T | 0 | 2   | 2  | 0 | 0.00 | 0.00 | NA |
| K103S | Y181C | 0 | 2   | 58 | 0 | 0.00 | 0.00 | NA |
| K103S | Y181I | 0 | 2   | 2  | 0 | 0.00 | 0.00 | NA |
| K103S | Y188L | 0 | 2   | 89 | 0 | 0.00 | 0.00 | NA |
| K103S | Y188C | 0 | 2   | 5  | 0 | 0.00 | 0.00 | NA |
| K103S | Y188H | 0 | 2   | 12 | 0 | 0.00 | 0.00 | NA |
| K103S | G190S | 0 | 2   | 72 | 0 | 0.00 | 0.00 | NA |
| K103S | G190E | 0 | 2   | 15 | 0 | 0.00 | 0.00 | NA |
| K103S | G190Q | 0 | 2   | 6  | 0 | 0.00 | 0.00 | NA |
| K103S | G190C | 0 | 2   | 3  | 0 | 0.00 | 0.00 | NA |
| K103S | H221Y | 0 | 2   | 39 | 0 | 0.00 | 0.00 | NA |
| K103S | K223T | 0 | 2   | 4  | 0 | 0.00 | 0.00 | NA |
| K103S | P225H | 0 | 2   | 80 | 0 | 0.00 | 0.00 | NA |
| K103S | F227L | 0 | 2   | 9  | 0 | 0.00 | 0.00 | NA |
| K103S | M230L | 0 | 2   | 26 | 0 | 0.00 | 0.00 | NA |
| K103S | Y232H | 0 | 2   | 6  | 0 | 0.00 | 0.00 | NA |
| K103S | K238T | 0 | 2   | 29 | 0 | 0.00 | 0.00 | NA |
| K103S | K238N | 0 | 2   | 3  | 0 | 0.00 | 0.00 | NA |
| K103S | V241M | 0 | 2   | 2  | 0 | 0.00 | 0.00 | NA |
| K103S | Q242L | 0 | 2   | 2  | 0 | 0.00 | 0.00 | NA |
| K103S | Y318F | 0 | 2   | 2  | 0 | 0.00 | 0.00 | NA |
| V106A | V106I | 0 | 5   | 31 | 0 | 0.00 | 0.00 | NA |
| V106A | V106M | 0 | 5   | 72 | 0 | 0.00 | 0.00 | NA |
| V106A | V108I | 0 | 5   | 68 | 0 | 0.00 | 0.00 | NA |
| V106A | E138Q | 0 | 5   | 4  | 0 | 0.00 | 0.00 | NA |
| V106A | E138A | 0 | 5   | 21 | 0 | 0.00 | 0.00 | NA |
| V106A | T139R | 0 | 5   | 2  | 0 | 0.00 | 0.00 | NA |
| V106A | V179T | 0 | 5   | 2  | 0 | 0.00 | 0.00 | NA |

|       |       |   |    |    |   |      |      |    |
|-------|-------|---|----|----|---|------|------|----|
| V106A | Y181C | 0 | 5  | 58 | 0 | 0.00 | 0.00 | NA |
| V106A | Y181I | 0 | 5  | 2  | 0 | 0.00 | 0.00 | NA |
| V106A | Y188L | 0 | 5  | 89 | 0 | 0.00 | 0.00 | NA |
| V106A | Y188C | 0 | 5  | 5  | 0 | 0.00 | 0.00 | NA |
| V106A | Y188H | 0 | 5  | 12 | 0 | 0.00 | 0.00 | NA |
| V106A | G190S | 0 | 5  | 72 | 0 | 0.00 | 0.00 | NA |
| V106A | G190E | 0 | 5  | 15 | 0 | 0.00 | 0.00 | NA |
| V106A | G190Q | 0 | 5  | 6  | 0 | 0.00 | 0.00 | NA |
| V106A | G190C | 0 | 5  | 3  | 0 | 0.00 | 0.00 | NA |
| V106A | H221Y | 0 | 5  | 39 | 0 | 0.00 | 0.00 | NA |
| V106A | K223T | 0 | 5  | 4  | 0 | 0.00 | 0.00 | NA |
| V106A | M230L | 0 | 5  | 26 | 0 | 0.00 | 0.00 | NA |
| V106A | Y232H | 0 | 5  | 6  | 0 | 0.00 | 0.00 | NA |
| V106A | D237E | 0 | 5  | 8  | 0 | 0.00 | 0.00 | NA |
| V106A | K238T | 0 | 5  | 29 | 0 | 0.00 | 0.00 | NA |
| V106A | K238N | 0 | 5  | 3  | 0 | 0.00 | 0.00 | NA |
| V106A | V241M | 0 | 5  | 2  | 0 | 0.00 | 0.00 | NA |
| V106A | Q242L | 0 | 5  | 2  | 0 | 0.00 | 0.00 | NA |
| V106A | Y318F | 0 | 5  | 2  | 0 | 0.00 | 0.00 | NA |
| V106I | V106M | 0 | 31 | 72 | 0 | 0.02 | 0.00 | NA |
| V106I | V108I | 0 | 28 | 68 | 0 | 0.02 | 0.00 | NA |
| V106I | E138Q | 0 | 31 | 4  | 0 | 0.00 | 0.00 | NA |
| V106I | T139R | 0 | 31 | 2  | 0 | 0.00 | 0.00 | NA |
| V106I | V179T | 0 | 31 | 2  | 0 | 0.00 | 0.00 | NA |
| V106I | Y181C | 0 | 31 | 56 | 0 | 0.02 | 0.00 | NA |
| V106I | Y181I | 0 | 31 | 2  | 0 | 0.00 | 0.00 | NA |
| V106I | G190E | 0 | 31 | 15 | 0 | 0.01 | 0.00 | NA |
| V106I | G190Q | 0 | 31 | 6  | 0 | 0.00 | 0.00 | NA |
| V106I | G190C | 0 | 31 | 3  | 0 | 0.00 | 0.00 | NA |
| V106I | P225H | 0 | 31 | 81 | 0 | 0.02 | 0.00 | NA |
| V106I | F227L | 0 | 31 | 9  | 0 | 0.01 | 0.00 | NA |
| V106I | K238T | 0 | 31 | 29 | 0 | 0.01 | 0.00 | NA |
| V106I | K238N | 0 | 31 | 3  | 0 | 0.00 | 0.00 | NA |
| V106I | V241M | 0 | 31 | 2  | 0 | 0.00 | 0.00 | NA |
| V106I | Q242L | 0 | 31 | 2  | 0 | 0.00 | 0.00 | NA |
| V106I | Y318F | 0 | 31 | 2  | 0 | 0.00 | 0.00 | NA |
| V106M | V108I | 0 | 71 | 68 | 0 | 0.03 | 0.00 | NA |
| V106M | E138Q | 0 | 72 | 4  | 0 | 0.00 | 0.00 | NA |
| V106M | T139R | 0 | 72 | 2  | 0 | 0.00 | 0.00 | NA |
| V106M | V179T | 0 | 72 | 2  | 0 | 0.00 | 0.00 | NA |
| V106M | Y181C | 0 | 72 | 57 | 0 | 0.03 | 0.00 | NA |
| V106M | Y181I | 0 | 72 | 2  | 0 | 0.00 | 0.00 | NA |

|       |       |   |    |    |   |      |      |    |
|-------|-------|---|----|----|---|------|------|----|
| V106M | G190E | 0 | 72 | 15 | 0 | 0.01 | 0.00 | NA |
| V106M | G190Q | 0 | 72 | 6  | 0 | 0.00 | 0.00 | NA |
| V106M | G190C | 0 | 72 | 3  | 0 | 0.00 | 0.00 | NA |
| V106M | K223T | 0 | 72 | 4  | 0 | 0.00 | 0.00 | NA |
| V106M | Y232H | 0 | 72 | 6  | 0 | 0.00 | 0.00 | NA |
| V106M | K238N | 0 | 72 | 3  | 0 | 0.00 | 0.00 | NA |
| V106M | V241M | 0 | 72 | 2  | 0 | 0.00 | 0.00 | NA |
| V106M | Y318F | 0 | 72 | 2  | 0 | 0.00 | 0.00 | NA |
| V108I | E138Q | 0 | 68 | 4  | 0 | 0.00 | 0.00 | NA |
| V108I | E138A | 0 | 68 | 22 | 0 | 0.02 | 0.00 | NA |
| V108I | V179T | 0 | 68 | 2  | 0 | 0.00 | 0.00 | NA |
| V108I | Y181I | 0 | 68 | 2  | 0 | 0.00 | 0.00 | NA |
| V108I | Y188L | 0 | 68 | 88 | 0 | 0.04 | 0.00 | NA |
| V108I | Y188C | 0 | 68 | 5  | 0 | 0.00 | 0.00 | NA |
| V108I | Y188H | 0 | 68 | 12 | 0 | 0.01 | 0.00 | NA |
| V108I | G190S | 0 | 68 | 71 | 0 | 0.03 | 0.00 | NA |
| V108I | G190E | 0 | 68 | 14 | 0 | 0.01 | 0.00 | NA |
| V108I | G190Q | 0 | 68 | 6  | 0 | 0.01 | 0.00 | NA |
| V108I | G190C | 0 | 68 | 3  | 0 | 0.00 | 0.00 | NA |
| V108I | Y232H | 0 | 68 | 6  | 0 | 0.01 | 0.00 | NA |
| V108I | D237E | 0 | 67 | 8  | 0 | 0.01 | 0.00 | NA |
| V108I | Y318F | 0 | 68 | 2  | 0 | 0.00 | 0.00 | NA |
| E138Q | E138A | 0 | 4  | 22 | 0 | 0.00 | 0.00 | NA |
| E138Q | T139R | 0 | 4  | 2  | 0 | 0.00 | 0.00 | NA |
| E138Q | V179D | 0 | 4  | 47 | 0 | 0.00 | 0.00 | NA |
| E138Q | V179T | 0 | 4  | 2  | 0 | 0.00 | 0.00 | NA |
| E138Q | Y181C | 0 | 4  | 58 | 0 | 0.00 | 0.00 | NA |
| E138Q | Y181I | 0 | 4  | 2  | 0 | 0.00 | 0.00 | NA |
| E138Q | Y188C | 0 | 4  | 5  | 0 | 0.00 | 0.00 | NA |
| E138Q | Y188H | 0 | 4  | 12 | 0 | 0.00 | 0.00 | NA |
| E138Q | G190A | 0 | 4  | 76 | 0 | 0.00 | 0.00 | NA |
| E138Q | G190E | 0 | 4  | 15 | 0 | 0.00 | 0.00 | NA |
| E138Q | G190Q | 0 | 4  | 6  | 0 | 0.00 | 0.00 | NA |
| E138Q | G190C | 0 | 4  | 3  | 0 | 0.00 | 0.00 | NA |
| E138Q | H221Y | 0 | 4  | 39 | 0 | 0.00 | 0.00 | NA |
| E138Q | K223T | 0 | 4  | 4  | 0 | 0.00 | 0.00 | NA |
| E138Q | P225H | 0 | 4  | 81 | 0 | 0.00 | 0.00 | NA |
| E138Q | F227L | 0 | 4  | 9  | 0 | 0.00 | 0.00 | NA |
| E138Q | M230L | 0 | 4  | 26 | 0 | 0.00 | 0.00 | NA |
| E138Q | Y232H | 0 | 4  | 6  | 0 | 0.00 | 0.00 | NA |
| E138Q | D237E | 0 | 4  | 8  | 0 | 0.00 | 0.00 | NA |
| E138Q | K238T | 0 | 4  | 29 | 0 | 0.00 | 0.00 | NA |

|       |       |   |    |    |   |      |      |    |
|-------|-------|---|----|----|---|------|------|----|
| E138Q | K238N | 0 | 4  | 3  | 0 | 0.00 | 0.00 | NA |
| E138Q | V241M | 0 | 4  | 2  | 0 | 0.00 | 0.00 | NA |
| E138Q | Q242L | 0 | 4  | 2  | 0 | 0.00 | 0.00 | NA |
| E138Q | Y318F | 0 | 4  | 2  | 0 | 0.00 | 0.00 | NA |
| E138A | T139R | 0 | 22 | 2  | 0 | 0.00 | 0.00 | NA |
| E138A | V179T | 0 | 22 | 2  | 0 | 0.00 | 0.00 | NA |
| E138A | Y181C | 0 | 22 | 58 | 0 | 0.01 | 0.00 | NA |
| E138A | Y181I | 0 | 22 | 2  | 0 | 0.00 | 0.00 | NA |
| E138A | Y188C | 0 | 22 | 5  | 0 | 0.00 | 0.00 | NA |
| E138A | Y188H | 0 | 22 | 12 | 0 | 0.01 | 0.00 | NA |
| E138A | G190Q | 0 | 22 | 6  | 0 | 0.00 | 0.00 | NA |
| E138A | G190C | 0 | 22 | 3  | 0 | 0.00 | 0.00 | NA |
| E138A | H221Y | 0 | 21 | 39 | 0 | 0.01 | 0.00 | NA |
| E138A | K223T | 0 | 22 | 4  | 0 | 0.00 | 0.00 | NA |
| E138A | F227L | 0 | 22 | 9  | 0 | 0.01 | 0.00 | NA |
| E138A | M230L | 0 | 22 | 26 | 0 | 0.01 | 0.00 | NA |
| E138A | Y232H | 0 | 22 | 6  | 0 | 0.00 | 0.00 | NA |
| E138A | D237E | 0 | 22 | 8  | 0 | 0.01 | 0.00 | NA |
| E138A | K238N | 0 | 22 | 3  | 0 | 0.00 | 0.00 | NA |
| E138A | V241M | 0 | 22 | 2  | 0 | 0.00 | 0.00 | NA |
| E138A | Q242L | 0 | 22 | 2  | 0 | 0.00 | 0.00 | NA |
| E138A | Y318F | 0 | 22 | 2  | 0 | 0.00 | 0.00 | NA |
| T139R | V179D | 0 | 2  | 47 | 0 | 0.00 | 0.00 | NA |
| T139R | V179T | 0 | 2  | 2  | 0 | 0.00 | 0.00 | NA |
| T139R | Y181C | 0 | 2  | 57 | 0 | 0.00 | 0.00 | NA |
| T139R | Y181I | 0 | 2  | 2  | 0 | 0.00 | 0.00 | NA |
| T139R | Y188L | 0 | 2  | 89 | 0 | 0.00 | 0.00 | NA |
| T139R | Y188C | 0 | 2  | 5  | 0 | 0.00 | 0.00 | NA |
| T139R | Y188H | 0 | 2  | 12 | 0 | 0.00 | 0.00 | NA |
| T139R | G190A | 0 | 2  | 75 | 0 | 0.00 | 0.00 | NA |
| T139R | G190S | 0 | 2  | 71 | 0 | 0.00 | 0.00 | NA |
| T139R | G190E | 0 | 2  | 15 | 0 | 0.00 | 0.00 | NA |
| T139R | G190Q | 0 | 2  | 6  | 0 | 0.00 | 0.00 | NA |
| T139R | G190C | 0 | 2  | 3  | 0 | 0.00 | 0.00 | NA |
| T139R | H221Y | 0 | 2  | 39 | 0 | 0.00 | 0.00 | NA |
| T139R | K223T | 0 | 2  | 4  | 0 | 0.00 | 0.00 | NA |
| T139R | P225H | 0 | 2  | 81 | 0 | 0.00 | 0.00 | NA |
| T139R | F227L | 0 | 2  | 9  | 0 | 0.00 | 0.00 | NA |
| T139R | M230L | 0 | 2  | 26 | 0 | 0.00 | 0.00 | NA |
| T139R | Y232H | 0 | 2  | 6  | 0 | 0.00 | 0.00 | NA |
| T139R | D237E | 0 | 2  | 8  | 0 | 0.00 | 0.00 | NA |
| T139R | K238T | 0 | 2  | 29 | 0 | 0.00 | 0.00 | NA |

|       |       |   |    |    |   |      |      |    |
|-------|-------|---|----|----|---|------|------|----|
| T139R | K238N | 0 | 2  | 3  | 0 | 0.00 | 0.00 | NA |
| T139R | V241M | 0 | 2  | 2  | 0 | 0.00 | 0.00 | NA |
| T139R | Q242L | 0 | 2  | 2  | 0 | 0.00 | 0.00 | NA |
| T139R | Y318F | 0 | 2  | 2  | 0 | 0.00 | 0.00 | NA |
| V179D | V179T | 0 | 47 | 2  | 0 | 0.00 | 0.00 | NA |
| V179D | Y181I | 0 | 47 | 2  | 0 | 0.00 | 0.00 | NA |
| V179D | G190S | 0 | 47 | 71 | 0 | 0.03 | 0.00 | NA |
| V179D | G190E | 0 | 47 | 15 | 0 | 0.01 | 0.00 | NA |
| V179D | G190Q | 0 | 47 | 6  | 0 | 0.01 | 0.00 | NA |
| V179D | G190C | 0 | 47 | 3  | 0 | 0.00 | 0.00 | NA |
| V179D | K223T | 0 | 47 | 4  | 0 | 0.00 | 0.00 | NA |
| V179D | P225H | 0 | 46 | 80 | 0 | 0.03 | 0.00 | NA |
| V179D | Y232H | 0 | 47 | 6  | 0 | 0.01 | 0.00 | NA |
| V179D | D237E | 0 | 46 | 8  | 0 | 0.01 | 0.00 | NA |
| V179D | K238N | 0 | 47 | 3  | 0 | 0.00 | 0.00 | NA |
| V179D | V241M | 0 | 47 | 2  | 0 | 0.00 | 0.00 | NA |
| V179D | Q242L | 0 | 47 | 2  | 0 | 0.00 | 0.00 | NA |
| V179D | Y318F | 0 | 47 | 2  | 0 | 0.00 | 0.00 | NA |
| V179T | Y181C | 0 | 2  | 58 | 0 | 0.00 | 0.00 | NA |
| V179T | Y181I | 0 | 2  | 2  | 0 | 0.00 | 0.00 | NA |
| V179T | Y188L | 0 | 2  | 89 | 0 | 0.00 | 0.00 | NA |
| V179T | Y188C | 0 | 2  | 5  | 0 | 0.00 | 0.00 | NA |
| V179T | Y188H | 0 | 2  | 12 | 0 | 0.00 | 0.00 | NA |
| V179T | G190A | 0 | 2  | 76 | 0 | 0.00 | 0.00 | NA |
| V179T | G190S | 0 | 2  | 72 | 0 | 0.00 | 0.00 | NA |
| V179T | G190E | 0 | 2  | 15 | 0 | 0.00 | 0.00 | NA |
| V179T | G190Q | 0 | 2  | 6  | 0 | 0.00 | 0.00 | NA |
| V179T | G190C | 0 | 2  | 3  | 0 | 0.00 | 0.00 | NA |
| V179T | H221Y | 0 | 2  | 39 | 0 | 0.00 | 0.00 | NA |
| V179T | K223T | 0 | 2  | 4  | 0 | 0.00 | 0.00 | NA |
| V179T | P225H | 0 | 2  | 81 | 0 | 0.00 | 0.00 | NA |
| V179T | F227L | 0 | 2  | 9  | 0 | 0.00 | 0.00 | NA |
| V179T | M230L | 0 | 2  | 26 | 0 | 0.00 | 0.00 | NA |
| V179T | Y232H | 0 | 2  | 6  | 0 | 0.00 | 0.00 | NA |
| V179T | D237E | 0 | 2  | 8  | 0 | 0.00 | 0.00 | NA |
| V179T | K238T | 0 | 2  | 29 | 0 | 0.00 | 0.00 | NA |
| V179T | K238N | 0 | 2  | 3  | 0 | 0.00 | 0.00 | NA |
| V179T | V241M | 0 | 2  | 2  | 0 | 0.00 | 0.00 | NA |
| V179T | Q242L | 0 | 2  | 2  | 0 | 0.00 | 0.00 | NA |
| V179T | Y318F | 0 | 2  | 2  | 0 | 0.00 | 0.00 | NA |
| Y181C | Y181I | 0 | 58 | 2  | 0 | 0.00 | 0.00 | NA |
| Y181C | Y188C | 0 | 58 | 5  | 0 | 0.00 | 0.00 | NA |

|       |       |   |    |    |   |      |      |    |
|-------|-------|---|----|----|---|------|------|----|
| Y181C | Y188H | 0 | 58 | 12 | 0 | 0.01 | 0.00 | NA |
| Y181C | G190E | 0 | 58 | 15 | 0 | 0.01 | 0.00 | NA |
| Y181C | G190Q | 0 | 58 | 6  | 0 | 0.01 | 0.00 | NA |
| Y181C | G190C | 0 | 58 | 3  | 0 | 0.00 | 0.00 | NA |
| Y181C | K223T | 0 | 58 | 4  | 0 | 0.00 | 0.00 | NA |
| Y181C | F227L | 0 | 57 | 9  | 0 | 0.01 | 0.00 | NA |
| Y181C | Y232H | 0 | 58 | 6  | 0 | 0.01 | 0.00 | NA |
| Y181C | D237E | 0 | 58 | 8  | 0 | 0.01 | 0.00 | NA |
| Y181C | K238N | 0 | 58 | 3  | 0 | 0.00 | 0.00 | NA |
| Y181C | V241M | 0 | 58 | 2  | 0 | 0.00 | 0.00 | NA |
| Y181C | Y318F | 0 | 58 | 2  | 0 | 0.00 | 0.00 | NA |
| Y181I | Y188L | 0 | 2  | 89 | 0 | 0.00 | 0.00 | NA |
| Y181I | Y188C | 0 | 2  | 5  | 0 | 0.00 | 0.00 | NA |
| Y181I | Y188H | 0 | 2  | 12 | 0 | 0.00 | 0.00 | NA |
| Y181I | G190S | 0 | 2  | 72 | 0 | 0.00 | 0.00 | NA |
| Y181I | G190E | 0 | 2  | 15 | 0 | 0.00 | 0.00 | NA |
| Y181I | G190Q | 0 | 2  | 6  | 0 | 0.00 | 0.00 | NA |
| Y181I | G190C | 0 | 2  | 3  | 0 | 0.00 | 0.00 | NA |
| Y181I | H221Y | 0 | 2  | 39 | 0 | 0.00 | 0.00 | NA |
| Y181I | K223T | 0 | 2  | 4  | 0 | 0.00 | 0.00 | NA |
| Y181I | P225H | 0 | 2  | 81 | 0 | 0.00 | 0.00 | NA |
| Y181I | F227L | 0 | 2  | 9  | 0 | 0.00 | 0.00 | NA |
| Y181I | M230L | 0 | 2  | 26 | 0 | 0.00 | 0.00 | NA |
| Y181I | Y232H | 0 | 2  | 6  | 0 | 0.00 | 0.00 | NA |
| Y181I | K238T | 0 | 2  | 29 | 0 | 0.00 | 0.00 | NA |
| Y181I | K238N | 0 | 2  | 3  | 0 | 0.00 | 0.00 | NA |
| Y181I | V241M | 0 | 2  | 2  | 0 | 0.00 | 0.00 | NA |
| Y181I | Q242L | 0 | 2  | 2  | 0 | 0.00 | 0.00 | NA |
| Y181I | Y318F | 0 | 2  | 2  | 0 | 0.00 | 0.00 | NA |
| Y188L | Y188C | 0 | 89 | 5  | 0 | 0.00 | 0.00 | NA |
| Y188L | Y188H | 0 | 89 | 12 | 0 | 0.01 | 0.00 | NA |
| Y188L | G190S | 0 | 89 | 72 | 0 | 0.04 | 0.00 | NA |
| Y188L | G190E | 0 | 89 | 15 | 0 | 0.01 | 0.00 | NA |
| Y188L | G190Q | 0 | 89 | 6  | 0 | 0.01 | 0.00 | NA |
| Y188L | G190C | 0 | 89 | 3  | 0 | 0.00 | 0.00 | NA |
| Y188L | P225H | 0 | 88 | 81 | 0 | 0.04 | 0.00 | NA |
| Y188L | F227L | 0 | 89 | 9  | 0 | 0.01 | 0.00 | NA |
| Y188L | M230L | 0 | 89 | 26 | 0 | 0.02 | 0.00 | NA |
| Y188L | K238N | 0 | 89 | 3  | 0 | 0.00 | 0.00 | NA |
| Y188L | V241M | 0 | 89 | 2  | 0 | 0.00 | 0.00 | NA |
| Y188L | Q242L | 0 | 89 | 2  | 0 | 0.00 | 0.00 | NA |
| Y188C | Y188H | 0 | 5  | 12 | 0 | 0.00 | 0.00 | NA |



|       |       |   |    |    |   |      |      |    |
|-------|-------|---|----|----|---|------|------|----|
| Y188C | G190A | 0 | 5  | 76 | 0 | 0.00 | 0.00 | NA |
| Y188C | G190S | 0 | 5  | 72 | 0 | 0.00 | 0.00 | NA |
| Y188C | G190E | 0 | 5  | 15 | 0 | 0.00 | 0.00 | NA |
| Y188C | G190Q | 0 | 5  | 6  | 0 | 0.00 | 0.00 | NA |
| Y188C | G190C | 0 | 5  | 3  | 0 | 0.00 | 0.00 | NA |
| Y188C | H221Y | 0 | 5  | 39 | 0 | 0.00 | 0.00 | NA |
| Y188C | K223T | 0 | 5  | 4  | 0 | 0.00 | 0.00 | NA |
| Y188C | P225H | 0 | 5  | 81 | 0 | 0.00 | 0.00 | NA |
| Y188C | F227L | 0 | 5  | 9  | 0 | 0.00 | 0.00 | NA |
| Y188C | M230L | 0 | 5  | 26 | 0 | 0.00 | 0.00 | NA |
| Y188C | Y232H | 0 | 5  | 6  | 0 | 0.00 | 0.00 | NA |
| Y188C | D237E | 0 | 5  | 8  | 0 | 0.00 | 0.00 | NA |
| Y188C | K238T | 0 | 5  | 29 | 0 | 0.00 | 0.00 | NA |
| Y188C | K238N | 0 | 5  | 3  | 0 | 0.00 | 0.00 | NA |
| Y188C | V241M | 0 | 5  | 2  | 0 | 0.00 | 0.00 | NA |
| Y188C | Y318F | 0 | 5  | 2  | 0 | 0.00 | 0.00 | NA |
| Y188H | G190A | 0 | 12 | 76 | 0 | 0.01 | 0.00 | NA |
| Y188H | G190S | 0 | 12 | 72 | 0 | 0.01 | 0.00 | NA |
| Y188H | G190E | 0 | 12 | 15 | 0 | 0.01 | 0.00 | NA |
| Y188H | G190Q | 0 | 12 | 6  | 0 | 0.00 | 0.00 | NA |
| Y188H | G190C | 0 | 12 | 3  | 0 | 0.00 | 0.00 | NA |
| Y188H | K223T | 0 | 12 | 4  | 0 | 0.00 | 0.00 | NA |
| Y188H | P225H | 0 | 11 | 81 | 0 | 0.01 | 0.00 | NA |
| Y188H | F227L | 0 | 12 | 9  | 0 | 0.00 | 0.00 | NA |
| Y188H | M230L | 0 | 12 | 26 | 0 | 0.01 | 0.00 | NA |
| Y188H | Y232H | 0 | 12 | 6  | 0 | 0.00 | 0.00 | NA |
| Y188H | D237E | 0 | 12 | 8  | 0 | 0.00 | 0.00 | NA |
| Y188H | K238T | 0 | 12 | 29 | 0 | 0.01 | 0.00 | NA |
| Y188H | K238N | 0 | 11 | 3  | 0 | 0.00 | 0.00 | NA |
| Y188H | V241M | 0 | 12 | 2  | 0 | 0.00 | 0.00 | NA |
| Y188H | Q242L | 0 | 12 | 2  | 0 | 0.00 | 0.00 | NA |
| Y188H | Y318F | 0 | 12 | 2  | 0 | 0.00 | 0.00 | NA |
| G190A | G190S | 0 | 76 | 72 | 0 | 0.04 | 0.00 | NA |
| G190A | G190E | 0 | 76 | 15 | 0 | 0.01 | 0.00 | NA |
| G190A | G190Q | 0 | 76 | 6  | 0 | 0.00 | 0.00 | NA |
| G190A | G190C | 0 | 76 | 3  | 0 | 0.00 | 0.00 | NA |
| G190A | K223T | 0 | 76 | 4  | 0 | 0.00 | 0.00 | NA |
| G190A | P225H | 0 | 76 | 81 | 0 | 0.04 | 0.00 | NA |
| G190A | M230L | 0 | 76 | 26 | 0 | 0.02 | 0.00 | NA |
| G190A | K238N | 0 | 76 | 3  | 0 | 0.00 | 0.00 | NA |
| G190A | V241M | 0 | 76 | 2  | 0 | 0.00 | 0.00 | NA |
| G190A | Y318F | 0 | 76 | 2  | 0 | 0.00 | 0.00 | NA |

|       |       |   |    |    |   |      |      |    |
|-------|-------|---|----|----|---|------|------|----|
| G190S | G190E | 0 | 72 | 15 | 0 | 0.01 | 0.00 | NA |
| G190S | G190Q | 0 | 72 | 6  | 0 | 0.00 | 0.00 | NA |
| G190S | G190C | 0 | 72 | 3  | 0 | 0.00 | 0.00 | NA |
| G190S | K223T | 0 | 72 | 4  | 0 | 0.00 | 0.00 | NA |
| G190S | P225H | 0 | 72 | 81 | 0 | 0.04 | 0.00 | NA |
| G190S | F227L | 0 | 72 | 9  | 0 | 0.01 | 0.00 | NA |
| G190S | Y232H | 0 | 72 | 6  | 0 | 0.01 | 0.00 | NA |
| G190S | D237E | 0 | 72 | 8  | 0 | 0.01 | 0.00 | NA |
| G190S | K238N | 0 | 72 | 3  | 0 | 0.00 | 0.00 | NA |
| G190S | V241M | 0 | 72 | 2  | 0 | 0.00 | 0.00 | NA |
| G190S | Q242L | 0 | 72 | 2  | 0 | 0.00 | 0.00 | NA |
| G190S | Y318F | 0 | 72 | 2  | 0 | 0.00 | 0.00 | NA |
| G190E | G190Q | 0 | 15 | 6  | 0 | 0.00 | 0.00 | NA |
| G190E | G190C | 0 | 15 | 3  | 0 | 0.00 | 0.00 | NA |
| G190E | H221Y | 0 | 15 | 39 | 0 | 0.01 | 0.00 | NA |
| G190E | K223T | 0 | 15 | 4  | 0 | 0.00 | 0.00 | NA |
| G190E | P225H | 0 | 15 | 81 | 0 | 0.01 | 0.00 | NA |
| G190E | F227L | 0 | 15 | 9  | 0 | 0.01 | 0.00 | NA |
| G190E | M230L | 0 | 15 | 26 | 0 | 0.01 | 0.00 | NA |
| G190E | Y232H | 0 | 15 | 6  | 0 | 0.00 | 0.00 | NA |
| G190E | D237E | 0 | 15 | 8  | 0 | 0.00 | 0.00 | NA |
| G190E | K238T | 0 | 15 | 29 | 0 | 0.01 | 0.00 | NA |
| G190E | K238N | 0 | 15 | 3  | 0 | 0.00 | 0.00 | NA |
| G190E | V241M | 0 | 15 | 2  | 0 | 0.00 | 0.00 | NA |
| G190E | Q242L | 0 | 15 | 2  | 0 | 0.00 | 0.00 | NA |
| G190E | Y318F | 0 | 15 | 2  | 0 | 0.00 | 0.00 | NA |
| G190Q | G190C | 0 | 6  | 3  | 0 | 0.00 | 0.00 | NA |
| G190Q | H221Y | 0 | 6  | 39 | 0 | 0.00 | 0.00 | NA |
| G190Q | K223T | 0 | 6  | 4  | 0 | 0.00 | 0.00 | NA |
| G190Q | P225H | 0 | 6  | 81 | 0 | 0.01 | 0.00 | NA |
| G190Q | F227L | 0 | 6  | 9  | 0 | 0.00 | 0.00 | NA |
| G190Q | M230L | 0 | 6  | 26 | 0 | 0.00 | 0.00 | NA |
| G190Q | Y232H | 0 | 6  | 6  | 0 | 0.00 | 0.00 | NA |
| G190Q | D237E | 0 | 6  | 8  | 0 | 0.00 | 0.00 | NA |
| G190Q | K238T | 0 | 6  | 29 | 0 | 0.00 | 0.00 | NA |
| G190Q | K238N | 0 | 6  | 3  | 0 | 0.00 | 0.00 | NA |
| G190Q | V241M | 0 | 6  | 2  | 0 | 0.00 | 0.00 | NA |
| G190Q | Q242L | 0 | 6  | 2  | 0 | 0.00 | 0.00 | NA |
| G190Q | Y318F | 0 | 6  | 2  | 0 | 0.00 | 0.00 | NA |
| G190C | H221Y | 0 | 3  | 39 | 0 | 0.00 | 0.00 | NA |
| G190C | K223T | 0 | 3  | 4  | 0 | 0.00 | 0.00 | NA |
| G190C | P225H | 0 | 3  | 81 | 0 | 0.00 | 0.00 | NA |

|       |       |   |    |    |   |      |      |    |
|-------|-------|---|----|----|---|------|------|----|
| G190C | F227L | 0 | 3  | 9  | 0 | 0.00 | 0.00 | NA |
| G190C | M230L | 0 | 3  | 26 | 0 | 0.00 | 0.00 | NA |
| G190C | Y232H | 0 | 3  | 6  | 0 | 0.00 | 0.00 | NA |
| G190C | D237E | 0 | 3  | 8  | 0 | 0.00 | 0.00 | NA |
| G190C | K238T | 0 | 3  | 29 | 0 | 0.00 | 0.00 | NA |
| G190C | K238N | 0 | 3  | 3  | 0 | 0.00 | 0.00 | NA |
| G190C | V241M | 0 | 3  | 2  | 0 | 0.00 | 0.00 | NA |
| G190C | Q242L | 0 | 3  | 2  | 0 | 0.00 | 0.00 | NA |
| G190C | Y318F | 0 | 3  | 2  | 0 | 0.00 | 0.00 | NA |
| H221Y | K223T | 0 | 39 | 4  | 0 | 0.00 | 0.00 | NA |
| H221Y | P225H | 0 | 38 | 80 | 0 | 0.03 | 0.00 | NA |
| H221Y | F227L | 0 | 38 | 8  | 0 | 0.01 | 0.00 | NA |
| H221Y | Y232H | 0 | 39 | 6  | 0 | 0.01 | 0.00 | NA |
| H221Y | D237E | 0 | 38 | 8  | 0 | 0.01 | 0.00 | NA |
| H221Y | K238N | 0 | 39 | 3  | 0 | 0.00 | 0.00 | NA |
| H221Y | Q242L | 0 | 39 | 2  | 0 | 0.00 | 0.00 | NA |
| H221Y | Y318F | 0 | 39 | 2  | 0 | 0.00 | 0.00 | NA |
| K223T | P225H | 0 | 4  | 81 | 0 | 0.00 | 0.00 | NA |
| K223T | F227L | 0 | 4  | 9  | 0 | 0.00 | 0.00 | NA |
| K223T | M230L | 0 | 4  | 26 | 0 | 0.00 | 0.00 | NA |
| K223T | Y232H | 0 | 4  | 6  | 0 | 0.00 | 0.00 | NA |
| K223T | D237E | 0 | 4  | 8  | 0 | 0.00 | 0.00 | NA |
| K223T | K238N | 0 | 4  | 3  | 0 | 0.00 | 0.00 | NA |
| K223T | V241M | 0 | 4  | 2  | 0 | 0.00 | 0.00 | NA |
| K223T | Q242L | 0 | 4  | 2  | 0 | 0.00 | 0.00 | NA |
| K223T | Y318F | 0 | 4  | 2  | 0 | 0.00 | 0.00 | NA |
| P225H | F227L | 0 | 81 | 9  | 0 | 0.01 | 0.00 | NA |
| P225H | Y232H | 0 | 81 | 6  | 0 | 0.01 | 0.00 | NA |
| P225H | D237E | 0 | 81 | 8  | 0 | 0.01 | 0.00 | NA |
| P225H | K238N | 0 | 80 | 3  | 0 | 0.00 | 0.00 | NA |
| P225H | V241M | 0 | 80 | 2  | 0 | 0.00 | 0.00 | NA |
| P225H | Q242L | 0 | 81 | 2  | 0 | 0.00 | 0.00 | NA |
| F227L | M230L | 0 | 9  | 25 | 0 | 0.01 | 0.00 | NA |
| F227L | Y232H | 0 | 9  | 6  | 0 | 0.00 | 0.00 | NA |
| F227L | D237E | 0 | 9  | 8  | 0 | 0.00 | 0.00 | NA |
| F227L | K238N | 0 | 9  | 3  | 0 | 0.00 | 0.00 | NA |
| F227L | V241M | 0 | 9  | 2  | 0 | 0.00 | 0.00 | NA |
| F227L | Q242L | 0 | 9  | 2  | 0 | 0.00 | 0.00 | NA |
| F227L | Y318F | 0 | 9  | 2  | 0 | 0.00 | 0.00 | NA |
| M230L | Y232H | 0 | 26 | 6  | 0 | 0.00 | 0.00 | NA |
| M230L | K238N | 0 | 26 | 3  | 0 | 0.00 | 0.00 | NA |
| M230L | V241M | 0 | 26 | 2  | 0 | 0.00 | 0.00 | NA |

|       |       |   |    |    |   |      |      |    |
|-------|-------|---|----|----|---|------|------|----|
| M230L | Q242L | 0 | 26 | 2  | 0 | 0.00 | 0.00 | NA |
| M230L | Y318F | 0 | 26 | 2  | 0 | 0.00 | 0.00 | NA |
| Y232H | D237E | 0 | 6  | 8  | 0 | 0.00 | 0.00 | NA |
| Y232H | K238T | 0 | 6  | 29 | 0 | 0.00 | 0.00 | NA |
| Y232H | K238N | 0 | 6  | 3  | 0 | 0.00 | 0.00 | NA |
| Y232H | V241M | 0 | 6  | 2  | 0 | 0.00 | 0.00 | NA |
| Y232H | Q242L | 0 | 6  | 2  | 0 | 0.00 | 0.00 | NA |
| Y232H | Y318F | 0 | 6  | 2  | 0 | 0.00 | 0.00 | NA |
| D237E | K238T | 0 | 8  | 29 | 0 | 0.01 | 0.00 | NA |
| D237E | K238N | 0 | 8  | 3  | 0 | 0.00 | 0.00 | NA |
| D237E | V241M | 0 | 8  | 2  | 0 | 0.00 | 0.00 | NA |
| D237E | Q242L | 0 | 8  | 2  | 0 | 0.00 | 0.00 | NA |
| D237E | Y318F | 0 | 8  | 2  | 0 | 0.00 | 0.00 | NA |
| K238T | K238N | 0 | 29 | 3  | 0 | 0.00 | 0.00 | NA |
| K238T | Q242L | 0 | 28 | 2  | 0 | 0.00 | 0.00 | NA |
| K238T | Y318F | 0 | 29 | 2  | 0 | 0.00 | 0.00 | NA |
| K238N | V241M | 0 | 3  | 2  | 0 | 0.00 | 0.00 | NA |
| K238N | Q242L | 0 | 3  | 2  | 0 | 0.00 | 0.00 | NA |
| K238N | Y318F | 0 | 3  | 2  | 0 | 0.00 | 0.00 | NA |
| V241M | Q242L | 0 | 2  | 2  | 0 | 0.00 | 0.00 | NA |
| V241M | Y318F | 0 | 2  | 2  | 0 | 0.00 | 0.00 | NA |
| Q242L | Y318F | 0 | 2  | 2  | 0 | 0.00 | 0.00 | NA |

\* Occurrences in the dataset of 1,133 sequences from EFV-experienced patients. Each sequence contained at least 1 NNRTI-associated mutation; only 1 isolate per patient was included in the analysis and sequences with mixtures at a given position were excluded from comparisons at that position. XY: isolates containing both mutations; X only: isolates containing mutation X but not mutation Y; Y only: isolates containing mutation Y but not mutation X.

Bolded mutation pairs have significant positive covariances following correction for multiple comparisons at  $p < 0.05$ .

† J: Jaccard similarity coefficients;  $J_{\text{RAND}}$ : expected value of the Jaccard similarity coefficient assuming Mutation X and Mutation Y occur independently based on a permutation procedure described in Methods;  $J_{\text{SE}}$ : the standard error of J; Z:  $(J - J_{\text{RAND}}) / J_{\text{SE}}$ . A negative Z score indicates a negative correlation. Z scores marked NA indicate zero sequences with both mutations.

**Table S3.** Covariation between pairs of NNRTI-selected mutations, NVP-experienced subset

| Mut X        | Mut Y        | Occurrences* |            |            | Association† |                   |                 |             |                |
|--------------|--------------|--------------|------------|------------|--------------|-------------------|-----------------|-------------|----------------|
|              |              | XY           | X only     | Y only     | J            | J <sub>RAND</sub> | J <sub>SE</sub> | Z           | p              |
| K101E        | K103N        | 3            | 113        | 445        | 0.01         | 0.08              | 0.00            | -23.13      | 2.5E-118       |
| K103N        | G190A        | 19           | 420        | 271        | 0.03         | 0.16              | 0.01            | -21.93      | 1.5E-106       |
| Y181C        | Y188L        | 2            | 542        | 48         | 0.00         | 0.03              | 0.00            | -13.16      | 1.5E-39        |
| K103N        | Y188L        | 2            | 448        | 47         | 0.00         | 0.03              | 0.00            | -10.72      | 8.5E-27        |
| <b>K101E</b> | <b>G190A</b> | <b>85</b>    | <b>30</b>  | <b>200</b> | <b>0.27</b>  | <b>0.06</b>       | <b>0.03</b>     | <b>8.23</b> | <b>1.8E-16</b> |
| K103N        | V106I        | 1            | 448        | 25         | 0.00         | 0.02              | 0.00            | -7.99       | 1.3E-15        |
| V106A        | Y181C        | 4            | 42         | 540        | 0.01         | 0.03              | 0.00            | -7.53       | 4.9E-14        |
| Y181C        | K238T        | 2            | 541        | 28         | 0.00         | 0.02              | 0.00            | -7.29       | 3.2E-13        |
| K103N        | V106A        | 3            | 444        | 41         | 0.01         | 0.03              | 0.00            | -7.20       | 6.0E-13        |
| K103N        | Y181C        | 121          | 304        | 394        | 0.15         | 0.23              | 0.01            | -6.74       | 1.5E-11        |
| E138A        | Y181C        | 6            | 45         | 539        | 0.01         | 0.04              | 0.00            | -6.15       | 7.7E-10        |
| <b>V106A</b> | <b>F227L</b> | <b>21</b>    | <b>21</b>  | <b>7</b>   | <b>0.43</b>  | <b>0.01</b>       | <b>0.07</b>     | <b>5.77</b> | <b>7.8E-9</b>  |
| <b>Y181C</b> | <b>H221Y</b> | <b>87</b>    | <b>414</b> | <b>24</b>  | <b>0.17</b>  | <b>0.07</b>       | <b>0.02</b>     | <b>5.62</b> | <b>1.9E-8</b>  |
| Y181C        | F227L        | 3            | 540        | 25         | 0.01         | 0.02              | 0.00            | -4.88       | 1.1E-6         |
| K103N        | G190S        | 1            | 449        | 16         | 0.00         | 0.01              | 0.00            | -4.87       | 1.1E-6         |
| <b>V108I</b> | <b>H221Y</b> | <b>21</b>    | <b>38</b>  | <b>89</b>  | <b>0.14</b>  | <b>0.03</b>       | <b>0.03</b>     | <b>3.95</b> | <b>7.9E-5</b>  |
| E138Q        | Y181C        | 1            | 11         | 542        | 0.00         | 0.01              | 0.00            | -3.83       | 1.3E-4         |
| <b>V108I</b> | <b>Y181C</b> | <b>49</b>    | <b>14</b>  | <b>477</b> | <b>0.09</b>  | <b>0.04</b>       | <b>0.01</b>     | <b>3.78</b> | <b>1.5E-4</b>  |
| K103N        | F227L        | 3            | 445        | 24         | 0.01         | 0.02              | 0.00            | -3.65       | 2.6E-4         |
| K103N        | Y181I        | 3            | 445        | 24         | 0.01         | 0.02              | 0.00            | -3.61       | 3.1E-4         |
| <b>K103S</b> | <b>G190A</b> | <b>18</b>    | <b>3</b>   | <b>281</b> | <b>0.06</b>  | <b>0.01</b>       | <b>0.01</b>     | <b>3.31</b> | <b>9.2E-4</b>  |
| V90I         | Y181C        | 16           | 54         | 518        | 0.03         | 0.05              | 0.01            | -3.12       | 1.8E-3         |
| Y181C        | G190S        | 2            | 542        | 14         | 0.00         | 0.01              | 0.00            | -3.09       | 2.0E-3         |
| Y188L        | H221Y        | 1            | 48         | 112        | 0.01         | 0.03              | 0.01            | -3.03       | 2.5E-3         |
| K101E        | Y188L        | 1            | 116        | 48         | 0.01         | 0.02              | 0.01            | -3.00       | 2.7E-3         |
| A98G         | K103N        | 18           | 69         | 426        | 0.04         | 0.06              | 0.01            | -2.91       | 3.6E-3         |
| V106A        | G190A        | 4            | 40         | 298        | 0.01         | 0.03              | 0.01            | -2.91       | 3.7E-3         |
| K103N        | H221Y        | 27           | 411        | 84         | 0.05         | 0.07              | 0.01            | -2.39       | 0.02           |
| <b>K101E</b> | <b>G190S</b> | <b>7</b>     | <b>110</b> | <b>6</b>   | <b>0.06</b>  | <b>0.01</b>       | <b>0.02</b>     | <b>2.31</b> | <b>0.02</b>    |
| G190A        | M230L        | 1            | 302        | 14         | 0.00         | 0.01              | 0.00            | -2.25       | 0.02           |
| <b>K103N</b> | <b>K238T</b> | <b>20</b>    | <b>421</b> | <b>11</b>  | <b>0.04</b>  | <b>0.02</b>       | <b>0.01</b>     | <b>2.24</b> | <b>0.02</b>    |
| K103N        | E138A        | 10           | 437        | 39         | 0.02         | 0.03              | 0.01            | -2.20       | 0.03           |
| <b>K101H</b> | <b>G190A</b> | <b>8</b>     | <b>1</b>   | <b>289</b> | <b>0.03</b>  | <b>0.01</b>       | <b>0.01</b>     | <b>2.19</b> | <b>0.03</b>    |
| <b>K103N</b> | <b>E138Q</b> | <b>11</b>    | <b>438</b> | <b>1</b>   | <b>0.02</b>  | <b>0.01</b>       | <b>0.01</b>     | <b>2.12</b> | <b>0.03</b>    |
| K101H        | K103N        | 1            | 8          | 449        | 0.00         | 0.01              | 0.00            | -2.05       | 0.04           |
| A98G         | Y188L        | 1            | 90         | 47         | 0.01         | 0.02              | 0.01            | -2.01       | 0.04           |
| A98G         | G190A        | 28           | 60         | 270        | 0.08         | 0.05              | 0.01            | 1.90        | 0.06           |

|       |       |    |     |     |      |      |      |       |      |
|-------|-------|----|-----|-----|------|------|------|-------|------|
| V90I  | G190A | 10 | 63  | 290 | 0.03 | 0.04 | 0.01 | -1.88 | 0.06 |
| Y181C | K238N | 1  | 543 | 6   | 0.00 | 0.01 | 0.00 | -1.85 | 0.06 |
| K103N | V108I | 15 | 430 | 47  | 0.03 | 0.04 | 0.01 | -1.74 | 0.08 |
| V90I  | H221Y | 3  | 71  | 109 | 0.02 | 0.03 | 0.01 | -1.74 | 0.08 |
| V90I  | E138A | 1  | 74  | 51  | 0.01 | 0.02 | 0.01 | -1.69 | 0.09 |
| V106I | Y188L | 4  | 22  | 44  | 0.06 | 0.01 | 0.03 | 1.65  | 0.10 |
| I178F | G190A | 4  | 0   | 298 | 0.01 | 0.00 | 0.01 | 1.58  | 0.11 |
| E138A | Y181I | 4  | 48  | 23  | 0.05 | 0.01 | 0.03 | 1.55  | 0.12 |
| H221Y | K238T | 1  | 113 | 30  | 0.01 | 0.02 | 0.01 | -1.54 | 0.12 |
| T139R | Y181C | 12 | 5   | 531 | 0.02 | 0.01 | 0.01 | 1.54  | 0.12 |
| E138Q | G190A | 1  | 11  | 300 | 0.00 | 0.01 | 0.00 | -1.53 | 0.13 |
| K103N | Y181V | 2  | 448 | 10  | 0.00 | 0.01 | 0.00 | -1.50 | 0.13 |
| K101E | E138A | 8  | 108 | 41  | 0.05 | 0.02 | 0.02 | 1.49  | 0.14 |
| V106I | Y188C | 2  | 24  | 4   | 0.07 | 0.00 | 0.05 | 1.38  | 0.17 |
| V90I  | V106A | 1  | 73  | 44  | 0.01 | 0.02 | 0.01 | -1.31 | 0.19 |
| V106M | Y181C | 3  | 10  | 540 | 0.01 | 0.01 | 0.00 | -1.30 | 0.19 |
| V106M | V179D | 2  | 11  | 18  | 0.06 | 0.01 | 0.05 | 1.30  | 0.19 |
| V90I  | K101N | 2  | 73  | 2   | 0.03 | 0.00 | 0.02 | 1.27  | 0.20 |
| V108I | V241M | 2  | 62  | 3   | 0.03 | 0.00 | 0.02 | 1.26  | 0.21 |
| V108I | E138A | 1  | 63  | 50  | 0.01 | 0.02 | 0.01 | -1.26 | 0.21 |
| V106M | F227L | 2  | 11  | 26  | 0.05 | 0.01 | 0.04 | 1.25  | 0.21 |
| V108I | G190A | 10 | 53  | 290 | 0.03 | 0.04 | 0.01 | -1.25 | 0.21 |
| A98G  | V108I | 7  | 82  | 56  | 0.05 | 0.03 | 0.02 | 1.24  | 0.22 |
| F227L | M230L | 2  | 26  | 13  | 0.05 | 0.01 | 0.03 | 1.23  | 0.22 |
| K101E | F227L | 1  | 116 | 26  | 0.01 | 0.02 | 0.01 | -1.17 | 0.24 |
| V90I  | V108I | 6  | 68  | 57  | 0.05 | 0.02 | 0.02 | 1.17  | 0.24 |
| K101H | Y181C | 2  | 7   | 541 | 0.00 | 0.01 | 0.00 | -1.17 | 0.24 |
| V106A | H221Y | 2  | 43  | 112 | 0.01 | 0.02 | 0.01 | -1.13 | 0.26 |
| E138A | K238T | 3  | 48  | 28  | 0.04 | 0.01 | 0.02 | 1.12  | 0.26 |
| K101E | V108I | 8  | 107 | 54  | 0.05 | 0.03 | 0.02 | 1.10  | 0.27 |
| A98G  | K238T | 4  | 86  | 27  | 0.03 | 0.02 | 0.02 | 1.08  | 0.28 |
| V108I | F227L | 3  | 61  | 24  | 0.03 | 0.01 | 0.02 | 1.07  | 0.28 |
| Y181C | V241M | 4  | 539 | 1   | 0.01 | 0.00 | 0.00 | 1.02  | 0.31 |
| V106I | H221Y | 4  | 21  | 110 | 0.03 | 0.01 | 0.01 | 1.02  | 0.31 |
| K103N | K238N | 4  | 442 | 2   | 0.01 | 0.00 | 0.00 | 1.02  | 0.31 |
| K103N | D237E | 2  | 447 | 8   | 0.00 | 0.01 | 0.00 | -1.01 | 0.31 |
| K101E | V106I | 4  | 113 | 22  | 0.03 | 0.01 | 0.01 | 0.99  | 0.32 |
| V106M | G190A | 5  | 8   | 296 | 0.02 | 0.01 | 0.01 | 0.99  | 0.32 |
| V106I | P236L | 1  | 25  | 2   | 0.04 | 0.00 | 0.04 | 0.97  | 0.33 |
| K102N | G190A | 2  | 1   | 300 | 0.01 | 0.00 | 0.00 | 0.96  | 0.34 |
| V179D | Y188L | 2  | 18  | 48  | 0.03 | 0.01 | 0.02 | 0.96  | 0.34 |
| A98G  | D237E | 2  | 88  | 9   | 0.02 | 0.01 | 0.01 | 0.95  | 0.34 |

|       |       |    |     |     |      |      |      |       |      |
|-------|-------|----|-----|-----|------|------|------|-------|------|
| V179T | G190S | 1  | 1   | 16  | 0.06 | 0.00 | 0.06 | 0.95  | 0.34 |
| L100I | K103N | 2  | 0   | 448 | 0.00 | 0.00 | 0.00 | 0.94  | 0.35 |
| K103T | M230L | 1  | 2   | 14  | 0.06 | 0.00 | 0.06 | 0.94  | 0.35 |
| K103T | K238N | 1  | 2   | 6   | 0.11 | 0.00 | 0.12 | 0.93  | 0.35 |
| D237E | K238N | 1  | 10  | 5   | 0.06 | 0.00 | 0.06 | 0.93  | 0.35 |
| V106M | Y188C | 1  | 11  | 5   | 0.06 | 0.00 | 0.06 | 0.93  | 0.35 |
| V106A | Y232H | 1  | 45  | 1   | 0.02 | 0.00 | 0.02 | 0.93  | 0.35 |
| K238N | V241M | 1  | 6   | 4   | 0.09 | 0.00 | 0.10 | 0.92  | 0.36 |
| K103T | K238T | 1  | 2   | 30  | 0.03 | 0.00 | 0.03 | 0.92  | 0.36 |
| P236L | K238T | 1  | 2   | 30  | 0.03 | 0.00 | 0.03 | 0.92  | 0.36 |
| P225H | K238T | 1  | 4   | 30  | 0.03 | 0.00 | 0.03 | 0.90  | 0.37 |
| P225H | F227L | 1  | 4   | 27  | 0.03 | 0.00 | 0.03 | 0.90  | 0.37 |
| A98G  | Y181V | 2  | 89  | 10  | 0.02 | 0.01 | 0.01 | 0.89  | 0.37 |
| G190A | H221Y | 21 | 278 | 91  | 0.05 | 0.06 | 0.01 | -0.89 | 0.38 |
| E138A | H221Y | 6  | 43  | 108 | 0.04 | 0.02 | 0.02 | 0.89  | 0.38 |
| K101H | T139R | 1  | 8   | 16  | 0.04 | 0.00 | 0.04 | 0.87  | 0.38 |
| V106M | M230L | 1  | 12  | 14  | 0.04 | 0.00 | 0.04 | 0.87  | 0.39 |
| V179T | Y181C | 2  | 0   | 540 | 0.00 | 0.00 | 0.00 | 0.86  | 0.39 |
| A98G  | Y181C | 39 | 47  | 499 | 0.07 | 0.06 | 0.01 | 0.84  | 0.40 |
| E138Q | M230L | 1  | 11  | 14  | 0.04 | 0.01 | 0.04 | 0.84  | 0.40 |
| V106A | P225H | 1  | 45  | 4   | 0.02 | 0.00 | 0.02 | 0.84  | 0.40 |
| A98G  | P236L | 1  | 90  | 2   | 0.01 | 0.00 | 0.01 | 0.83  | 0.41 |
| K103S | V106M | 1  | 20  | 11  | 0.03 | 0.01 | 0.03 | 0.82  | 0.41 |
| E138A | Y188L | 1  | 51  | 49  | 0.01 | 0.02 | 0.01 | -0.82 | 0.41 |
| K101H | Y181I | 1  | 8   | 27  | 0.03 | 0.00 | 0.03 | 0.82  | 0.41 |
| I94L  | V108I | 1  | 3   | 63  | 0.01 | 0.00 | 0.02 | 0.82  | 0.41 |
| A98G  | F227L | 1  | 90  | 27  | 0.01 | 0.02 | 0.01 | -0.79 | 0.43 |
| V179D | M230L | 1  | 19  | 14  | 0.03 | 0.01 | 0.03 | 0.79  | 0.43 |
| Y181C | D237E | 3  | 540 | 8   | 0.01 | 0.01 | 0.00 | -0.78 | 0.43 |
| V179D | G190A | 3  | 17  | 300 | 0.01 | 0.01 | 0.01 | -0.78 | 0.44 |
| V90I  | I94L  | 1  | 74  | 3   | 0.01 | 0.00 | 0.01 | 0.77  | 0.44 |
| K101E | P236L | 1  | 116 | 2   | 0.01 | 0.00 | 0.01 | 0.76  | 0.45 |
| F227L | D237E | 1  | 27  | 10  | 0.03 | 0.01 | 0.03 | 0.76  | 0.45 |
| H221Y | P236L | 1  | 113 | 2   | 0.01 | 0.00 | 0.01 | 0.75  | 0.45 |
| Y181V | H221Y | 2  | 10  | 112 | 0.02 | 0.01 | 0.01 | 0.74  | 0.46 |
| V90I  | P225H | 1  | 74  | 4   | 0.01 | 0.00 | 0.01 | 0.74  | 0.46 |
| A98G  | K101N | 1  | 89  | 3   | 0.01 | 0.00 | 0.01 | 0.74  | 0.46 |
| K103N | P225H | 3  | 446 | 2   | 0.01 | 0.00 | 0.00 | 0.74  | 0.46 |
| V108I | K238N | 1  | 63  | 6   | 0.01 | 0.00 | 0.01 | 0.71  | 0.48 |
| M230L | K238T | 1  | 14  | 30  | 0.02 | 0.01 | 0.02 | 0.70  | 0.49 |
| I178F | H221Y | 1  | 3   | 113 | 0.01 | 0.00 | 0.01 | 0.69  | 0.49 |
| K101E | I178F | 1  | 116 | 3   | 0.01 | 0.00 | 0.01 | 0.69  | 0.49 |

|       |       |   |     |     |      |      |      |       |      |
|-------|-------|---|-----|-----|------|------|------|-------|------|
| A98G  | P225H | 1 | 90  | 4   | 0.01 | 0.00 | 0.01 | 0.68  | 0.50 |
| K103N | V241M | 1 | 449 | 4   | 0.00 | 0.00 | 0.00 | -0.67 | 0.50 |
| V106M | H221Y | 2 | 11  | 112 | 0.02 | 0.01 | 0.01 | 0.67  | 0.50 |
| I94L  | K101E | 1 | 3   | 115 | 0.01 | 0.00 | 0.01 | 0.66  | 0.51 |
| A98G  | V106I | 1 | 90  | 25  | 0.01 | 0.01 | 0.01 | -0.65 | 0.51 |
| T139R | K238T | 1 | 16  | 30  | 0.02 | 0.01 | 0.02 | 0.65  | 0.52 |
| I178F | Y181C | 1 | 3   | 544 | 0.00 | 0.00 | 0.00 | -0.64 | 0.52 |
| V90I  | K238N | 1 | 74  | 6   | 0.01 | 0.00 | 0.01 | 0.63  | 0.53 |
| G190S | K238T | 1 | 16  | 30  | 0.02 | 0.01 | 0.02 | 0.63  | 0.53 |
| V106A | D237E | 1 | 45  | 10  | 0.02 | 0.01 | 0.02 | 0.63  | 0.53 |
| V179D | Y181I | 1 | 19  | 27  | 0.02 | 0.01 | 0.02 | 0.61  | 0.54 |
| H221Y | V241M | 1 | 112 | 4   | 0.01 | 0.00 | 0.01 | 0.61  | 0.54 |
| K101N | Y181C | 2 | 1   | 540 | 0.00 | 0.00 | 0.00 | 0.59  | 0.55 |
| K101E | P225H | 1 | 116 | 4   | 0.01 | 0.00 | 0.01 | 0.59  | 0.55 |
| V179T | G190A | 1 | 1   | 302 | 0.00 | 0.00 | 0.00 | 0.58  | 0.56 |
| K102N | Y181C | 2 | 1   | 542 | 0.00 | 0.00 | 0.00 | 0.58  | 0.56 |
| Y188C | H221Y | 1 | 4   | 113 | 0.01 | 0.00 | 0.01 | 0.57  | 0.57 |
| G190A | Y232H | 1 | 302 | 1   | 0.00 | 0.00 | 0.00 | 0.57  | 0.57 |
| V179D | K238T | 1 | 19  | 30  | 0.02 | 0.01 | 0.02 | 0.56  | 0.57 |
| V179D | H221Y | 1 | 18  | 113 | 0.01 | 0.01 | 0.01 | -0.54 | 0.59 |
| V106A | M230L | 1 | 45  | 14  | 0.02 | 0.01 | 0.02 | 0.52  | 0.60 |
| V90I  | K101E | 5 | 70  | 111 | 0.03 | 0.03 | 0.01 | -0.52 | 0.61 |
| A98G  | K103S | 2 | 88  | 19  | 0.02 | 0.01 | 0.01 | 0.51  | 0.61 |
| V106I | Y181I | 1 | 25  | 27  | 0.02 | 0.01 | 0.02 | 0.50  | 0.62 |
| V90I  | Y181V | 1 | 74  | 9   | 0.01 | 0.01 | 0.01 | 0.50  | 0.62 |
| V90I  | D237E | 1 | 74  | 10  | 0.01 | 0.01 | 0.01 | 0.44  | 0.66 |
| K101E | H221Y | 8 | 107 | 103 | 0.04 | 0.04 | 0.01 | -0.43 | 0.67 |
| H221Y | F227L | 3 | 111 | 25  | 0.02 | 0.02 | 0.01 | 0.43  | 0.67 |
| V90I  | Y181I | 2 | 72  | 26  | 0.02 | 0.01 | 0.01 | 0.41  | 0.68 |
| F227L | K238T | 1 | 27  | 30  | 0.02 | 0.01 | 0.02 | 0.41  | 0.68 |
| T139R | G190A | 3 | 14  | 299 | 0.01 | 0.01 | 0.01 | -0.41 | 0.68 |
| E138A | G190S | 1 | 51  | 16  | 0.01 | 0.01 | 0.01 | 0.40  | 0.69 |
| V90I  | A98G  | 4 | 71  | 87  | 0.02 | 0.03 | 0.01 | -0.38 | 0.70 |
| G190A | F227L | 5 | 297 | 22  | 0.02 | 0.02 | 0.01 | -0.38 | 0.71 |
| V179D | Y181C | 9 | 11  | 535 | 0.02 | 0.01 | 0.01 | 0.37  | 0.71 |
| T139R | H221Y | 1 | 16  | 113 | 0.01 | 0.01 | 0.01 | -0.37 | 0.71 |
| G190A | P236L | 1 | 302 | 2   | 0.00 | 0.00 | 0.00 | 0.36  | 0.72 |
| V90I  | F227L | 1 | 74  | 26  | 0.01 | 0.01 | 0.01 | -0.36 | 0.72 |
| K103N | Y232H | 1 | 449 | 1   | 0.00 | 0.00 | 0.00 | 0.34  | 0.73 |
| V108I | K238T | 1 | 63  | 30  | 0.01 | 0.01 | 0.01 | -0.34 | 0.73 |
| V108I | M230L | 1 | 63  | 14  | 0.01 | 0.01 | 0.01 | 0.34  | 0.73 |
| V90I  | V106M | 1 | 74  | 12  | 0.01 | 0.01 | 0.01 | 0.34  | 0.74 |



|       |       |     |     |     |      |      |      |       |      |
|-------|-------|-----|-----|-----|------|------|------|-------|------|
| K103N | T139R | 5   | 440 | 12  | 0.01 | 0.01 | 0.00 | -0.32 | 0.75 |
| E138A | G190A | 10  | 41  | 292 | 0.03 | 0.03 | 0.01 | -0.32 | 0.75 |
| I94L  | Y181C | 2   | 2   | 543 | 0.00 | 0.00 | 0.00 | 0.31  | 0.76 |
| K101E | K238T | 2   | 114 | 28  | 0.01 | 0.02 | 0.01 | -0.30 | 0.76 |
| V106I | Y181C | 9   | 16  | 532 | 0.02 | 0.02 | 0.01 | -0.30 | 0.76 |
| V90I  | V106I | 1   | 73  | 24  | 0.01 | 0.01 | 0.01 | -0.30 | 0.77 |
| V108I | G190S | 1   | 63  | 15  | 0.01 | 0.01 | 0.01 | 0.29  | 0.77 |
| V106I | G190A | 5   | 21  | 297 | 0.02 | 0.02 | 0.01 | -0.29 | 0.77 |
| E138A | V179D | 1   | 51  | 19  | 0.01 | 0.01 | 0.01 | 0.28  | 0.78 |
| A98G  | H221Y | 8   | 83  | 105 | 0.04 | 0.04 | 0.01 | 0.28  | 0.78 |
| V90I  | K238T | 2   | 71  | 29  | 0.02 | 0.02 | 0.01 | 0.28  | 0.78 |
| K101E | Y181C | 47  | 66  | 487 | 0.08 | 0.08 | 0.01 | 0.26  | 0.79 |
| A98G  | K101E | 8   | 82  | 109 | 0.04 | 0.04 | 0.01 | 0.26  | 0.79 |
| G190A | K238T | 6   | 294 | 25  | 0.02 | 0.02 | 0.01 | -0.26 | 0.80 |
| V90I  | Y188L | 3   | 72  | 47  | 0.02 | 0.02 | 0.01 | 0.26  | 0.80 |
| V90I  | M230L | 1   | 74  | 14  | 0.01 | 0.01 | 0.01 | 0.25  | 0.80 |
| Y181C | P236L | 1   | 544 | 2   | 0.00 | 0.00 | 0.00 | -0.23 | 0.82 |
| V90I  | K103N | 25  | 46  | 417 | 0.05 | 0.05 | 0.01 | 0.20  | 0.84 |
| K103T | Y181C | 1   | 2   | 543 | 0.00 | 0.00 | 0.00 | -0.19 | 0.85 |
| Y181C | Y318F | 1   | 544 | 1   | 0.00 | 0.00 | 0.00 | 0.18  | 0.86 |
| V90I  | T139R | 1   | 72  | 16  | 0.01 | 0.01 | 0.01 | 0.17  | 0.86 |
| H221Y | M230L | 1   | 113 | 13  | 0.01 | 0.01 | 0.01 | -0.14 | 0.89 |
| V108I | Y181I | 1   | 63  | 25  | 0.01 | 0.01 | 0.01 | -0.14 | 0.89 |
| V108I | V179D | 1   | 63  | 19  | 0.01 | 0.01 | 0.01 | 0.12  | 0.90 |
| V90I  | G190S | 1   | 74  | 16  | 0.01 | 0.01 | 0.01 | 0.11  | 0.91 |
| V106I | V108I | 1   | 24  | 63  | 0.01 | 0.01 | 0.01 | -0.11 | 0.91 |
| G190A | D237E | 2   | 298 | 8   | 0.01 | 0.01 | 0.00 | -0.11 | 0.91 |
| A98G  | E138A | 3   | 88  | 48  | 0.02 | 0.02 | 0.01 | -0.10 | 0.92 |
| Y181I | H221Y | 2   | 25  | 112 | 0.01 | 0.02 | 0.01 | -0.10 | 0.92 |
| G190A | P225H | 1   | 302 | 4   | 0.00 | 0.00 | 0.00 | -0.08 | 0.93 |
| K101E | E138Q | 1   | 115 | 11  | 0.01 | 0.01 | 0.01 | 0.06  | 0.95 |
| A98G  | M230L | 1   | 90  | 14  | 0.01 | 0.01 | 0.01 | 0.06  | 0.95 |
| Y181C | G190A | 120 | 407 | 177 | 0.17 | 0.17 | 0.01 | 0.06  | 0.95 |
| A98G  | T139R | 1   | 90  | 16  | 0.01 | 0.01 | 0.01 | -0.04 | 0.96 |
| K103N | P236L | 1   | 449 | 2   | 0.00 | 0.00 | 0.00 | -0.04 | 0.97 |
| K103N | M230L | 5   | 444 | 10  | 0.01 | 0.01 | 0.00 | -0.04 | 0.97 |
| V90I  | V179D | 1   | 73  | 19  | 0.01 | 0.01 | 0.01 | -0.04 | 0.97 |
| K101E | Y181V | 1   | 115 | 11  | 0.01 | 0.01 | 0.01 | 0.03  | 0.98 |
| Y181C | M230L | 6   | 539 | 9   | 0.01 | 0.01 | 0.00 | -0.03 | 0.98 |
| V106A | V108I | 2   | 43  | 62  | 0.02 | 0.02 | 0.01 | -0.02 | 0.98 |
| E138A | F227L | 1   | 51  | 27  | 0.01 | 0.01 | 0.01 | 0.01  | 0.99 |
| K102N | K103N | 1   | 2   | 449 | 0.00 | 0.00 | 0.00 | -0.01 | 0.99 |

|       |       |   |    |     |      |      |      |      |      |
|-------|-------|---|----|-----|------|------|------|------|------|
| V106A | K238T | 1 | 45 | 30  | 0.01 | 0.01 | 0.01 | 0.00 | 1.00 |
| V90I  | L100I | 0 | 75 | 2   | 0.00 | 0.00 | 0.00 | NA   |      |
| V90I  | K101H | 0 | 75 | 9   | 0.00 | 0.01 | 0.00 | NA   |      |
| V90I  | K102N | 0 | 75 | 3   | 0.00 | 0.00 | 0.00 | NA   |      |
| V90I  | K103S | 0 | 75 | 21  | 0.00 | 0.01 | 0.00 | NA   |      |
| V90I  | K103T | 0 | 75 | 3   | 0.00 | 0.00 | 0.00 | NA   |      |
| V90I  | E138Q | 0 | 75 | 12  | 0.00 | 0.01 | 0.00 | NA   |      |
| V90I  | I178F | 0 | 75 | 4   | 0.00 | 0.00 | 0.00 | NA   |      |
| V90I  | V179T | 0 | 75 | 2   | 0.00 | 0.00 | 0.00 | NA   |      |
| V90I  | Y188C | 0 | 75 | 6   | 0.00 | 0.00 | 0.00 | NA   |      |
| V90I  | Y232H | 0 | 75 | 2   | 0.00 | 0.00 | 0.00 | NA   |      |
| V90I  | P236L | 0 | 75 | 3   | 0.00 | 0.00 | 0.00 | NA   |      |
| V90I  | V241M | 0 | 75 | 5   | 0.00 | 0.00 | 0.00 | NA   |      |
| V90I  | Y318F | 0 | 75 | 2   | 0.00 | 0.00 | 0.00 | NA   |      |
| I94L  | A98G  | 0 | 4  | 90  | 0.00 | 0.00 | 0.00 | NA   |      |
| I94L  | L100I | 0 | 4  | 2   | 0.00 | 0.00 | 0.00 | NA   |      |
| I94L  | K101H | 0 | 4  | 9   | 0.00 | 0.00 | 0.00 | NA   |      |
| I94L  | K101N | 0 | 4  | 4   | 0.00 | 0.00 | 0.00 | NA   |      |
| I94L  | K102N | 0 | 4  | 3   | 0.00 | 0.00 | 0.00 | NA   |      |
| I94L  | K103N | 0 | 3  | 450 | 0.00 | 0.00 | 0.00 | NA   |      |
| I94L  | K103S | 0 | 4  | 21  | 0.00 | 0.00 | 0.00 | NA   |      |
| I94L  | K103T | 0 | 4  | 3   | 0.00 | 0.00 | 0.00 | NA   |      |
| I94L  | V106A | 0 | 4  | 46  | 0.00 | 0.00 | 0.00 | NA   |      |
| I94L  | V106I | 0 | 4  | 26  | 0.00 | 0.00 | 0.00 | NA   |      |
| I94L  | V106M | 0 | 4  | 13  | 0.00 | 0.00 | 0.00 | NA   |      |
| I94L  | E138Q | 0 | 4  | 12  | 0.00 | 0.00 | 0.00 | NA   |      |
| I94L  | E138A | 0 | 4  | 52  | 0.00 | 0.00 | 0.00 | NA   |      |
| I94L  | T139R | 0 | 4  | 17  | 0.00 | 0.00 | 0.00 | NA   |      |
| I94L  | I178F | 0 | 4  | 4   | 0.00 | 0.00 | 0.00 | NA   |      |
| I94L  | V179D | 0 | 4  | 20  | 0.00 | 0.00 | 0.00 | NA   |      |
| I94L  | V179T | 0 | 4  | 2   | 0.00 | 0.00 | 0.00 | NA   |      |
| I94L  | Y181I | 0 | 4  | 28  | 0.00 | 0.00 | 0.00 | NA   |      |
| I94L  | Y181V | 0 | 4  | 12  | 0.00 | 0.00 | 0.00 | NA   |      |
| I94L  | Y188L | 0 | 4  | 50  | 0.00 | 0.00 | 0.00 | NA   |      |
| I94L  | Y188C | 0 | 4  | 6   | 0.00 | 0.00 | 0.00 | NA   |      |
| I94L  | G190A | 0 | 4  | 302 | 0.00 | 0.00 | 0.00 | NA   |      |
| I94L  | G190S | 0 | 4  | 17  | 0.00 | 0.00 | 0.00 | NA   |      |
| I94L  | H221Y | 0 | 4  | 114 | 0.00 | 0.00 | 0.00 | NA   |      |
| I94L  | P225H | 0 | 4  | 4   | 0.00 | 0.00 | 0.00 | NA   |      |
| I94L  | F227L | 0 | 4  | 28  | 0.00 | 0.00 | 0.00 | NA   |      |
| I94L  | M230L | 0 | 4  | 15  | 0.00 | 0.00 | 0.00 | NA   |      |
| I94L  | Y232H | 0 | 4  | 2   | 0.00 | 0.00 | 0.00 | NA   |      |

|       |       |   |    |     |      |      |      |    |
|-------|-------|---|----|-----|------|------|------|----|
| I94L  | P236L | 0 | 4  | 3   | 0.00 | 0.00 | 0.00 | NA |
| I94L  | D237E | 0 | 4  | 11  | 0.00 | 0.00 | 0.00 | NA |
| I94L  | K238T | 0 | 4  | 31  | 0.00 | 0.00 | 0.00 | NA |
| I94L  | K238N | 0 | 4  | 7   | 0.00 | 0.00 | 0.00 | NA |
| I94L  | V241M | 0 | 4  | 5   | 0.00 | 0.00 | 0.00 | NA |
| I94L  | Y318F | 0 | 4  | 2   | 0.00 | 0.00 | 0.00 | NA |
| A98G  | L100I | 0 | 91 | 2   | 0.00 | 0.00 | 0.00 | NA |
| A98G  | K101H | 0 | 91 | 9   | 0.00 | 0.01 | 0.00 | NA |
| A98G  | K102N | 0 | 91 | 3   | 0.00 | 0.00 | 0.00 | NA |
| A98G  | K103T | 0 | 91 | 3   | 0.00 | 0.00 | 0.00 | NA |
| A98G  | V106A | 0 | 90 | 46  | 0.00 | 0.02 | 0.00 | NA |
| A98G  | V106M | 0 | 91 | 13  | 0.00 | 0.01 | 0.00 | NA |
| A98G  | E138Q | 0 | 91 | 12  | 0.00 | 0.01 | 0.00 | NA |
| A98G  | I178F | 0 | 91 | 4   | 0.00 | 0.00 | 0.00 | NA |
| A98G  | V179D | 0 | 91 | 20  | 0.00 | 0.01 | 0.00 | NA |
| A98G  | V179T | 0 | 91 | 2   | 0.00 | 0.00 | 0.00 | NA |
| A98G  | Y181I | 0 | 90 | 28  | 0.00 | 0.01 | 0.00 | NA |
| A98G  | Y188C | 0 | 91 | 6   | 0.00 | 0.00 | 0.00 | NA |
| A98G  | G190S | 0 | 91 | 17  | 0.00 | 0.01 | 0.00 | NA |
| A98G  | Y232H | 0 | 91 | 2   | 0.00 | 0.00 | 0.00 | NA |
| A98G  | K238N | 0 | 91 | 7   | 0.00 | 0.00 | 0.00 | NA |
| A98G  | V241M | 0 | 91 | 5   | 0.00 | 0.00 | 0.00 | NA |
| A98G  | Y318F | 0 | 91 | 2   | 0.00 | 0.00 | 0.00 | NA |
| L100I | K101E | 0 | 2  | 117 | 0.00 | 0.00 | 0.00 | NA |
| L100I | K101H | 0 | 2  | 9   | 0.00 | 0.00 | 0.00 | NA |
| L100I | K101N | 0 | 2  | 4   | 0.00 | 0.00 | 0.00 | NA |
| L100I | K102N | 0 | 2  | 3   | 0.00 | 0.00 | 0.00 | NA |
| L100I | K103S | 0 | 2  | 21  | 0.00 | 0.00 | 0.00 | NA |
| L100I | K103T | 0 | 2  | 3   | 0.00 | 0.00 | 0.00 | NA |
| L100I | V106A | 0 | 2  | 46  | 0.00 | 0.00 | 0.00 | NA |
| L100I | V106I | 0 | 2  | 26  | 0.00 | 0.00 | 0.00 | NA |
| L100I | V106M | 0 | 2  | 13  | 0.00 | 0.00 | 0.00 | NA |
| L100I | V108I | 0 | 2  | 64  | 0.00 | 0.00 | 0.00 | NA |
| L100I | E138Q | 0 | 2  | 12  | 0.00 | 0.00 | 0.00 | NA |
| L100I | E138A | 0 | 2  | 52  | 0.00 | 0.00 | 0.00 | NA |
| L100I | T139R | 0 | 2  | 17  | 0.00 | 0.00 | 0.00 | NA |
| L100I | I178F | 0 | 2  | 4   | 0.00 | 0.00 | 0.00 | NA |
| L100I | V179D | 0 | 2  | 20  | 0.00 | 0.00 | 0.00 | NA |
| L100I | V179T | 0 | 2  | 2   | 0.00 | 0.00 | 0.00 | NA |
| L100I | Y181C | 0 | 2  | 545 | 0.00 | 0.00 | 0.00 | NA |
| L100I | Y181I | 0 | 2  | 28  | 0.00 | 0.00 | 0.00 | NA |
| L100I | Y181V | 0 | 2  | 12  | 0.00 | 0.00 | 0.00 | NA |

|       |       |   |     |     |      |      |      |    |
|-------|-------|---|-----|-----|------|------|------|----|
| L100I | Y188L | 0 | 2   | 50  | 0.00 | 0.00 | 0.00 | NA |
| L100I | Y188C | 0 | 2   | 6   | 0.00 | 0.00 | 0.00 | NA |
| L100I | G190A | 0 | 2   | 303 | 0.00 | 0.00 | 0.00 | NA |
| L100I | G190S | 0 | 2   | 17  | 0.00 | 0.00 | 0.00 | NA |
| L100I | H221Y | 0 | 2   | 114 | 0.00 | 0.00 | 0.00 | NA |
| L100I | P225H | 0 | 2   | 5   | 0.00 | 0.00 | 0.00 | NA |
| L100I | F227L | 0 | 2   | 28  | 0.00 | 0.00 | 0.00 | NA |
| L100I | M230L | 0 | 2   | 15  | 0.00 | 0.00 | 0.00 | NA |
| L100I | Y232H | 0 | 2   | 2   | 0.00 | 0.00 | 0.00 | NA |
| L100I | P236L | 0 | 2   | 3   | 0.00 | 0.00 | 0.00 | NA |
| L100I | D237E | 0 | 2   | 11  | 0.00 | 0.00 | 0.00 | NA |
| L100I | K238T | 0 | 2   | 31  | 0.00 | 0.00 | 0.00 | NA |
| L100I | K238N | 0 | 2   | 7   | 0.00 | 0.00 | 0.00 | NA |
| L100I | V241M | 0 | 2   | 5   | 0.00 | 0.00 | 0.00 | NA |
| L100I | Y318F | 0 | 2   | 2   | 0.00 | 0.00 | 0.00 | NA |
| K101E | K101H | 0 | 117 | 9   | 0.00 | 0.01 | 0.00 | NA |
| K101E | K101N | 0 | 117 | 4   | 0.00 | 0.00 | 0.00 | NA |
| K101E | K102N | 0 | 117 | 3   | 0.00 | 0.00 | 0.00 | NA |
| K101E | K103S | 0 | 117 | 21  | 0.00 | 0.01 | 0.00 | NA |
| K101E | K103T | 0 | 117 | 3   | 0.00 | 0.00 | 0.00 | NA |
| K101E | V106A | 0 | 117 | 44  | 0.00 | 0.02 | 0.00 | NA |
| K101E | V106M | 0 | 117 | 13  | 0.00 | 0.01 | 0.00 | NA |
| K101E | T139R | 0 | 117 | 17  | 0.00 | 0.01 | 0.00 | NA |
| K101E | V179D | 0 | 117 | 20  | 0.00 | 0.01 | 0.00 | NA |
| K101E | V179T | 0 | 117 | 2   | 0.00 | 0.00 | 0.00 | NA |
| K101E | Y181I | 0 | 117 | 28  | 0.00 | 0.02 | 0.00 | NA |
| K101E | Y188C | 0 | 117 | 6   | 0.00 | 0.00 | 0.00 | NA |
| K101E | M230L | 0 | 117 | 14  | 0.00 | 0.01 | 0.00 | NA |
| K101E | Y232H | 0 | 117 | 2   | 0.00 | 0.00 | 0.00 | NA |
| K101E | D237E | 0 | 117 | 11  | 0.00 | 0.01 | 0.00 | NA |
| K101E | K238N | 0 | 117 | 7   | 0.00 | 0.00 | 0.00 | NA |
| K101E | V241M | 0 | 117 | 5   | 0.00 | 0.00 | 0.00 | NA |
| K101E | Y318F | 0 | 117 | 2   | 0.00 | 0.00 | 0.00 | NA |
| K101H | K101N | 0 | 9   | 4   | 0.00 | 0.00 | 0.00 | NA |
| K101H | K102N | 0 | 9   | 3   | 0.00 | 0.00 | 0.00 | NA |
| K101H | K103S | 0 | 9   | 21  | 0.00 | 0.00 | 0.00 | NA |
| K101H | K103T | 0 | 9   | 3   | 0.00 | 0.00 | 0.00 | NA |
| K101H | V106A | 0 | 9   | 46  | 0.00 | 0.01 | 0.00 | NA |
| K101H | V106I | 0 | 9   | 26  | 0.00 | 0.00 | 0.00 | NA |
| K101H | V106M | 0 | 9   | 12  | 0.00 | 0.00 | 0.00 | NA |
| K101H | V108I | 0 | 9   | 63  | 0.00 | 0.01 | 0.00 | NA |
| K101H | E138Q | 0 | 9   | 12  | 0.00 | 0.00 | 0.00 | NA |

|       |       |   |   |     |      |      |      |    |
|-------|-------|---|---|-----|------|------|------|----|
| K101H | E138A | 0 | 9 | 51  | 0.00 | 0.01 | 0.00 | NA |
| K101H | I178F | 0 | 9 | 4   | 0.00 | 0.00 | 0.00 | NA |
| K101H | V179D | 0 | 9 | 20  | 0.00 | 0.00 | 0.00 | NA |
| K101H | V179T | 0 | 9 | 2   | 0.00 | 0.00 | 0.00 | NA |
| K101H | Y181V | 0 | 9 | 12  | 0.00 | 0.00 | 0.00 | NA |
| K101H | Y188L | 0 | 9 | 50  | 0.00 | 0.01 | 0.00 | NA |
| K101H | Y188C | 0 | 9 | 6   | 0.00 | 0.00 | 0.00 | NA |
| K101H | G190S | 0 | 9 | 17  | 0.00 | 0.00 | 0.00 | NA |
| K101H | H221Y | 0 | 9 | 113 | 0.00 | 0.01 | 0.00 | NA |
| K101H | P225H | 0 | 9 | 5   | 0.00 | 0.00 | 0.00 | NA |
| K101H | F227L | 0 | 9 | 27  | 0.00 | 0.00 | 0.00 | NA |
| K101H | M230L | 0 | 9 | 15  | 0.00 | 0.00 | 0.00 | NA |
| K101H | Y232H | 0 | 9 | 2   | 0.00 | 0.00 | 0.00 | NA |
| K101H | P236L | 0 | 9 | 3   | 0.00 | 0.00 | 0.00 | NA |
| K101H | D237E | 0 | 9 | 11  | 0.00 | 0.00 | 0.00 | NA |
| K101H | K238T | 0 | 9 | 31  | 0.00 | 0.00 | 0.00 | NA |
| K101H | K238N | 0 | 9 | 7   | 0.00 | 0.00 | 0.00 | NA |
| K101H | V241M | 0 | 9 | 5   | 0.00 | 0.00 | 0.00 | NA |
| K101H | Y318F | 0 | 9 | 2   | 0.00 | 0.00 | 0.00 | NA |
| K101N | K102N | 0 | 4 | 3   | 0.00 | 0.00 | 0.00 | NA |
| K101N | K103N | 0 | 3 | 450 | 0.00 | 0.00 | 0.00 | NA |
| K101N | K103S | 0 | 4 | 21  | 0.00 | 0.00 | 0.00 | NA |
| K101N | K103T | 0 | 4 | 3   | 0.00 | 0.00 | 0.00 | NA |
| K101N | V106A | 0 | 4 | 46  | 0.00 | 0.00 | 0.00 | NA |
| K101N | V106I | 0 | 4 | 26  | 0.00 | 0.00 | 0.00 | NA |
| K101N | V106M | 0 | 4 | 12  | 0.00 | 0.00 | 0.00 | NA |
| K101N | V108I | 0 | 3 | 62  | 0.00 | 0.00 | 0.00 | NA |
| K101N | E138Q | 0 | 4 | 12  | 0.00 | 0.00 | 0.00 | NA |
| K101N | E138A | 0 | 4 | 51  | 0.00 | 0.00 | 0.00 | NA |
| K101N | T139R | 0 | 4 | 17  | 0.00 | 0.00 | 0.00 | NA |
| K101N | I178F | 0 | 4 | 4   | 0.00 | 0.00 | 0.00 | NA |
| K101N | V179D | 0 | 4 | 20  | 0.00 | 0.00 | 0.00 | NA |
| K101N | V179T | 0 | 4 | 2   | 0.00 | 0.00 | 0.00 | NA |
| K101N | Y181I | 0 | 4 | 28  | 0.00 | 0.00 | 0.00 | NA |
| K101N | Y181V | 0 | 4 | 12  | 0.00 | 0.00 | 0.00 | NA |
| K101N | Y188L | 0 | 4 | 50  | 0.00 | 0.00 | 0.00 | NA |
| K101N | Y188C | 0 | 4 | 6   | 0.00 | 0.00 | 0.00 | NA |
| K101N | G190A | 0 | 4 | 301 | 0.00 | 0.00 | 0.00 | NA |
| K101N | G190S | 0 | 4 | 17  | 0.00 | 0.00 | 0.00 | NA |
| K101N | H221Y | 0 | 3 | 112 | 0.00 | 0.00 | 0.00 | NA |
| K101N | P225H | 0 | 4 | 5   | 0.00 | 0.00 | 0.00 | NA |
| K101N | F227L | 0 | 4 | 27  | 0.00 | 0.00 | 0.00 | NA |

|       |       |   |     |     |      |      |      |    |
|-------|-------|---|-----|-----|------|------|------|----|
| K101N | M230L | 0 | 4   | 15  | 0.00 | 0.00 | 0.00 | NA |
| K101N | Y232H | 0 | 4   | 2   | 0.00 | 0.00 | 0.00 | NA |
| K101N | P236L | 0 | 4   | 3   | 0.00 | 0.00 | 0.00 | NA |
| K101N | D237E | 0 | 4   | 11  | 0.00 | 0.00 | 0.00 | NA |
| K101N | K238T | 0 | 4   | 31  | 0.00 | 0.00 | 0.00 | NA |
| K101N | K238N | 0 | 4   | 7   | 0.00 | 0.00 | 0.00 | NA |
| K101N | V241M | 0 | 4   | 5   | 0.00 | 0.00 | 0.00 | NA |
| K101N | Y318F | 0 | 4   | 2   | 0.00 | 0.00 | 0.00 | NA |
| K102N | K103S | 0 | 3   | 21  | 0.00 | 0.00 | 0.00 | NA |
| K102N | K103T | 0 | 3   | 3   | 0.00 | 0.00 | 0.00 | NA |
| K102N | V106A | 0 | 3   | 46  | 0.00 | 0.00 | 0.00 | NA |
| K102N | V106I | 0 | 3   | 26  | 0.00 | 0.00 | 0.00 | NA |
| K102N | V106M | 0 | 3   | 13  | 0.00 | 0.00 | 0.00 | NA |
| K102N | V108I | 0 | 3   | 64  | 0.00 | 0.00 | 0.00 | NA |
| K102N | E138Q | 0 | 3   | 12  | 0.00 | 0.00 | 0.00 | NA |
| K102N | E138A | 0 | 3   | 52  | 0.00 | 0.00 | 0.00 | NA |
| K102N | T139R | 0 | 3   | 17  | 0.00 | 0.00 | 0.00 | NA |
| K102N | I178F | 0 | 3   | 4   | 0.00 | 0.00 | 0.00 | NA |
| K102N | V179D | 0 | 3   | 20  | 0.00 | 0.00 | 0.00 | NA |
| K102N | V179T | 0 | 3   | 2   | 0.00 | 0.00 | 0.00 | NA |
| K102N | Y181I | 0 | 3   | 28  | 0.00 | 0.00 | 0.00 | NA |
| K102N | Y181V | 0 | 3   | 12  | 0.00 | 0.00 | 0.00 | NA |
| K102N | Y188L | 0 | 3   | 50  | 0.00 | 0.00 | 0.00 | NA |
| K102N | Y188C | 0 | 3   | 6   | 0.00 | 0.00 | 0.00 | NA |
| K102N | G190S | 0 | 3   | 17  | 0.00 | 0.00 | 0.00 | NA |
| K102N | H221Y | 0 | 3   | 114 | 0.00 | 0.00 | 0.00 | NA |
| K102N | P225H | 0 | 3   | 5   | 0.00 | 0.00 | 0.00 | NA |
| K102N | F227L | 0 | 3   | 28  | 0.00 | 0.00 | 0.00 | NA |
| K102N | M230L | 0 | 3   | 15  | 0.00 | 0.00 | 0.00 | NA |
| K102N | Y232H | 0 | 3   | 2   | 0.00 | 0.00 | 0.00 | NA |
| K102N | P236L | 0 | 3   | 3   | 0.00 | 0.00 | 0.00 | NA |
| K102N | D237E | 0 | 3   | 11  | 0.00 | 0.00 | 0.00 | NA |
| K102N | K238T | 0 | 3   | 31  | 0.00 | 0.00 | 0.00 | NA |
| K102N | K238N | 0 | 3   | 7   | 0.00 | 0.00 | 0.00 | NA |
| K102N | V241M | 0 | 3   | 5   | 0.00 | 0.00 | 0.00 | NA |
| K102N | Y318F | 0 | 3   | 2   | 0.00 | 0.00 | 0.00 | NA |
| K103N | K103S | 0 | 450 | 21  | 0.00 | 0.02 | 0.00 | NA |
| K103N | K103T | 0 | 450 | 3   | 0.00 | 0.00 | 0.00 | NA |
| K103N | V106M | 0 | 449 | 12  | 0.00 | 0.01 | 0.00 | NA |
| K103N | I178F | 0 | 450 | 4   | 0.00 | 0.00 | 0.00 | NA |
| K103N | V179D | 0 | 450 | 20  | 0.00 | 0.01 | 0.00 | NA |
| K103N | V179T | 0 | 448 | 2   | 0.00 | 0.00 | 0.00 | NA |

|       |       |   |     |     |      |      |      |    |
|-------|-------|---|-----|-----|------|------|------|----|
| K103N | Y188C | 0 | 450 | 6   | 0.00 | 0.00 | 0.00 | NA |
| K103S | K103T | 0 | 21  | 3   | 0.00 | 0.00 | 0.00 | NA |
| K103S | V106A | 0 | 21  | 45  | 0.00 | 0.01 | 0.00 | NA |
| K103S | V106I | 0 | 21  | 26  | 0.00 | 0.01 | 0.00 | NA |
| K103S | V108I | 0 | 21  | 64  | 0.00 | 0.01 | 0.00 | NA |
| K103S | E138Q | 0 | 21  | 12  | 0.00 | 0.01 | 0.00 | NA |
| K103S | E138A | 0 | 21  | 52  | 0.00 | 0.01 | 0.00 | NA |
| K103S | T139R | 0 | 21  | 17  | 0.00 | 0.01 | 0.00 | NA |
| K103S | I178F | 0 | 21  | 4   | 0.00 | 0.00 | 0.00 | NA |
| K103S | V179D | 0 | 21  | 20  | 0.00 | 0.01 | 0.00 | NA |
| K103S | V179T | 0 | 21  | 2   | 0.00 | 0.00 | 0.00 | NA |
| K103S | Y181C | 0 | 21  | 542 | 0.00 | 0.02 | 0.00 | NA |
| K103S | Y181I | 0 | 21  | 28  | 0.00 | 0.01 | 0.00 | NA |
| K103S | Y181V | 0 | 21  | 12  | 0.00 | 0.01 | 0.00 | NA |
| K103S | Y188L | 0 | 21  | 50  | 0.00 | 0.01 | 0.00 | NA |
| K103S | Y188C | 0 | 21  | 6   | 0.00 | 0.00 | 0.00 | NA |
| K103S | G190S | 0 | 21  | 17  | 0.00 | 0.01 | 0.00 | NA |
| K103S | H221Y | 0 | 21  | 114 | 0.00 | 0.01 | 0.00 | NA |
| K103S | P225H | 0 | 21  | 5   | 0.00 | 0.00 | 0.00 | NA |
| K103S | F227L | 0 | 21  | 27  | 0.00 | 0.01 | 0.00 | NA |
| K103S | M230L | 0 | 21  | 15  | 0.00 | 0.01 | 0.00 | NA |
| K103S | Y232H | 0 | 21  | 2   | 0.00 | 0.00 | 0.00 | NA |
| K103S | P236L | 0 | 21  | 3   | 0.00 | 0.00 | 0.00 | NA |
| K103S | D237E | 0 | 21  | 10  | 0.00 | 0.01 | 0.00 | NA |
| K103S | K238T | 0 | 21  | 31  | 0.00 | 0.01 | 0.00 | NA |
| K103S | K238N | 0 | 21  | 7   | 0.00 | 0.00 | 0.00 | NA |
| K103S | V241M | 0 | 21  | 5   | 0.00 | 0.00 | 0.00 | NA |
| K103S | Y318F | 0 | 21  | 2   | 0.00 | 0.00 | 0.00 | NA |
| K103T | V106A | 0 | 3   | 46  | 0.00 | 0.00 | 0.00 | NA |
| K103T | V106I | 0 | 3   | 26  | 0.00 | 0.00 | 0.00 | NA |
| K103T | V106M | 0 | 3   | 12  | 0.00 | 0.00 | 0.00 | NA |
| K103T | V108I | 0 | 3   | 64  | 0.00 | 0.00 | 0.00 | NA |
| K103T | E138Q | 0 | 3   | 12  | 0.00 | 0.00 | 0.00 | NA |
| K103T | E138A | 0 | 3   | 52  | 0.00 | 0.00 | 0.00 | NA |
| K103T | T139R | 0 | 3   | 17  | 0.00 | 0.00 | 0.00 | NA |
| K103T | I178F | 0 | 3   | 4   | 0.00 | 0.00 | 0.00 | NA |
| K103T | V179D | 0 | 3   | 20  | 0.00 | 0.00 | 0.00 | NA |
| K103T | V179T | 0 | 3   | 2   | 0.00 | 0.00 | 0.00 | NA |
| K103T | Y181I | 0 | 3   | 28  | 0.00 | 0.00 | 0.00 | NA |
| K103T | Y181V | 0 | 3   | 12  | 0.00 | 0.00 | 0.00 | NA |
| K103T | Y188L | 0 | 3   | 50  | 0.00 | 0.00 | 0.00 | NA |
| K103T | Y188C | 0 | 3   | 6   | 0.00 | 0.00 | 0.00 | NA |

|       |       |   |    |     |      |      |      |    |
|-------|-------|---|----|-----|------|------|------|----|
| K103T | G190A | 0 | 3  | 302 | 0.00 | 0.00 | 0.00 | NA |
| K103T | G190S | 0 | 3  | 17  | 0.00 | 0.00 | 0.00 | NA |
| K103T | H221Y | 0 | 3  | 114 | 0.00 | 0.00 | 0.00 | NA |
| K103T | P225H | 0 | 3  | 5   | 0.00 | 0.00 | 0.00 | NA |
| K103T | F227L | 0 | 3  | 28  | 0.00 | 0.00 | 0.00 | NA |
| K103T | Y232H | 0 | 3  | 2   | 0.00 | 0.00 | 0.00 | NA |
| K103T | P236L | 0 | 3  | 3   | 0.00 | 0.00 | 0.00 | NA |
| K103T | D237E | 0 | 3  | 11  | 0.00 | 0.00 | 0.00 | NA |
| K103T | V241M | 0 | 3  | 5   | 0.00 | 0.00 | 0.00 | NA |
| K103T | Y318F | 0 | 3  | 2   | 0.00 | 0.00 | 0.00 | NA |
| V106A | V106I | 0 | 46 | 26  | 0.00 | 0.01 | 0.00 | NA |
| V106A | V106M | 0 | 46 | 13  | 0.00 | 0.01 | 0.00 | NA |
| V106A | E138Q | 0 | 46 | 11  | 0.00 | 0.01 | 0.00 | NA |
| V106A | E138A | 0 | 46 | 52  | 0.00 | 0.02 | 0.00 | NA |
| V106A | T139R | 0 | 45 | 17  | 0.00 | 0.01 | 0.00 | NA |
| V106A | I178F | 0 | 46 | 4   | 0.00 | 0.00 | 0.00 | NA |
| V106A | V179D | 0 | 46 | 20  | 0.00 | 0.01 | 0.00 | NA |
| V106A | V179T | 0 | 46 | 2   | 0.00 | 0.00 | 0.00 | NA |
| V106A | Y181I | 0 | 46 | 28  | 0.00 | 0.01 | 0.00 | NA |
| V106A | Y181V | 0 | 46 | 12  | 0.00 | 0.01 | 0.00 | NA |
| V106A | Y188L | 0 | 46 | 50  | 0.00 | 0.02 | 0.00 | NA |
| V106A | Y188C | 0 | 46 | 6   | 0.00 | 0.00 | 0.00 | NA |
| V106A | G190S | 0 | 46 | 17  | 0.00 | 0.01 | 0.00 | NA |
| V106A | P236L | 0 | 46 | 3   | 0.00 | 0.00 | 0.00 | NA |
| V106A | K238N | 0 | 46 | 6   | 0.00 | 0.00 | 0.00 | NA |
| V106A | V241M | 0 | 46 | 5   | 0.00 | 0.00 | 0.00 | NA |
| V106A | Y318F | 0 | 46 | 2   | 0.00 | 0.00 | 0.00 | NA |
| V106I | V106M | 0 | 26 | 13  | 0.00 | 0.01 | 0.00 | NA |
| V106I | E138Q | 0 | 26 | 11  | 0.00 | 0.01 | 0.00 | NA |
| V106I | E138A | 0 | 26 | 52  | 0.00 | 0.01 | 0.00 | NA |
| V106I | T139R | 0 | 26 | 17  | 0.00 | 0.01 | 0.00 | NA |
| V106I | I178F | 0 | 26 | 4   | 0.00 | 0.00 | 0.00 | NA |
| V106I | V179D | 0 | 26 | 20  | 0.00 | 0.01 | 0.00 | NA |
| V106I | V179T | 0 | 26 | 2   | 0.00 | 0.00 | 0.00 | NA |
| V106I | Y181V | 0 | 26 | 12  | 0.00 | 0.01 | 0.00 | NA |
| V106I | G190S | 0 | 26 | 17  | 0.00 | 0.01 | 0.00 | NA |
| V106I | P225H | 0 | 26 | 5   | 0.00 | 0.00 | 0.00 | NA |
| V106I | F227L | 0 | 26 | 28  | 0.00 | 0.01 | 0.00 | NA |
| V106I | M230L | 0 | 26 | 14  | 0.00 | 0.01 | 0.00 | NA |
| V106I | Y232H | 0 | 26 | 2   | 0.00 | 0.00 | 0.00 | NA |
| V106I | D237E | 0 | 26 | 11  | 0.00 | 0.01 | 0.00 | NA |
| V106I | K238T | 0 | 26 | 31  | 0.00 | 0.01 | 0.00 | NA |



|       |       |   |    |    |      |      |      |    |
|-------|-------|---|----|----|------|------|------|----|
| V106I | K238N | 0 | 26 | 7  | 0.00 | 0.00 | 0.00 | NA |
| V106I | V241M | 0 | 26 | 5  | 0.00 | 0.00 | 0.00 | NA |
| V106I | Y318F | 0 | 26 | 2  | 0.00 | 0.00 | 0.00 | NA |
| V106M | V108I | 0 | 13 | 64 | 0.00 | 0.01 | 0.00 | NA |
| V106M | E138Q | 0 | 13 | 12 | 0.00 | 0.00 | 0.00 | NA |
| V106M | E138A | 0 | 13 | 52 | 0.00 | 0.01 | 0.00 | NA |
| V106M | T139R | 0 | 13 | 17 | 0.00 | 0.01 | 0.00 | NA |
| V106M | I178F | 0 | 13 | 4  | 0.00 | 0.00 | 0.00 | NA |
| V106M | V179T | 0 | 13 | 2  | 0.00 | 0.00 | 0.00 | NA |
| V106M | Y181I | 0 | 13 | 28 | 0.00 | 0.01 | 0.00 | NA |
| V106M | Y181V | 0 | 13 | 12 | 0.00 | 0.00 | 0.00 | NA |
| V106M | Y188L | 0 | 13 | 50 | 0.00 | 0.01 | 0.00 | NA |
| V106M | G190S | 0 | 13 | 17 | 0.00 | 0.01 | 0.00 | NA |
| V106M | P225H | 0 | 13 | 5  | 0.00 | 0.00 | 0.00 | NA |
| V106M | Y232H | 0 | 13 | 2  | 0.00 | 0.00 | 0.00 | NA |
| V106M | P236L | 0 | 13 | 3  | 0.00 | 0.00 | 0.00 | NA |
| V106M | D237E | 0 | 13 | 11 | 0.00 | 0.00 | 0.00 | NA |
| V106M | K238T | 0 | 13 | 31 | 0.00 | 0.01 | 0.00 | NA |
| V106M | K238N | 0 | 13 | 7  | 0.00 | 0.00 | 0.00 | NA |
| V106M | V241M | 0 | 13 | 5  | 0.00 | 0.00 | 0.00 | NA |
| V106M | Y318F | 0 | 13 | 2  | 0.00 | 0.00 | 0.00 | NA |
| V108I | E138Q | 0 | 64 | 12 | 0.00 | 0.01 | 0.00 | NA |
| V108I | T139R | 0 | 64 | 17 | 0.00 | 0.01 | 0.00 | NA |
| V108I | I178F | 0 | 64 | 4  | 0.00 | 0.00 | 0.00 | NA |
| V108I | V179T | 0 | 63 | 2  | 0.00 | 0.00 | 0.00 | NA |
| V108I | Y181V | 0 | 64 | 12 | 0.00 | 0.01 | 0.00 | NA |
| V108I | Y188L | 0 | 64 | 49 | 0.00 | 0.02 | 0.00 | NA |
| V108I | Y188C | 0 | 64 | 6  | 0.00 | 0.00 | 0.00 | NA |
| V108I | P225H | 0 | 64 | 5  | 0.00 | 0.00 | 0.00 | NA |
| V108I | Y232H | 0 | 64 | 2  | 0.00 | 0.00 | 0.00 | NA |
| V108I | P236L | 0 | 64 | 3  | 0.00 | 0.00 | 0.00 | NA |
| V108I | D237E | 0 | 63 | 11 | 0.00 | 0.01 | 0.00 | NA |
| V108I | Y318F | 0 | 64 | 2  | 0.00 | 0.00 | 0.00 | NA |
| E138Q | E138A | 0 | 12 | 52 | 0.00 | 0.01 | 0.00 | NA |
| E138Q | T139R | 0 | 12 | 17 | 0.00 | 0.01 | 0.00 | NA |
| E138Q | I178F | 0 | 12 | 4  | 0.00 | 0.00 | 0.00 | NA |
| E138Q | V179D | 0 | 12 | 20 | 0.00 | 0.01 | 0.00 | NA |
| E138Q | V179T | 0 | 12 | 2  | 0.00 | 0.00 | 0.00 | NA |
| E138Q | Y181I | 0 | 12 | 28 | 0.00 | 0.01 | 0.00 | NA |
| E138Q | Y181V | 0 | 12 | 12 | 0.00 | 0.00 | 0.00 | NA |
| E138Q | Y188L | 0 | 12 | 50 | 0.00 | 0.01 | 0.00 | NA |
| E138Q | Y188C | 0 | 12 | 6  | 0.00 | 0.00 | 0.00 | NA |

|       |       |   |    |     |      |      |      |    |
|-------|-------|---|----|-----|------|------|------|----|
| E138Q | G190S | 0 | 12 | 17  | 0.00 | 0.01 | 0.00 | NA |
| E138Q | H221Y | 0 | 12 | 113 | 0.00 | 0.01 | 0.00 | NA |
| E138Q | P225H | 0 | 12 | 5   | 0.00 | 0.00 | 0.00 | NA |
| E138Q | F227L | 0 | 12 | 28  | 0.00 | 0.01 | 0.00 | NA |
| E138Q | Y232H | 0 | 12 | 2   | 0.00 | 0.00 | 0.00 | NA |
| E138Q | P236L | 0 | 12 | 3   | 0.00 | 0.00 | 0.00 | NA |
| E138Q | D237E | 0 | 12 | 11  | 0.00 | 0.00 | 0.00 | NA |
| E138Q | K238T | 0 | 11 | 31  | 0.00 | 0.00 | 0.00 | NA |
| E138Q | K238N | 0 | 11 | 7   | 0.00 | 0.00 | 0.00 | NA |
| E138Q | V241M | 0 | 12 | 5   | 0.00 | 0.00 | 0.00 | NA |
| E138Q | Y318F | 0 | 12 | 2   | 0.00 | 0.00 | 0.00 | NA |
| E138A | T139R | 0 | 52 | 17  | 0.00 | 0.01 | 0.00 | NA |
| E138A | I178F | 0 | 52 | 4   | 0.00 | 0.00 | 0.00 | NA |
| E138A | V179T | 0 | 52 | 2   | 0.00 | 0.00 | 0.00 | NA |
| E138A | Y181V | 0 | 52 | 12  | 0.00 | 0.01 | 0.00 | NA |
| E138A | Y188C | 0 | 52 | 6   | 0.00 | 0.00 | 0.00 | NA |
| E138A | P225H | 0 | 52 | 5   | 0.00 | 0.00 | 0.00 | NA |
| E138A | M230L | 0 | 52 | 15  | 0.00 | 0.01 | 0.00 | NA |
| E138A | Y232H | 0 | 52 | 2   | 0.00 | 0.00 | 0.00 | NA |
| E138A | P236L | 0 | 52 | 3   | 0.00 | 0.00 | 0.00 | NA |
| E138A | D237E | 0 | 52 | 11  | 0.00 | 0.01 | 0.00 | NA |
| E138A | K238N | 0 | 52 | 7   | 0.00 | 0.00 | 0.00 | NA |
| E138A | V241M | 0 | 52 | 5   | 0.00 | 0.00 | 0.00 | NA |
| E138A | Y318F | 0 | 52 | 2   | 0.00 | 0.00 | 0.00 | NA |
| T139R | I178F | 0 | 17 | 4   | 0.00 | 0.00 | 0.00 | NA |
| T139R | V179D | 0 | 17 | 20  | 0.00 | 0.01 | 0.00 | NA |
| T139R | V179T | 0 | 17 | 2   | 0.00 | 0.00 | 0.00 | NA |
| T139R | Y181I | 0 | 17 | 28  | 0.00 | 0.01 | 0.00 | NA |
| T139R | Y181V | 0 | 17 | 12  | 0.00 | 0.00 | 0.00 | NA |
| T139R | Y188L | 0 | 17 | 50  | 0.00 | 0.01 | 0.00 | NA |
| T139R | Y188C | 0 | 17 | 6   | 0.00 | 0.00 | 0.00 | NA |
| T139R | G190S | 0 | 17 | 17  | 0.00 | 0.01 | 0.00 | NA |
| T139R | P225H | 0 | 17 | 5   | 0.00 | 0.00 | 0.00 | NA |
| T139R | F227L | 0 | 17 | 28  | 0.00 | 0.01 | 0.00 | NA |
| T139R | M230L | 0 | 17 | 15  | 0.00 | 0.01 | 0.00 | NA |
| T139R | Y232H | 0 | 17 | 2   | 0.00 | 0.00 | 0.00 | NA |
| T139R | P236L | 0 | 17 | 3   | 0.00 | 0.00 | 0.00 | NA |
| T139R | D237E | 0 | 17 | 11  | 0.00 | 0.00 | 0.00 | NA |
| T139R | K238N | 0 | 17 | 7   | 0.00 | 0.00 | 0.00 | NA |
| T139R | V241M | 0 | 17 | 5   | 0.00 | 0.00 | 0.00 | NA |
| T139R | Y318F | 0 | 17 | 2   | 0.00 | 0.00 | 0.00 | NA |
| I178F | V179D | 0 | 4  | 20  | 0.00 | 0.00 | 0.00 | NA |

|       |       |   |    |     |      |      |      |    |
|-------|-------|---|----|-----|------|------|------|----|
| I178F | V179T | 0 | 4  | 2   | 0.00 | 0.00 | 0.00 | NA |
| I178F | Y181I | 0 | 4  | 28  | 0.00 | 0.00 | 0.00 | NA |
| I178F | Y181V | 0 | 4  | 12  | 0.00 | 0.00 | 0.00 | NA |
| I178F | Y188L | 0 | 4  | 50  | 0.00 | 0.00 | 0.00 | NA |
| I178F | Y188C | 0 | 4  | 6   | 0.00 | 0.00 | 0.00 | NA |
| I178F | G190S | 0 | 4  | 17  | 0.00 | 0.00 | 0.00 | NA |
| I178F | P225H | 0 | 4  | 5   | 0.00 | 0.00 | 0.00 | NA |
| I178F | F227L | 0 | 4  | 28  | 0.00 | 0.00 | 0.00 | NA |
| I178F | M230L | 0 | 4  | 15  | 0.00 | 0.00 | 0.00 | NA |
| I178F | Y232H | 0 | 4  | 2   | 0.00 | 0.00 | 0.00 | NA |
| I178F | P236L | 0 | 4  | 3   | 0.00 | 0.00 | 0.00 | NA |
| I178F | D237E | 0 | 4  | 11  | 0.00 | 0.00 | 0.00 | NA |
| I178F | K238T | 0 | 4  | 31  | 0.00 | 0.00 | 0.00 | NA |
| I178F | K238N | 0 | 4  | 7   | 0.00 | 0.00 | 0.00 | NA |
| I178F | V241M | 0 | 4  | 5   | 0.00 | 0.00 | 0.00 | NA |
| I178F | Y318F | 0 | 4  | 2   | 0.00 | 0.00 | 0.00 | NA |
| V179D | V179T | 0 | 20 | 2   | 0.00 | 0.00 | 0.00 | NA |
| V179D | Y181V | 0 | 20 | 12  | 0.00 | 0.00 | 0.00 | NA |
| V179D | Y188C | 0 | 20 | 6   | 0.00 | 0.00 | 0.00 | NA |
| V179D | G190S | 0 | 20 | 17  | 0.00 | 0.01 | 0.00 | NA |
| V179D | P225H | 0 | 20 | 5   | 0.00 | 0.00 | 0.00 | NA |
| V179D | F227L | 0 | 19 | 28  | 0.00 | 0.01 | 0.00 | NA |
| V179D | Y232H | 0 | 20 | 2   | 0.00 | 0.00 | 0.00 | NA |
| V179D | P236L | 0 | 20 | 3   | 0.00 | 0.00 | 0.00 | NA |
| V179D | D237E | 0 | 20 | 11  | 0.00 | 0.01 | 0.00 | NA |
| V179D | K238N | 0 | 20 | 7   | 0.00 | 0.00 | 0.00 | NA |
| V179D | V241M | 0 | 20 | 5   | 0.00 | 0.00 | 0.00 | NA |
| V179D | Y318F | 0 | 20 | 2   | 0.00 | 0.00 | 0.00 | NA |
| V179T | Y181I | 0 | 2  | 28  | 0.00 | 0.00 | 0.00 | NA |
| V179T | Y181V | 0 | 2  | 12  | 0.00 | 0.00 | 0.00 | NA |
| V179T | Y188L | 0 | 2  | 50  | 0.00 | 0.00 | 0.00 | NA |
| V179T | Y188C | 0 | 2  | 6   | 0.00 | 0.00 | 0.00 | NA |
| V179T | H221Y | 0 | 2  | 113 | 0.00 | 0.00 | 0.00 | NA |
| V179T | P225H | 0 | 2  | 5   | 0.00 | 0.00 | 0.00 | NA |
| V179T | F227L | 0 | 2  | 28  | 0.00 | 0.00 | 0.00 | NA |
| V179T | M230L | 0 | 2  | 15  | 0.00 | 0.00 | 0.00 | NA |
| V179T | Y232H | 0 | 2  | 2   | 0.00 | 0.00 | 0.00 | NA |
| V179T | P236L | 0 | 2  | 3   | 0.00 | 0.00 | 0.00 | NA |
| V179T | D237E | 0 | 2  | 11  | 0.00 | 0.00 | 0.00 | NA |
| V179T | K238T | 0 | 2  | 31  | 0.00 | 0.00 | 0.00 | NA |
| V179T | K238N | 0 | 2  | 7   | 0.00 | 0.00 | 0.00 | NA |
| V179T | V241M | 0 | 2  | 5   | 0.00 | 0.00 | 0.00 | NA |

|       |       |   |     |     |      |      |      |    |
|-------|-------|---|-----|-----|------|------|------|----|
| V179T | Y318F | 0 | 2   | 2   | 0.00 | 0.00 | 0.00 | NA |
| Y181C | Y181I | 0 | 545 | 28  | 0.00 | 0.02 | 0.00 | NA |
| Y181C | Y181V | 0 | 545 | 12  | 0.00 | 0.01 | 0.00 | NA |
| Y181C | Y188C | 0 | 545 | 6   | 0.00 | 0.00 | 0.00 | NA |
| Y181C | P225H | 0 | 545 | 5   | 0.00 | 0.00 | 0.00 | NA |
| Y181C | Y232H | 0 | 545 | 2   | 0.00 | 0.00 | 0.00 | NA |
| Y181I | Y181V | 0 | 28  | 12  | 0.00 | 0.01 | 0.00 | NA |
| Y181I | Y188L | 0 | 28  | 50  | 0.00 | 0.01 | 0.00 | NA |
| Y181I | Y188C | 0 | 28  | 6   | 0.00 | 0.00 | 0.00 | NA |
| Y181I | G190A | 0 | 28  | 303 | 0.00 | 0.02 | 0.00 | NA |
| Y181I | G190S | 0 | 28  | 17  | 0.00 | 0.01 | 0.00 | NA |
| Y181I | P225H | 0 | 28  | 5   | 0.00 | 0.00 | 0.00 | NA |
| Y181I | F227L | 0 | 28  | 28  | 0.00 | 0.01 | 0.00 | NA |
| Y181I | M230L | 0 | 28  | 15  | 0.00 | 0.01 | 0.00 | NA |
| Y181I | Y232H | 0 | 28  | 2   | 0.00 | 0.00 | 0.00 | NA |
| Y181I | P236L | 0 | 28  | 3   | 0.00 | 0.00 | 0.00 | NA |
| Y181I | D237E | 0 | 28  | 11  | 0.00 | 0.01 | 0.00 | NA |
| Y181I | K238T | 0 | 28  | 31  | 0.00 | 0.01 | 0.00 | NA |
| Y181I | K238N | 0 | 28  | 7   | 0.00 | 0.00 | 0.00 | NA |
| Y181I | V241M | 0 | 28  | 5   | 0.00 | 0.00 | 0.00 | NA |
| Y181I | Y318F | 0 | 28  | 2   | 0.00 | 0.00 | 0.00 | NA |
| Y181V | Y188L | 0 | 12  | 50  | 0.00 | 0.01 | 0.00 | NA |
| Y181V | Y188C | 0 | 12  | 6   | 0.00 | 0.00 | 0.00 | NA |
| Y181V | G190A | 0 | 12  | 303 | 0.00 | 0.01 | 0.00 | NA |
| Y181V | G190S | 0 | 12  | 17  | 0.00 | 0.01 | 0.00 | NA |
| Y181V | P225H | 0 | 12  | 5   | 0.00 | 0.00 | 0.00 | NA |
| Y181V | F227L | 0 | 12  | 28  | 0.00 | 0.01 | 0.00 | NA |
| Y181V | M230L | 0 | 12  | 15  | 0.00 | 0.00 | 0.00 | NA |
| Y181V | Y232H | 0 | 12  | 2   | 0.00 | 0.00 | 0.00 | NA |
| Y181V | P236L | 0 | 12  | 3   | 0.00 | 0.00 | 0.00 | NA |
| Y181V | D237E | 0 | 12  | 11  | 0.00 | 0.00 | 0.00 | NA |
| Y181V | K238T | 0 | 12  | 31  | 0.00 | 0.01 | 0.00 | NA |
| Y181V | K238N | 0 | 12  | 7   | 0.00 | 0.00 | 0.00 | NA |
| Y181V | V241M | 0 | 12  | 5   | 0.00 | 0.00 | 0.00 | NA |
| Y181V | Y318F | 0 | 12  | 2   | 0.00 | 0.00 | 0.00 | NA |
| Y188L | Y188C | 0 | 50  | 6   | 0.00 | 0.00 | 0.00 | NA |
| Y188L | G190A | 0 | 50  | 303 | 0.00 | 0.03 | 0.00 | NA |
| Y188L | G190S | 0 | 50  | 17  | 0.00 | 0.01 | 0.00 | NA |
| Y188L | P225H | 0 | 50  | 5   | 0.00 | 0.00 | 0.00 | NA |
| Y188L | F227L | 0 | 50  | 28  | 0.00 | 0.01 | 0.00 | NA |
| Y188L | M230L | 0 | 50  | 15  | 0.00 | 0.01 | 0.00 | NA |
| Y188L | Y232H | 0 | 50  | 2   | 0.00 | 0.00 | 0.00 | NA |

|       |       |   |     |     |      |      |      |    |
|-------|-------|---|-----|-----|------|------|------|----|
| Y188L | P236L | 0 | 50  | 3   | 0.00 | 0.00 | 0.00 | NA |
| Y188L | D237E | 0 | 49  | 11  | 0.00 | 0.01 | 0.00 | NA |
| Y188L | K238T | 0 | 50  | 31  | 0.00 | 0.01 | 0.00 | NA |
| Y188L | K238N | 0 | 50  | 7   | 0.00 | 0.00 | 0.00 | NA |
| Y188L | V241M | 0 | 50  | 5   | 0.00 | 0.00 | 0.00 | NA |
| Y188L | Y318F | 0 | 50  | 2   | 0.00 | 0.00 | 0.00 | NA |
| Y188C | G190A | 0 | 6   | 303 | 0.00 | 0.00 | 0.00 | NA |
| Y188C | G190S | 0 | 6   | 17  | 0.00 | 0.00 | 0.00 | NA |
| Y188C | P225H | 0 | 6   | 5   | 0.00 | 0.00 | 0.00 | NA |
| Y188C | F227L | 0 | 6   | 28  | 0.00 | 0.00 | 0.00 | NA |
| Y188C | M230L | 0 | 6   | 15  | 0.00 | 0.00 | 0.00 | NA |
| Y188C | Y232H | 0 | 6   | 2   | 0.00 | 0.00 | 0.00 | NA |
| Y188C | P236L | 0 | 6   | 3   | 0.00 | 0.00 | 0.00 | NA |
| Y188C | D237E | 0 | 6   | 11  | 0.00 | 0.00 | 0.00 | NA |
| Y188C | K238T | 0 | 6   | 31  | 0.00 | 0.00 | 0.00 | NA |
| Y188C | K238N | 0 | 6   | 7   | 0.00 | 0.00 | 0.00 | NA |
| Y188C | V241M | 0 | 6   | 5   | 0.00 | 0.00 | 0.00 | NA |
| Y188C | Y318F | 0 | 6   | 2   | 0.00 | 0.00 | 0.00 | NA |
| G190A | G190S | 0 | 303 | 17  | 0.00 | 0.01 | 0.00 | NA |
| G190A | K238N | 0 | 303 | 6   | 0.00 | 0.00 | 0.00 | NA |
| G190A | V241M | 0 | 303 | 5   | 0.00 | 0.00 | 0.00 | NA |
| G190S | H221Y | 0 | 17  | 114 | 0.00 | 0.01 | 0.00 | NA |
| G190S | P225H | 0 | 17  | 5   | 0.00 | 0.00 | 0.00 | NA |
| G190S | F227L | 0 | 17  | 28  | 0.00 | 0.01 | 0.00 | NA |
| G190S | M230L | 0 | 17  | 15  | 0.00 | 0.01 | 0.00 | NA |
| G190S | Y232H | 0 | 17  | 2   | 0.00 | 0.00 | 0.00 | NA |
| G190S | P236L | 0 | 17  | 3   | 0.00 | 0.00 | 0.00 | NA |
| G190S | D237E | 0 | 17  | 11  | 0.00 | 0.00 | 0.00 | NA |
| G190S | K238N | 0 | 17  | 7   | 0.00 | 0.00 | 0.00 | NA |
| G190S | V241M | 0 | 17  | 5   | 0.00 | 0.00 | 0.00 | NA |
| G190S | Y318F | 0 | 17  | 2   | 0.00 | 0.00 | 0.00 | NA |
| H221Y | P225H | 0 | 114 | 5   | 0.00 | 0.00 | 0.00 | NA |
| H221Y | Y232H | 0 | 114 | 2   | 0.00 | 0.00 | 0.00 | NA |
| H221Y | D237E | 0 | 114 | 10  | 0.00 | 0.01 | 0.00 | NA |
| H221Y | K238N | 0 | 114 | 7   | 0.00 | 0.00 | 0.00 | NA |
| H221Y | Y318F | 0 | 114 | 2   | 0.00 | 0.00 | 0.00 | NA |
| P225H | M230L | 0 | 5   | 15  | 0.00 | 0.00 | 0.00 | NA |
| P225H | Y232H | 0 | 5   | 2   | 0.00 | 0.00 | 0.00 | NA |
| P225H | P236L | 0 | 5   | 3   | 0.00 | 0.00 | 0.00 | NA |
| P225H | D237E | 0 | 5   | 11  | 0.00 | 0.00 | 0.00 | NA |
| P225H | K238N | 0 | 5   | 7   | 0.00 | 0.00 | 0.00 | NA |
| P225H | V241M | 0 | 5   | 5   | 0.00 | 0.00 | 0.00 | NA |

|       |       |   |    |    |      |      |      |    |
|-------|-------|---|----|----|------|------|------|----|
| P225H | Y318F | 0 | 5  | 2  | 0.00 | 0.00 | 0.00 | NA |
| F227L | Y232H | 0 | 28 | 2  | 0.00 | 0.00 | 0.00 | NA |
| F227L | P236L | 0 | 28 | 3  | 0.00 | 0.00 | 0.00 | NA |
| F227L | K238N | 0 | 28 | 7  | 0.00 | 0.00 | 0.00 | NA |
| F227L | V241M | 0 | 28 | 5  | 0.00 | 0.00 | 0.00 | NA |
| F227L | Y318F | 0 | 28 | 2  | 0.00 | 0.00 | 0.00 | NA |
| M230L | Y232H | 0 | 15 | 2  | 0.00 | 0.00 | 0.00 | NA |
| M230L | P236L | 0 | 15 | 3  | 0.00 | 0.00 | 0.00 | NA |
| M230L | D237E | 0 | 14 | 11 | 0.00 | 0.00 | 0.00 | NA |
| M230L | K238N | 0 | 15 | 7  | 0.00 | 0.00 | 0.00 | NA |
| M230L | V241M | 0 | 15 | 5  | 0.00 | 0.00 | 0.00 | NA |
| M230L | Y318F | 0 | 15 | 2  | 0.00 | 0.00 | 0.00 | NA |
| Y232H | P236L | 0 | 2  | 3  | 0.00 | 0.00 | 0.00 | NA |
| Y232H | D237E | 0 | 2  | 11 | 0.00 | 0.00 | 0.00 | NA |
| Y232H | K238T | 0 | 2  | 31 | 0.00 | 0.00 | 0.00 | NA |
| Y232H | K238N | 0 | 2  | 7  | 0.00 | 0.00 | 0.00 | NA |
| Y232H | V241M | 0 | 2  | 5  | 0.00 | 0.00 | 0.00 | NA |
| Y232H | Y318F | 0 | 2  | 2  | 0.00 | 0.00 | 0.00 | NA |
| P236L | D237E | 0 | 3  | 11 | 0.00 | 0.00 | 0.00 | NA |
| P236L | K238N | 0 | 3  | 7  | 0.00 | 0.00 | 0.00 | NA |
| P236L | V241M | 0 | 3  | 5  | 0.00 | 0.00 | 0.00 | NA |
| P236L | Y318F | 0 | 3  | 2  | 0.00 | 0.00 | 0.00 | NA |
| D237E | K238T | 0 | 11 | 31 | 0.00 | 0.01 | 0.00 | NA |
| D237E | V241M | 0 | 11 | 4  | 0.00 | 0.00 | 0.00 | NA |
| D237E | Y318F | 0 | 11 | 2  | 0.00 | 0.00 | 0.00 | NA |
| K238T | K238N | 0 | 31 | 7  | 0.00 | 0.00 | 0.00 | NA |
| K238T | V241M | 0 | 31 | 5  | 0.00 | 0.00 | 0.00 | NA |
| K238T | Y318F | 0 | 31 | 2  | 0.00 | 0.00 | 0.00 | NA |
| K238N | Y318F | 0 | 7  | 2  | 0.00 | 0.00 | 0.00 | NA |
| V241M | Y318F | 0 | 5  | 2  | 0.00 | 0.00 | 0.00 | NA |

\* Occurrences in the dataset of 1,510 sequences from NVP-experienced patients. Each sequence contained at least 1 NNRTI-associated mutation; only 1 isolate per patient was included in the analysis and sequences with mixtures at a given position were excluded from comparisons at that position. XY: isolates containing both mutations; X only: isolates containing mutation X but not mutation Y; Y only: isolates containing mutation Y but not mutation X. Bolded mutation pairs have significant positive covariances following correction for multiple comparisons at  $p < 0.05$ .

† J: Jaccard similarity coefficients;  $J_{\text{RAND}}$ : expected value of the Jaccard similarity coefficient assuming Mutation X and Mutation Y occur independently based on a permutation procedure described in Methods;  $J_{\text{SE}}$ : the standard error of J; Z:  $(J - J_{\text{RAND}}) / J_{\text{SE}}$ . A negative Z score indicates a negative correlation. Z scores marked NA indicate zero sequences with both mutations.

**Table S4.** Covariation of NNRTI- and NRTI-selected mutations

| Mutation X<br>(NNRTI-selected) | Mutation Y<br>(NRTI-selected) | Occurrences* |        |        | Association† |                   |                 |       |          |
|--------------------------------|-------------------------------|--------------|--------|--------|--------------|-------------------|-----------------|-------|----------|
|                                |                               | XY           | X only | Y only | J            | J <sub>RAND</sub> | J <sub>SE</sub> | Z     | p        |
| P225H                          | L210W                         | 10           | 242    | 2961   | 0.00         | 0.03              | 0.00            | -25.9 | 9.2E-148 |
| P225H                          | T215Y                         | 27           | 217    | 3253   | 0.01         | 0.03              | 0.00            | -15.3 | 9.3E-53  |
| P225H                          | M41L                          | 40           | 208    | 4392   | 0.01         | 0.03              | 0.00            | -14.9 | 1.6E-50  |
| A98G                           | K65R                          | 6            | 871    | 393    | 0.00         | 0.03              | 0.00            | -14.9 | 4.2E-50  |
| Y181C                          | L74IV                         | 864          | 1404   | 1067   | 0.26         | 0.15              | 0.01            | 14.1  | 2.5E-45  |
| L100I                          | L74IV                         | 321          | 204    | 1656   | 0.15         | 0.05              | 0.01            | 12.3  | 1.5E-34  |
| P225H                          | D67N                          | 41           | 210    | 3751   | 0.01         | 0.03              | 0.00            | -12.0 | 3.5E-33  |
| Y181C                          | M184IV                        | 1161         | 1139   | 3893   | 0.19         | 0.24              | 0.00            | -11.4 | 4.8E-30  |
| V90I                           | L210W                         | 114          | 507    | 2975   | 0.03         | 0.06              | 0.00            | -9.7  | 2.2E-22  |
| K103N                          | D67N                          | 1690         | 2562   | 1983   | 0.27         | 0.32              | 0.01            | -8.8  | 1.0E-18  |
| Y188L                          | L74IV                         | 78           | 525    | 1920   | 0.03         | 0.06              | 0.00            | -8.6  | 9.8E-18  |
| A98G                           | L210W                         | 452          | 406    | 2471   | 0.14         | 0.09              | 0.01            | 8.3   | 1.1E-16  |
| E138A                          | L74V                          | 18           | 312    | 1424   | 0.01         | 0.03              | 0.00            | -8.3  | 1.2E-16  |
| A98G                           | M41L                          | 623          | 239    | 3740   | 0.14         | 0.09              | 0.01            | 8.0   | 9.0E-16  |
| G190A                          | D67N                          | 948          | 737    | 2725   | 0.21         | 0.17              | 0.01            | 8.0   | 1.8E-15  |
| V108I                          | L74IV                         | 317          | 502    | 1576   | 0.13         | 0.08              | 0.01            | 7.7   | 1.9E-14  |
| T139R                          | L74IV                         | 4            | 73     | 1993   | 0.00         | 0.01              | 0.00            | -7.5  | 4.4E-14  |
| P225H                          | V75MT                         | 4            | 252    | 604    | 0.00         | 0.02              | 0.00            | -7.4  | 1.8E-13  |
| Y188H                          | L210W                         | 1            | 22     | 2976   | 0.00         | 0.00              | 0.00            | -7.2  | 7.3E-13  |
| H221Y                          | K70R                          | 100          | 509    | 2094   | 0.04         | 0.06              | 0.00            | -7.0  | 1.8E-12  |
| K103N                          | L210W                         | 1321         | 2973   | 1532   | 0.23         | 0.26              | 0.01            | -6.9  | 4.4E-12  |
| K101H                          | K65R                          | 1            | 166    | 398    | 0.00         | 0.01              | 0.00            | -6.9  | 6.0E-12  |
| V90I                           | M41L                          | 217          | 390    | 4409   | 0.04         | 0.06              | 0.00            | -6.8  | 1.3E-11  |
| Y181C                          | K65R                          | 198          | 2189   | 189    | 0.08         | 0.04              | 0.01            | 6.7   | 2.0E-11  |
| V90I                           | T215Y                         | 160          | 427    | 3264   | 0.04         | 0.06              | 0.00            | -6.7  | 2.6E-11  |
| V90I                           | L74V                          | 53           | 559    | 1374   | 0.03         | 0.05              | 0.00            | -6.5  | 5.8E-11  |
| A98G                           | T215Y                         | 447          | 332    | 2795   | 0.13         | 0.09              | 0.01            | 6.5   | 7.0E-11  |
| P225H                          | T215F                         | 17           | 225    | 1359   | 0.01         | 0.03              | 0.00            | -6.5  | 9.3E-11  |
| V179D                          | T215Y                         | 60           | 203    | 3419   | 0.02         | 0.03              | 0.00            | -6.2  | 4.1E-10  |
| V108I                          | L210W                         | 412          | 454    | 2413   | 0.13         | 0.09              | 0.01            | 6.2   | 4.4E-10  |
| K103N                          | M41L                          | 2067         | 2211   | 2218   | 0.32         | 0.35              | 0.01            | -6.2  | 4.9E-10  |
| V179D                          | L210W                         | 51           | 226    | 3093   | 0.02         | 0.03              | 0.00            | -6.1  | 8.4E-10  |
| H221Y                          | T215F                         | 57           | 501    | 1296   | 0.03         | 0.06              | 0.00            | -6.1  | 1.1E-9   |
| A98G                           | D67N                          | 506          | 351    | 3238   | 0.12         | 0.09              | 0.01            | 6.1   | 1.2E-9   |
| A98G                           | Q151M                         | 16           | 865    | 361    | 0.01         | 0.03              | 0.00            | -6.0  | 1.7E-9   |
| G190A                          | T215F                         | 372          | 1198   | 959    | 0.15         | 0.10              | 0.01            | 6.0   | 1.9E-9   |
| G190A                          | L74IV                         | 510          | 1135   | 1424   | 0.17         | 0.13              | 0.01            | 5.8   | 5.2E-9   |

|       |        |      |      |      |      |      |      |      |        |
|-------|--------|------|------|------|------|------|------|------|--------|
| H221Y | Y115F  | 60   | 556  | 178  | 0.08 | 0.02 | 0.01 | 5.8  | 7.0E-9 |
| V108I | V75MT  | 114  | 754  | 461  | 0.09 | 0.04 | 0.01 | 5.4  | 7.2E-8 |
| V106M | L210W  | 23   | 114  | 2950 | 0.01 | 0.02 | 0.00 | -5.3 | 1.0E-7 |
| Y188H | M41L   | 3    | 20   | 4446 | 0.00 | 0.00 | 0.00 | -5.3 | 1.1E-7 |
| Y181C | Q151M  | 170  | 2235 | 198  | 0.07 | 0.04 | 0.00 | 5.3  | 1.2E-7 |
| K101E | D67N   | 413  | 288  | 3322 | 0.10 | 0.08 | 0.00 | 5.3  | 1.2E-7 |
| F227L | L210W  | 131  | 81   | 2803 | 0.04 | 0.02 | 0.00 | 5.2  | 2.0E-7 |
| Y181C | L210W  | 943  | 1422 | 1922 | 0.22 | 0.19 | 0.01 | 5.1  | 2.7E-7 |
| V106M | T215Y  | 28   | 101  | 3266 | 0.01 | 0.02 | 0.00 | -5.1 | 3.2E-7 |
| G190A | L210W  | 699  | 1004 | 2180 | 0.18 | 0.15 | 0.01 | 4.9  | 1.1E-6 |
| T139R | V75MT  | 1    | 82   | 609  | 0.00 | 0.01 | 0.00 | -4.9 | 1.2E-6 |
| G190A | V75MT  | 179  | 1545 | 405  | 0.08 | 0.06 | 0.01 | 4.8  | 1.8E-6 |
| V108I | M184IV | 623  | 222  | 4271 | 0.12 | 0.10 | 0.00 | 4.8  | 1.9E-6 |
| V108I | M41L   | 549  | 317  | 3685 | 0.12 | 0.10 | 0.00 | 4.7  | 2.4E-6 |
| V106I | T215F  | 32   | 315  | 1388 | 0.02 | 0.03 | 0.00 | -4.7 | 2.5E-6 |
| H221Y | V75MT  | 82   | 532  | 503  | 0.07 | 0.04 | 0.01 | 4.6  | 4.5E-6 |
| K103N | T215Y  | 1552 | 2415 | 1632 | 0.28 | 0.30 | 0.01 | -4.5 | 5.9E-6 |
| V90I  | K70R   | 219  | 395  | 2123 | 0.08 | 0.06 | 0.01 | 4.5  | 8.2E-6 |
| V106M | M41L   | 43   | 93   | 4404 | 0.01 | 0.02 | 0.00 | -4.4 | 8.7E-6 |
| A98G  | T215F  | 193  | 596  | 1163 | 0.10 | 0.07 | 0.01 | 4.4  | 9.0E-6 |
| K101P | Q151M  | 2    | 183  | 374  | 0.00 | 0.01 | 0.00 | -4.4 | 1.1E-5 |
| P225H | M184IV | 217  | 34   | 4872 | 0.04 | 0.03 | 0.00 | 4.4  | 1.1E-5 |
| V108I | Q151M  | 73   | 805  | 280  | 0.06 | 0.03 | 0.01 | 4.4  | 1.1E-5 |
| G190A | Q151M  | 120  | 1623 | 242  | 0.06 | 0.04 | 0.01 | 4.4  | 1.3E-5 |
| P225H | L74IV  | 36   | 212  | 1954 | 0.02 | 0.03 | 0.00 | -4.3 | 1.7E-5 |
| Y181C | K70R   | 712  | 1631 | 1452 | 0.19 | 0.16 | 0.01 | 4.3  | 1.7E-5 |
| V179D | D67N   | 84   | 193  | 3951 | 0.02 | 0.03 | 0.00 | -4.3 | 1.8E-5 |
| V179D | M41L   | 102  | 181  | 4611 | 0.02 | 0.03 | 0.00 | -4.3 | 1.9E-5 |
| Y181C | Y115F  | 115  | 2273 | 134  | 0.05 | 0.03 | 0.00 | 4.3  | 2.0E-5 |
| F227L | T215Y  | 127  | 68   | 3134 | 0.04 | 0.02 | 0.00 | 4.2  | 2.8E-5 |
| Y181C | T215F  | 463  | 1753 | 869  | 0.15 | 0.12 | 0.01 | 4.2  | 2.9E-5 |
| G190A | M41L   | 996  | 711  | 3314 | 0.20 | 0.18 | 0.01 | 4.1  | 4.2E-5 |
| M230L | D67N   | 27   | 78   | 3784 | 0.01 | 0.01 | 0.00 | -4.1 | 4.5E-5 |
| Y188L | L210W  | 276  | 337  | 2703 | 0.08 | 0.06 | 0.00 | 4.0  | 5.7E-5 |
| Y188L | T215Y  | 297  | 260  | 3000 | 0.08 | 0.07 | 0.00 | 4.0  | 6.7E-5 |
| Y181C | D67N   | 1160 | 1189 | 2514 | 0.24 | 0.21 | 0.01 | 4.0  | 6.7E-5 |
| V106A | T215F  | 13   | 140  | 1361 | 0.01 | 0.02 | 0.00 | -3.9 | 8.9E-5 |
| H221Y | L74IV  | 189  | 392  | 1717 | 0.08 | 0.06 | 0.01 | 3.9  | 1.0E-4 |
| K101H | L210W  | 94   | 71   | 2873 | 0.03 | 0.02 | 0.00 | 3.9  | 1.1E-4 |
| V108I | T215Y  | 392  | 379  | 2763 | 0.11 | 0.09 | 0.01 | 3.8  | 1.3E-4 |
| E138A | L74I   | 11   | 324  | 632  | 0.01 | 0.02 | 0.00 | -3.8 | 1.5E-4 |
| F227L | K70R   | 35   | 176  | 2198 | 0.01 | 0.02 | 0.00 | -3.8 | 1.6E-4 |



|       |        |      |      |      |      |      |      |      |        |
|-------|--------|------|------|------|------|------|------|------|--------|
| Y188L | M41L   | 391  | 225  | 4059 | 0.08 | 0.07 | 0.00 | 3.8  | 1.6E-4 |
| F227L | M41L   | 154  | 55   | 4246 | 0.03 | 0.02 | 0.00 | 3.7  | 1.9E-4 |
| V106A | Q151M  | 2    | 162  | 374  | 0.00 | 0.01 | 0.00 | -3.7 | 1.9E-4 |
| V106I | K70R   | 66   | 299  | 2308 | 0.02 | 0.04 | 0.00 | -3.7 | 2.2E-4 |
| E138A | D67N   | 106  | 219  | 3925 | 0.02 | 0.03 | 0.00 | -3.7 | 2.4E-4 |
| K103N | Q151M  | 152  | 4246 | 217  | 0.03 | 0.04 | 0.00 | -3.6 | 2.9E-4 |
| M230L | Q151M  | 1    | 104  | 375  | 0.00 | 0.01 | 0.00 | -3.6 | 3.5E-4 |
| G190A | K70R   | 512  | 1180 | 1641 | 0.15 | 0.13 | 0.01 | 3.5  | 4.2E-4 |
| H221Y | K65R   | 51   | 564  | 320  | 0.05 | 0.03 | 0.01 | 3.5  | 5.2E-4 |
| K101E | V75MT  | 80   | 641  | 520  | 0.06 | 0.04 | 0.01 | 3.5  | 5.3E-4 |
| V106M | K65R   | 22   | 114  | 376  | 0.04 | 0.01 | 0.01 | 3.5  | 5.4E-4 |
| K223T | L210W  | 42   | 15   | 2926 | 0.01 | 0.01 | 0.00 | 3.4  | 6.0E-4 |
| L100I | M184IV | 291  | 259  | 4849 | 0.05 | 0.06 | 0.00 | -3.4 | 6.3E-4 |
| M230L | K70R   | 15   | 89   | 2231 | 0.01 | 0.01 | 0.00 | -3.4 | 7.7E-4 |
| Y188C | M184IV | 3    | 11   | 5183 | 0.00 | 0.00 | 0.00 | -3.4 | 7.9E-4 |
| L100I | L210W  | 246  | 320  | 2697 | 0.08 | 0.06 | 0.00 | 3.3  | 9.6E-4 |
| K103N | V75MT  | 260  | 4105 | 328  | 0.06 | 0.07 | 0.00 | -3.3 | 9.9E-4 |
| A98G  | Y115F  | 14   | 866  | 237  | 0.01 | 0.02 | 0.00 | -3.3 | 9.9E-4 |
| G190S | L74IV  | 104  | 192  | 1876 | 0.05 | 0.03 | 0.00 | 3.3  | 1.0E-3 |
| K101H | M41L   | 123  | 44   | 4307 | 0.03 | 0.02 | 0.00 | 3.3  | 1.0E-3 |
| K101P | K65R   | 3    | 181  | 397  | 0.01 | 0.01 | 0.00 | -3.3 | 1.0E-3 |
| Y181C | M41L   | 1321 | 1045 | 2969 | 0.25 | 0.23 | 0.01 | 3.3  | 1.1E-3 |
| Y188H | D67N   | 4    | 19   | 3797 | 0.00 | 0.00 | 0.00 | -3.3 | 1.1E-3 |
| K103N | T215F  | 632  | 3334 | 703  | 0.14 | 0.15 | 0.01 | -3.3 | 1.1E-3 |
| I94L  | V75MT  | 17   | 37   | 588  | 0.03 | 0.01 | 0.01 | 3.2  | 1.2E-3 |
| G190E | M184IV | 13   | 26   | 5173 | 0.00 | 0.00 | 0.00 | -3.2 | 1.5E-3 |
| L100I | M41L   | 350  | 216  | 4043 | 0.08 | 0.06 | 0.00 | 3.1  | 1.7E-3 |
| G190E | L74IV  | 25   | 14   | 1974 | 0.01 | 0.00 | 0.00 | 3.1  | 1.7E-3 |
| Y188C | D67N   | 2    | 12   | 3810 | 0.00 | 0.00 | 0.00 | -3.1 | 1.8E-3 |
| F227L | D67N   | 127  | 80   | 3643 | 0.03 | 0.02 | 0.00 | 3.0  | 2.4E-3 |
| I94L  | D67N   | 45   | 10   | 3751 | 0.01 | 0.01 | 0.00 | 3.0  | 2.5E-3 |
| A98G  | M184IV | 586  | 256  | 4501 | 0.11 | 0.10 | 0.00 | 3.0  | 2.6E-3 |
| E138Q | T215F  | 4    | 52   | 1371 | 0.00 | 0.01 | 0.00 | -3.0 | 2.7E-3 |
| K103N | Y115F  | 101  | 4281 | 146  | 0.02 | 0.03 | 0.00 | -3.0 | 2.8E-3 |
| V106M | L74IV  | 19   | 110  | 1979 | 0.01 | 0.02 | 0.00 | -3.0 | 2.9E-3 |
| V108I | D67N   | 445  | 417  | 3178 | 0.11 | 0.10 | 0.00 | 3.0  | 3.0E-3 |
| G190Q | L74IV  | 21   | 10   | 1978 | 0.01 | 0.00 | 0.00 | 3.0  | 3.1E-3 |
| V90I  | L74I   | 28   | 588  | 606  | 0.02 | 0.04 | 0.00 | -3.0 | 3.1E-3 |
| K101H | T215Y  | 88   | 57   | 3194 | 0.03 | 0.02 | 0.00 | 3.0  | 3.1E-3 |
| K223T | T215Y  | 40   | 12   | 3240 | 0.01 | 0.01 | 0.00 | 2.9  | 3.7E-3 |
| F227L | L74IV  | 75   | 134  | 1896 | 0.04 | 0.02 | 0.00 | 2.9  | 3.8E-3 |
| V106I | L74I   | 15   | 354  | 621  | 0.02 | 0.03 | 0.00 | -2.9 | 4.0E-3 |

|       |        |      |      |      |      |      |      |      |        |
|-------|--------|------|------|------|------|------|------|------|--------|
| T139R | K65R   | 1    | 81   | 399  | 0.00 | 0.01 | 0.00 | -2.9 | 4.1E-3 |
| T139R | L210W  | 17   | 64   | 2961 | 0.01 | 0.01 | 0.00 | -2.8 | 4.5E-3 |
| A98G  | K70R   | 269  | 590  | 1933 | 0.10 | 0.08 | 0.01 | 2.8  | 5.3E-3 |
| V106I | L74V   | 41   | 326  | 1390 | 0.02 | 0.03 | 0.00 | -2.8 | 5.4E-3 |
| A98G  | V75MT  | 86   | 782  | 517  | 0.06 | 0.04 | 0.01 | 2.8  | 5.5E-3 |
| K101E | L74IV  | 209  | 494  | 1762 | 0.08 | 0.07 | 0.01 | 2.8  | 5.8E-3 |
| V106A | K70R   | 28   | 131  | 2209 | 0.01 | 0.02 | 0.00 | -2.8 | 5.8E-3 |
| K101P | T215Y  | 95   | 69   | 3191 | 0.03 | 0.02 | 0.00 | 2.8  | 5.8E-3 |
| F227L | T215F  | 22   | 173  | 1351 | 0.01 | 0.02 | 0.00 | -2.7 | 6.0E-3 |
| V106I | L210W  | 156  | 214  | 2939 | 0.05 | 0.04 | 0.00 | 2.7  | 6.0E-3 |
| G190S | M184IV | 153  | 144  | 5015 | 0.03 | 0.04 | 0.00 | -2.7 | 6.2E-3 |
| K238T | K70R   | 90   | 155  | 2114 | 0.04 | 0.03 | 0.00 | 2.7  | 6.2E-3 |
| K101P | M41L   | 124  | 56   | 4307 | 0.03 | 0.02 | 0.00 | 2.7  | 6.4E-3 |
| V108I | Y115F  | 43   | 832  | 199  | 0.04 | 0.02 | 0.01 | 2.7  | 6.6E-3 |
| Y188L | Y115F  | 10   | 612  | 242  | 0.01 | 0.02 | 0.00 | -2.7 | 6.6E-3 |
| I94L  | M41L   | 47   | 8    | 4388 | 0.01 | 0.01 | 0.00 | 2.7  | 7.6E-3 |
| P236L | L74IV  | 1    | 14   | 1997 | 0.00 | 0.00 | 0.00 | -2.7 | 7.6E-3 |
| G190S | T215F  | 71   | 210  | 1305 | 0.04 | 0.03 | 0.01 | 2.7  | 7.6E-3 |
| F227L | V75MT  | 29   | 185  | 573  | 0.04 | 0.02 | 0.01 | 2.7  | 7.7E-3 |
| K101E | L210W  | 292  | 424  | 2633 | 0.09 | 0.07 | 0.00 | 2.6  | 8.1E-3 |
| T139R | Q151M  | 1    | 82   | 375  | 0.00 | 0.01 | 0.00 | -2.6 | 8.3E-3 |
| K223T | M41L   | 48   | 9    | 4385 | 0.01 | 0.01 | 0.00 | 2.6  | 8.4E-3 |
| T139R | D67N   | 23   | 55   | 3782 | 0.01 | 0.01 | 0.00 | -2.6 | 8.7E-3 |
| I94L  | L210W  | 34   | 20   | 2935 | 0.01 | 0.01 | 0.00 | 2.6  | 8.9E-3 |
| L100I | T215Y  | 253  | 258  | 2999 | 0.07 | 0.06 | 0.00 | 2.6  | 9.2E-3 |
| V106A | D67N   | 96   | 61   | 3699 | 0.02 | 0.02 | 0.00 | 2.6  | 9.3E-3 |
| G190Q | V75MT  | 11   | 24   | 598  | 0.02 | 0.00 | 0.01 | 2.6  | 9.3E-3 |
| Y181I | Q151M  | 15   | 105  | 361  | 0.03 | 0.01 | 0.01 | 2.6  | 9.6E-3 |
| E138Q | K70R   | 9    | 53   | 2222 | 0.00 | 0.01 | 0.00 | -2.6 | 0.01   |
| K103S | T215F  | 44   | 112  | 1324 | 0.03 | 0.02 | 0.00 | 2.6  | 0.01   |
| V90I  | T215F  | 125  | 467  | 1284 | 0.07 | 0.05 | 0.01 | 2.6  | 0.01   |
| K223T | D67N   | 43   | 15   | 3751 | 0.01 | 0.01 | 0.00 | 2.6  | 0.01   |
| Y181C | V75MT  | 203  | 2183 | 389  | 0.07 | 0.06 | 0.00 | 2.6  | 0.01   |
| K103N | M184IV | 2715 | 1509 | 2319 | 0.41 | 0.40 | 0.01 | 2.6  | 0.01   |
| G190E | M41L   | 13   | 29   | 4439 | 0.00 | 0.00 | 0.00 | -2.6 | 0.01   |
| L100I | V75MT  | 59   | 511  | 545  | 0.05 | 0.04 | 0.01 | 2.5  | 0.01   |
| V179D | L74V   | 30   | 245  | 1416 | 0.02 | 0.03 | 0.00 | -2.5 | 0.01   |
| Q242L | L210W  | 24   | 9    | 2951 | 0.01 | 0.00 | 0.00 | 2.5  | 0.01   |
| K101H | Q151M  | 3    | 165  | 372  | 0.01 | 0.01 | 0.00 | -2.5 | 0.01   |
| Y188C | M41L   | 3    | 11   | 4451 | 0.00 | 0.00 | 0.00 | -2.5 | 0.01   |
| K101P | L74IV  | 62   | 112  | 1930 | 0.03 | 0.02 | 0.00 | 2.5  | 0.01   |
| H221C | K70R   | 0    | 14   | 2248 | 0.00 | 0.00 | 0.00 | NA   | 0.01   |

|       |        |      |      |      |      |      |      |      |      |
|-------|--------|------|------|------|------|------|------|------|------|
| Y181C | T215Y  | 984  | 1221 | 2202 | 0.22 | 0.21 | 0.01 | 2.5  | 0.01 |
| K238T | Y115F  | 3    | 246  | 246  | 0.01 | 0.01 | 0.00 | -2.5 | 0.01 |
| I178F | L210W  | 19   | 5    | 2956 | 0.01 | 0.00 | 0.00 | 2.5  | 0.01 |
| Y188H | L74IV  | 2    | 20   | 1996 | 0.00 | 0.00 | 0.00 | -2.4 | 0.02 |
| V241M | K70R   | 1    | 12   | 2244 | 0.00 | 0.00 | 0.00 | -2.4 | 0.02 |
| K238T | D67N   | 134  | 102  | 3626 | 0.03 | 0.03 | 0.00 | 2.4  | 0.02 |
| Q242L | M41L   | 31   | 3    | 4413 | 0.01 | 0.00 | 0.00 | 2.4  | 0.02 |
| T139R | M184IV | 70   | 11   | 5096 | 0.01 | 0.01 | 0.00 | 2.4  | 0.02 |
| H221Y | Q151M  | 41   | 578  | 319  | 0.04 | 0.03 | 0.01 | 2.4  | 0.02 |
| K223T | L74IV  | 25   | 29   | 1963 | 0.01 | 0.01 | 0.00 | 2.3  | 0.02 |
| Y188C | L74IV  | 0    | 14   | 1999 | 0.00 | 0.00 | 0.00 | NA   | 0.02 |
| K103N | K70E   | 7    | 4377 | 18   | 0.00 | 0.00 | 0.00 | -2.3 | 0.02 |
| G190A | M184IV | 995  | 678  | 4054 | 0.17 | 0.19 | 0.01 | -2.3 | 0.02 |
| P225H | K70R   | 52   | 200  | 2171 | 0.02 | 0.03 | 0.00 | -2.2 | 0.02 |
| H221Y | K70E   | 8    | 607  | 15   | 0.01 | 0.00 | 0.00 | 2.2  | 0.03 |
| V106I | Q151M  | 9    | 366  | 380  | 0.01 | 0.02 | 0.00 | -2.2 | 0.03 |
| A98G  | L74IV  | 228  | 582  | 1739 | 0.09 | 0.08 | 0.01 | 2.2  | 0.03 |
| E138Q | T215Y  | 37   | 19   | 3243 | 0.01 | 0.01 | 0.00 | 2.2  | 0.03 |
| Y188C | K65R   | 6    | 8    | 395  | 0.01 | 0.00 | 0.01 | 2.2  | 0.03 |
| E138Q | L74IV  | 9    | 54   | 1981 | 0.00 | 0.01 | 0.00 | -2.2 | 0.03 |
| S105T | K70R   | 2    | 17   | 2245 | 0.00 | 0.00 | 0.00 | -2.2 | 0.03 |
| V179F | L74IV  | 13   | 8    | 1979 | 0.01 | 0.00 | 0.00 | 2.2  | 0.03 |
| S105T | T215F  | 0    | 18   | 1381 | 0.00 | 0.00 | 0.00 | NA   | 0.03 |
| E138A | T215F  | 38   | 268  | 1396 | 0.02 | 0.03 | 0.00 | -2.2 | 0.03 |
| H221C | L74IV  | 10   | 3    | 1985 | 0.01 | 0.00 | 0.00 | 2.2  | 0.03 |
| K103N | K65R   | 174  | 4190 | 209  | 0.04 | 0.04 | 0.00 | -2.2 | 0.03 |
| E138A | M41L   | 142  | 187  | 4572 | 0.03 | 0.03 | 0.00 | -2.1 | 0.03 |
| K238T | L74IV  | 44   | 189  | 1945 | 0.02 | 0.03 | 0.00 | -2.1 | 0.03 |
| K101E | T215Y  | 315  | 350  | 2928 | 0.09 | 0.08 | 0.00 | 2.1  | 0.03 |
| Y188C | L210W  | 2    | 12   | 2980 | 0.00 | 0.00 | 0.00 | -2.1 | 0.03 |
| E138A | T215Y  | 103  | 203  | 3379 | 0.03 | 0.03 | 0.00 | -2.1 | 0.03 |
| E138A | Q151M  | 8    | 327  | 384  | 0.01 | 0.02 | 0.00 | -2.1 | 0.04 |
| Y188L | K65R   | 20   | 607  | 379  | 0.02 | 0.03 | 0.00 | -2.1 | 0.04 |
| Y232H | T215F  | 0    | 17   | 1380 | 0.00 | 0.00 | 0.00 | NA   | 0.04 |
| K103N | K70R   | 1091 | 3179 | 1082 | 0.20 | 0.22 | 0.01 | -2.1 | 0.04 |
| Y188L | D67N   | 312  | 303  | 3493 | 0.08 | 0.07 | 0.00 | 2.1  | 0.04 |
| K238T | Q151M  | 6    | 244  | 366  | 0.01 | 0.02 | 0.00 | -2.1 | 0.04 |
| E138A | L210W  | 93   | 238  | 3049 | 0.03 | 0.03 | 0.00 | -2.1 | 0.04 |
| K103S | D67N   | 99   | 75   | 3677 | 0.03 | 0.02 | 0.00 | 2.1  | 0.04 |
| K101H | D67N   | 93   | 70   | 3696 | 0.02 | 0.02 | 0.00 | 2.0  | 0.04 |
| V179T | V75M.T | 35   | 0    | 6242 | 0.01 | 0.00 | 0.00 | 2.0  | 0.04 |
| K103H | L74IV  | 10   | 5    | 1986 | 0.00 | 0.00 | 0.00 | 2.0  | 0.04 |

|       |         |     |      |      |      |      |      |      |      |
|-------|---------|-----|------|------|------|------|------|------|------|
| K238T | V75MT   | 11  | 236  | 592  | 0.01 | 0.02 | 0.00 | -2.0 | 0.04 |
| Y232H | M41L    | 5   | 13   | 4450 | 0.00 | 0.00 | 0.00 | -2.0 | 0.04 |
| M230L | Y115F   | 0   | 105  | 252  | 0.00 | 0.01 | 0.00 | NA   | 0.04 |
| V90I  | M184V.I | 629 | 0    | 8024 | 0.07 | 0.07 | 0.00 | 2.0  | 0.05 |
| Y181I | K70R    | 43  | 70   | 2202 | 0.02 | 0.01 | 0.00 | 2.0  | 0.05 |
| G190A | T215Y   | 709 | 871  | 2499 | 0.17 | 0.16 | 0.01 | 1.9  | 0.05 |
| K101P | L210W   | 80  | 100  | 2888 | 0.03 | 0.02 | 0.00 | 1.9  | 0.06 |
| K238N | V75MT   | 1   | 40   | 608  | 0.00 | 0.00 | 0.00 | -1.9 | 0.06 |
| G190S | D67N    | 159 | 143  | 3622 | 0.04 | 0.03 | 0.00 | 1.9  | 0.06 |
| G190A | Y115F   | 66  | 1672 | 181  | 0.03 | 0.03 | 0.00 | 1.9  | 0.06 |
| A98G  | T69S_SS | 7   | 874  | 13   | 0.01 | 0.00 | 0.00 | 1.9  | 0.06 |
| V108I | K65R    | 31  | 842  | 354  | 0.03 | 0.03 | 0.00 | -1.9 | 0.06 |
| Y181I | T215F   | 29  | 79   | 1351 | 0.02 | 0.01 | 0.00 | 1.9  | 0.06 |
| Y181I | Y115F   | 9   | 111  | 243  | 0.02 | 0.01 | 0.01 | 1.9  | 0.06 |
| K238T | K65R    | 7   | 241  | 391  | 0.01 | 0.02 | 0.00 | -1.8 | 0.06 |
| V106A | T215Y   | 80  | 72   | 3201 | 0.02 | 0.02 | 0.00 | 1.8  | 0.07 |
| L100I | T215F   | 107 | 403  | 1254 | 0.06 | 0.05 | 0.01 | 1.8  | 0.07 |
| K101H | M184IV  | 121 | 42   | 5040 | 0.02 | 0.02 | 0.00 | 1.8  | 0.07 |
| Y188L | T215F   | 117 | 448  | 1258 | 0.06 | 0.05 | 0.01 | 1.8  | 0.07 |
| E138Q | L210W   | 32  | 31   | 2929 | 0.01 | 0.01 | 0.00 | 1.8  | 0.07 |
| I178F | K70R    | 3   | 20   | 2244 | 0.00 | 0.00 | 0.00 | -1.8 | 0.08 |
| Y232H | L210W   | 3   | 14   | 2979 | 0.00 | 0.00 | 0.00 | -1.8 | 0.08 |
| M230L | M41L    | 43  | 60   | 4411 | 0.01 | 0.01 | 0.00 | -1.8 | 0.08 |
| Q242L | V75MT   | 7   | 27   | 601  | 0.01 | 0.00 | 0.00 | 1.7  | 0.08 |
| K103H | L210W   | 11  | 4    | 2967 | 0.00 | 0.00 | 0.00 | 1.7  | 0.08 |
| K103S | M184IV  | 128 | 47   | 5019 | 0.02 | 0.02 | 0.00 | 1.7  | 0.08 |
| M230L | V75MT   | 4   | 100  | 605  | 0.01 | 0.01 | 0.00 | -1.7 | 0.08 |
| K101P | D67N    | 99  | 83   | 3691 | 0.03 | 0.02 | 0.00 | 1.7  | 0.09 |
| V179D | K65R    | 20  | 260  | 405  | 0.03 | 0.02 | 0.01 | 1.7  | 0.09 |
| I94L  | T215Y   | 29  | 18   | 3261 | 0.01 | 0.01 | 0.00 | 1.7  | 0.09 |
| Q242L | K70R    | 5   | 28   | 2237 | 0.00 | 0.00 | 0.00 | -1.7 | 0.09 |
| G190E | K65R    | 6   | 35   | 395  | 0.01 | 0.00 | 0.01 | 1.7  | 0.09 |
| F227Y | L74IV   | 9   | 7    | 1981 | 0.00 | 0.00 | 0.00 | 1.7  | 0.09 |
| D237E | L210W   | 52  | 62   | 2909 | 0.02 | 0.01 | 0.00 | 1.7  | 0.09 |
| Q242L | T215Y   | 18  | 8    | 3274 | 0.01 | 0.00 | 0.00 | 1.7  | 0.09 |
| Y188C | T215Y   | 3   | 11   | 3295 | 0.00 | 0.00 | 0.00 | -1.7 | 0.09 |
| K103S | V75MT   | 20  | 160  | 582  | 0.03 | 0.02 | 0.01 | 1.7  | 0.09 |
| K101E | Q151M   | 42  | 688  | 328  | 0.04 | 0.03 | 0.01 | 1.7  | 0.10 |
| I178F | M41L    | 20  | 4    | 4429 | 0.00 | 0.00 | 0.00 | 1.7  | 0.10 |
| K223T | K70R    | 10  | 47   | 2229 | 0.00 | 0.01 | 0.00 | -1.7 | 0.10 |
| K102N | V75MT   | 7   | 31   | 601  | 0.01 | 0.00 | 0.00 | 1.7  | 0.10 |
| Y188H | K70R    | 3   | 19   | 2233 | 0.00 | 0.00 | 0.00 | -1.6 | 0.10 |

|       |         |     |     |      |      |      |      |      |      |
|-------|---------|-----|-----|------|------|------|------|------|------|
| K223T | K65R    | 1   | 57  | 399  | 0.00 | 0.01 | 0.00 | -1.6 | 0.10 |
| Y188L | M184IV  | 345 | 252 | 4834 | 0.06 | 0.07 | 0.00 | -1.6 | 0.10 |
| K103S | K70R    | 58  | 114 | 2171 | 0.02 | 0.02 | 0.00 | 1.6  | 0.10 |
| V179D | Y115F   | 14  | 267 | 258  | 0.03 | 0.01 | 0.01 | 1.6  | 0.11 |
| L234I | L74IV   | 11  | 12  | 1988 | 0.01 | 0.00 | 0.00 | 1.6  | 0.11 |
| H221C | L210W   | 10  | 4   | 2967 | 0.00 | 0.00 | 0.00 | 1.6  | 0.11 |
| F227L | K65R    | 6   | 208 | 390  | 0.01 | 0.02 | 0.00 | -1.6 | 0.11 |
| K101E | K70E    | 6   | 724 | 19   | 0.01 | 0.00 | 0.00 | 1.6  | 0.11 |
| H221C | T215Y   | 9   | 1   | 3286 | 0.00 | 0.00 | 0.00 | 1.6  | 0.11 |
| I94L  | K65R    | 1   | 54  | 400  | 0.00 | 0.01 | 0.00 | -1.6 | 0.11 |
| V179F | M184IV  | 7   | 11  | 5176 | 0.00 | 0.00 | 0.00 | -1.6 | 0.11 |
| D237E | K70R    | 23  | 91  | 2214 | 0.01 | 0.01 | 0.00 | -1.6 | 0.11 |
| I178F | T215Y   | 15  | 6   | 3279 | 0.00 | 0.00 | 0.00 | 1.6  | 0.11 |
| Q242L | D67N    | 10  | 23  | 3798 | 0.00 | 0.00 | 0.00 | -1.6 | 0.12 |
| H221C | M41L    | 13  | 1   | 4435 | 0.00 | 0.00 | 0.00 | 1.6  | 0.12 |
| M230L | L74IV   | 34  | 69  | 1963 | 0.02 | 0.01 | 0.00 | 1.6  | 0.12 |
| V179D | L74I    | 27  | 251 | 614  | 0.03 | 0.02 | 0.01 | 1.5  | 0.12 |
| L100I | D67N    | 281 | 285 | 3489 | 0.07 | 0.06 | 0.00 | 1.5  | 0.12 |
| V179F | Q151M   | 4   | 18  | 371  | 0.01 | 0.00 | 0.01 | 1.5  | 0.12 |
| V106A | L74IV   | 31  | 129 | 1964 | 0.01 | 0.02 | 0.00 | -1.5 | 0.13 |
| F227Y | T215Y   | 12  | 4   | 3280 | 0.00 | 0.00 | 0.00 | 1.5  | 0.13 |
| F227Y | L210W   | 11  | 6   | 2963 | 0.00 | 0.00 | 0.00 | 1.5  | 0.13 |
| S105T | T215Y   | 13  | 5   | 3282 | 0.00 | 0.00 | 0.00 | 1.5  | 0.13 |
| G190E | T215Y   | 11  | 27  | 3286 | 0.00 | 0.00 | 0.00 | -1.5 | 0.13 |
| V179T | L74V    | 10  | 23  | 1434 | 0.01 | 0.00 | 0.00 | 1.5  | 0.13 |
| I178F | D67N    | 17  | 7   | 3793 | 0.00 | 0.00 | 0.00 | 1.5  | 0.13 |
| G190C | T215F   | 6   | 7   | 1374 | 0.00 | 0.00 | 0.00 | 1.5  | 0.13 |
| L234I | V75MT   | 5   | 18  | 605  | 0.01 | 0.00 | 0.00 | 1.5  | 0.13 |
| V106M | V75MT   | 6   | 130 | 601  | 0.01 | 0.01 | 0.00 | -1.5 | 0.14 |
| L100I | Q151M   | 19  | 557 | 356  | 0.02 | 0.03 | 0.00 | -1.5 | 0.14 |
| K238N | L74IV   | 15  | 23  | 1976 | 0.01 | 0.00 | 0.00 | 1.5  | 0.14 |
| K238N | K65R    | 0   | 41  | 399  | 0.00 | 0.00 | 0.00 | NA   | 0.14 |
| V106I | M184V.I | 376 | 0   | 8379 | 0.04 | 0.04 | 0.00 | 1.5  | 0.14 |
| F227Y | D67N    | 13  | 4   | 3794 | 0.00 | 0.00 | 0.00 | 1.5  | 0.14 |
| Y188C | T215F   | 1   | 13  | 1380 | 0.00 | 0.00 | 0.00 | -1.5 | 0.14 |
| I94L  | L74IV   | 19  | 33  | 1972 | 0.01 | 0.01 | 0.00 | 1.5  | 0.14 |
| H221C | T215F   | 0   | 10  | 1380 | 0.00 | 0.00 | 0.00 | NA   | 0.14 |
| T139R | Y115F   | 1   | 82  | 251  | 0.00 | 0.01 | 0.00 | -1.5 | 0.14 |
| Y181V | L74IV   | 22  | 40  | 1977 | 0.01 | 0.01 | 0.00 | 1.5  | 0.15 |
| E138Q | M41L    | 42  | 20  | 4390 | 0.01 | 0.01 | 0.00 | 1.4  | 0.15 |
| E138Q | Y115F   | 0   | 64  | 251  | 0.00 | 0.01 | 0.00 | NA   | 0.15 |
| G190S | V75MT   | 29  | 276 | 573  | 0.03 | 0.02 | 0.01 | 1.4  | 0.15 |

|       |         |     |      |      |      |      |      |      |      |
|-------|---------|-----|------|------|------|------|------|------|------|
| V179T | T69S_SS | 0   | 35   | 23   | 0.00 | 0.00 | 0.00 | NA   | 0.15 |
| Y188L | K70E    | 0   | 626  | 25   | 0.00 | 0.00 | 0.00 | NA   | 0.15 |
| K101N | T215F   | 3   | 28   | 1374 | 0.00 | 0.00 | 0.00 | -1.4 | 0.15 |
| V106I | T215Y   | 155 | 187  | 3292 | 0.04 | 0.04 | 0.00 | 1.4  | 0.15 |
| D237E | K65R    | 3   | 113  | 396  | 0.01 | 0.01 | 0.00 | -1.4 | 0.15 |
| K101E | K65R    | 27  | 703  | 366  | 0.02 | 0.03 | 0.00 | -1.4 | 0.15 |
| P236L | K70R    | 2   | 13   | 2246 | 0.00 | 0.00 | 0.00 | -1.4 | 0.15 |
| K101P | Y115F   | 3   | 182  | 249  | 0.01 | 0.01 | 0.00 | -1.4 | 0.16 |
| V108I | K70E    | 6   | 870  | 18   | 0.01 | 0.00 | 0.00 | 1.4  | 0.16 |
| P236L | L210W   | 10  | 6    | 2971 | 0.00 | 0.00 | 0.00 | 1.4  | 0.16 |
| K102N | T215F   | 11  | 25   | 1367 | 0.01 | 0.00 | 0.00 | 1.4  | 0.16 |
| K238N | Q151M   | 0   | 41   | 376  | 0.00 | 0.00 | 0.00 | NA   | 0.16 |
| G190E | Y115F   | 4   | 38   | 248  | 0.01 | 0.00 | 0.01 | 1.4  | 0.16 |
| S105T | Y115F   | 3   | 16   | 249  | 0.01 | 0.00 | 0.01 | 1.4  | 0.16 |
| T139R | M41L    | 34  | 46   | 4412 | 0.01 | 0.01 | 0.00 | -1.4 | 0.16 |
| G190E | K70R    | 7   | 33   | 2240 | 0.00 | 0.00 | 0.00 | -1.4 | 0.16 |
| Y181C | K70E    | 12  | 2384 | 13   | 0.00 | 0.00 | 0.00 | 1.4  | 0.16 |
| V179T | T215F   | 10  | 24   | 1427 | 0.01 | 0.00 | 0.00 | 1.4  | 0.17 |
| V179F | Y115F   | 3   | 19   | 249  | 0.01 | 0.00 | 0.01 | 1.4  | 0.17 |
| Y181I | T215Y   | 37  | 71   | 3257 | 0.01 | 0.01 | 0.00 | -1.4 | 0.17 |
| F227L | Q151M   | 6   | 207  | 369  | 0.01 | 0.02 | 0.00 | -1.4 | 0.17 |
| I94L  | T215F   | 13  | 33   | 1358 | 0.01 | 0.01 | 0.00 | 1.4  | 0.17 |
| F227Y | M41L    | 14  | 3    | 4433 | 0.00 | 0.00 | 0.00 | 1.4  | 0.17 |
| L234I | T215F   | 2   | 20   | 1378 | 0.00 | 0.00 | 0.00 | -1.4 | 0.17 |
| D237E | V75MT   | 13  | 101  | 593  | 0.02 | 0.01 | 0.01 | 1.4  | 0.17 |
| G190Q | L210W   | 18  | 17   | 2961 | 0.01 | 0.00 | 0.00 | 1.4  | 0.18 |
| V179F | L210W   | 12  | 9    | 2957 | 0.00 | 0.00 | 0.00 | 1.3  | 0.18 |
| K223T | Y115F   | 0   | 58   | 252  | 0.00 | 0.01 | 0.00 | NA   | 0.18 |
| G190E | T215F   | 4   | 34   | 1377 | 0.00 | 0.00 | 0.00 | -1.3 | 0.18 |
| Y181I | D67N    | 63  | 53   | 3748 | 0.02 | 0.01 | 0.00 | 1.3  | 0.18 |
| Y188H | V75MT   | 0   | 23   | 609  | 0.00 | 0.00 | 0.00 | NA   | 0.18 |
| S105T | L210W   | 11  | 8    | 2967 | 0.00 | 0.00 | 0.00 | 1.3  | 0.18 |
| G190S | Y115F   | 14  | 296  | 237  | 0.03 | 0.02 | 0.01 | 1.3  | 0.18 |
| G190S | T69S_SS | 3   | 308  | 17   | 0.01 | 0.00 | 0.01 | 1.3  | 0.18 |
| Q242L | L74IV   | 11  | 16   | 1985 | 0.01 | 0.00 | 0.00 | 1.3  | 0.19 |
| Y188H | T215F   | 2   | 20   | 1371 | 0.00 | 0.00 | 0.00 | -1.3 | 0.19 |
| V179T | K70E    | 0   | 35   | 26   | 0.00 | 0.00 | 0.00 | NA   | 0.19 |
| L100I | K65R    | 34  | 539  | 360  | 0.04 | 0.03 | 0.01 | 1.3  | 0.19 |
| M230L | M184IV  | 76  | 28   | 5101 | 0.01 | 0.01 | 0.00 | 1.3  | 0.19 |
| T139R | T215Y   | 26  | 51   | 3271 | 0.01 | 0.01 | 0.00 | -1.3 | 0.19 |
| V106I | M41L    | 202 | 164  | 4451 | 0.04 | 0.04 | 0.00 | 1.3  | 0.19 |
| Q242L | K65R    | 0   | 34   | 401  | 0.00 | 0.00 | 0.00 | NA   | 0.20 |

|       |         |     |     |      |      |      |      |      |      |
|-------|---------|-----|-----|------|------|------|------|------|------|
| K101E | T215F   | 131 | 537 | 1221 | 0.07 | 0.06 | 0.01 | 1.3  | 0.20 |
| Y188L | V75MT   | 37  | 585 | 572  | 0.03 | 0.04 | 0.01 | -1.3 | 0.20 |
| K101H | V75MT   | 17  | 150 | 590  | 0.02 | 0.02 | 0.01 | 1.3  | 0.21 |
| I94L  | K70R    | 20  | 34  | 2215 | 0.01 | 0.01 | 0.00 | 1.3  | 0.21 |
| V106A | L210W   | 66  | 94  | 2893 | 0.02 | 0.02 | 0.00 | 1.3  | 0.21 |
| I94L  | M184IV  | 41  | 12  | 5124 | 0.01 | 0.01 | 0.00 | 1.3  | 0.21 |
| Y318F | D67N    | 21  | 13  | 3788 | 0.01 | 0.00 | 0.00 | 1.2  | 0.21 |
| G190Q | Q151M   | 4   | 31  | 373  | 0.01 | 0.00 | 0.00 | 1.2  | 0.22 |
| Y188C | K70R    | 2   | 12  | 2243 | 0.00 | 0.00 | 0.00 | -1.2 | 0.22 |
| Y318F | L210W   | 17  | 17  | 2960 | 0.01 | 0.00 | 0.00 | 1.2  | 0.22 |
| Q242L | Q151M   | 0   | 34  | 377  | 0.00 | 0.00 | 0.00 | NA   | 0.22 |
| Y318F | Q151M   | 0   | 34  | 377  | 0.00 | 0.00 | 0.00 | NA   | 0.22 |
| K101P | V75MT   | 18  | 164 | 586  | 0.02 | 0.02 | 0.01 | 1.2  | 0.22 |
| D237E | T215Y   | 54  | 53  | 3229 | 0.02 | 0.01 | 0.00 | 1.2  | 0.22 |
| D237E | T215F   | 14  | 91  | 1359 | 0.01 | 0.01 | 0.00 | -1.2 | 0.23 |
| D237E | Q151M   | 3   | 113 | 372  | 0.01 | 0.01 | 0.00 | -1.2 | 0.23 |
| K238N | D67N    | 23  | 15  | 3775 | 0.01 | 0.00 | 0.00 | 1.2  | 0.23 |
| K101E | M41L    | 400 | 320 | 3978 | 0.09 | 0.08 | 0.00 | 1.2  | 0.23 |
| Y181I | L74IV   | 34  | 77  | 1963 | 0.02 | 0.01 | 0.00 | 1.2  | 0.24 |
| K103H | M41L    | 12  | 3   | 4439 | 0.00 | 0.00 | 0.00 | 1.2  | 0.24 |
| Y181I | K65R    | 9   | 110 | 391  | 0.02 | 0.01 | 0.01 | 1.2  | 0.24 |
| Y181V | D67N    | 35  | 27  | 3779 | 0.01 | 0.01 | 0.00 | 1.2  | 0.24 |
| L100I | T69S_SS | 0   | 576 | 20   | 0.00 | 0.00 | 0.00 | NA   | 0.25 |
| K103H | V75MT   | 3   | 11  | 607  | 0.00 | 0.00 | 0.00 | 1.2  | 0.25 |
| Y318F | V75MT   | 5   | 29  | 605  | 0.01 | 0.00 | 0.00 | 1.1  | 0.25 |
| D237E | M41L    | 69  | 45  | 4356 | 0.02 | 0.01 | 0.00 | 1.1  | 0.25 |
| G190Q | D67N    | 21  | 14  | 3791 | 0.01 | 0.00 | 0.00 | 1.1  | 0.26 |
| K101E | K70R    | 205 | 508 | 1999 | 0.08 | 0.07 | 0.01 | 1.1  | 0.26 |
| Y232H | V75MT   | 0   | 18  | 609  | 0.00 | 0.00 | 0.00 | NA   | 0.27 |
| Y181I | M184IV  | 63  | 52  | 5123 | 0.01 | 0.01 | 0.00 | -1.1 | 0.27 |
| V106I | D67N    | 175 | 195 | 3806 | 0.04 | 0.04 | 0.00 | 1.1  | 0.27 |
| S105T | M41L    | 13  | 4   | 4438 | 0.00 | 0.00 | 0.00 | 1.1  | 0.27 |
| Y188H | K65R    | 3   | 20  | 397  | 0.01 | 0.00 | 0.00 | 1.1  | 0.27 |
| D237E | Y115F   | 6   | 109 | 244  | 0.02 | 0.01 | 0.01 | 1.1  | 0.27 |
| G190C | Y115F   | 2   | 14  | 250  | 0.01 | 0.00 | 0.01 | 1.1  | 0.28 |
| G190C | L74IV   | 6   | 8   | 1993 | 0.00 | 0.00 | 0.00 | 1.1  | 0.28 |
| K101H | L74IV   | 47  | 117 | 1942 | 0.02 | 0.02 | 0.00 | 1.1  | 0.28 |
| E138A | V75M.T  | 237 | 99  | 6033 | 0.04 | 0.03 | 0.00 | 1.1  | 0.29 |
| L234I | L210W   | 12  | 12  | 2968 | 0.00 | 0.00 | 0.00 | 1.1  | 0.29 |
| P236L | T215Y   | 9   | 5   | 3288 | 0.00 | 0.00 | 0.00 | 1.1  | 0.29 |
| V179D | V75M.T  | 174 | 110 | 6086 | 0.03 | 0.03 | 0.00 | -1.0 | 0.30 |
| Y232H | Y115F   | 2   | 16  | 250  | 0.01 | 0.00 | 0.01 | 1.0  | 0.30 |

|       |         |     |      |      |      |      |      |      |      |
|-------|---------|-----|------|------|------|------|------|------|------|
| V106M | Q151M   | 9   | 128  | 367  | 0.02 | 0.01 | 0.01 | 1.0  | 0.30 |
| G190A | K70E    | 8   | 1734 | 16   | 0.00 | 0.00 | 0.00 | 1.0  | 0.30 |
| Y181V | M41L    | 39  | 23   | 4415 | 0.01 | 0.01 | 0.00 | 1.0  | 0.30 |
| Y232H | T215Y   | 5   | 12   | 3294 | 0.00 | 0.00 | 0.00 | -1.0 | 0.30 |
| Y318F | M41L    | 22  | 11   | 4428 | 0.00 | 0.00 | 0.00 | 1.0  | 0.31 |
| Y188H | T215Y   | 7   | 16   | 3288 | 0.00 | 0.00 | 0.00 | -1.0 | 0.31 |
| D237E | M184IV  | 80  | 34   | 5066 | 0.02 | 0.01 | 0.00 | 1.0  | 0.31 |
| K238T | T69S_SS | 2   | 248  | 18   | 0.01 | 0.00 | 0.01 | 1.0  | 0.32 |
| K101E | M184IV  | 422 | 282  | 4677 | 0.08 | 0.08 | 0.00 | -1.0 | 0.32 |
| Y188H | M184IV  | 11  | 12   | 5164 | 0.00 | 0.00 | 0.00 | -1.0 | 0.32 |
| I178F | K65R    | 0   | 24   | 401  | 0.00 | 0.00 | 0.00 | NA   | 0.32 |
| V108I | T69S_SS | 4   | 872  | 15   | 0.00 | 0.00 | 0.00 | 1.0  | 0.32 |
| S105T | L74IV   | 7   | 11   | 1990 | 0.00 | 0.00 | 0.00 | 1.0  | 0.32 |
| S105T | M184IV  | 15  | 3    | 5165 | 0.00 | 0.00 | 0.00 | 1.0  | 0.32 |
| K102N | Y115F   | 0   | 38   | 251  | 0.00 | 0.00 | 0.00 | NA   | 0.32 |
| K101H | T215F   | 31  | 115  | 1339 | 0.02 | 0.02 | 0.00 | 1.0  | 0.33 |
| E138A | K70R    | 77  | 251  | 2317 | 0.03 | 0.03 | 0.00 | -1.0 | 0.33 |
| V106M | D67N    | 52  | 77   | 3753 | 0.01 | 0.02 | 0.00 | -1.0 | 0.34 |
| G190C | T69S_SS | 1   | 15   | 19   | 0.03 | 0.00 | 0.03 | 1.0  | 0.34 |
| Y181V | Q151M   | 5   | 60   | 372  | 0.01 | 0.01 | 0.01 | 1.0  | 0.34 |
| I178F | Q151M   | 0   | 24   | 377  | 0.00 | 0.00 | 0.00 | NA   | 0.34 |
| V241M | K70E    | 1   | 12   | 24   | 0.03 | 0.00 | 0.03 | 0.9  | 0.34 |
| K103H | Q151M   | 2   | 13   | 375  | 0.01 | 0.00 | 0.00 | 0.9  | 0.35 |
| L234I | T215Y   | 12  | 9    | 3286 | 0.00 | 0.00 | 0.00 | 0.9  | 0.35 |
| K238N | K70R    | 14  | 26   | 2216 | 0.01 | 0.00 | 0.00 | 0.9  | 0.35 |
| G190Q | T215F   | 8   | 22   | 1373 | 0.01 | 0.00 | 0.00 | 0.9  | 0.35 |
| V90I  | Q151M   | 31  | 596  | 354  | 0.03 | 0.03 | 0.01 | 0.9  | 0.35 |
| Y188C | V75MT   | 0   | 14   | 609  | 0.00 | 0.00 | 0.00 | NA   | 0.36 |
| K102N | D67N    | 21  | 16   | 3787 | 0.01 | 0.00 | 0.00 | 0.9  | 0.36 |
| V179F | T215Y   | 11  | 8    | 3277 | 0.00 | 0.00 | 0.00 | 0.9  | 0.36 |
| Q242L | T69S_SS | 1   | 33   | 19   | 0.02 | 0.00 | 0.02 | 0.9  | 0.36 |
| G190E | D67N    | 15  | 26   | 3796 | 0.00 | 0.00 | 0.00 | -0.9 | 0.36 |
| Q242L | Y115F   | 0   | 34   | 252  | 0.00 | 0.00 | 0.00 | NA   | 0.36 |
| L234I | K70E    | 1   | 23   | 24   | 0.02 | 0.00 | 0.02 | 0.9  | 0.36 |
| K101P | T215F   | 34  | 130  | 1339 | 0.02 | 0.02 | 0.00 | 0.9  | 0.37 |
| Y188L | T69S_SS | 3   | 626  | 17   | 0.00 | 0.00 | 0.00 | 0.9  | 0.37 |
| K103N | T69S_SS | 8   | 4395 | 12   | 0.00 | 0.00 | 0.00 | -0.9 | 0.37 |
| Y318F | L74IV   | 11  | 22   | 1985 | 0.01 | 0.00 | 0.00 | 0.9  | 0.37 |
| G190Q | M184IV  | 18  | 17   | 5169 | 0.00 | 0.00 | 0.00 | -0.9 | 0.38 |
| V106A | V75MT   | 15  | 149  | 591  | 0.02 | 0.02 | 0.01 | 0.9  | 0.38 |
| E138A | K65R    | 12  | 321  | 416  | 0.02 | 0.02 | 0.00 | -0.9 | 0.38 |
| L234I | M184IV  | 18  | 5    | 5165 | 0.00 | 0.00 | 0.00 | 0.9  | 0.38 |



|       |         |     |     |      |      |      |      |      |      |
|-------|---------|-----|-----|------|------|------|------|------|------|
| V179F | M41L    | 15  | 7   | 4425 | 0.00 | 0.00 | 0.00 | 0.9  | 0.38 |
| K101N | Y115F   | 0   | 32  | 251  | 0.00 | 0.00 | 0.00 | NA   | 0.39 |
| Y318F | T215Y   | 18  | 16  | 3274 | 0.01 | 0.00 | 0.00 | 0.9  | 0.39 |
| H221Y | T215Y   | 248 | 309 | 2947 | 0.07 | 0.07 | 0.00 | 0.9  | 0.39 |
| K223T | V75MT   | 6   | 50  | 601  | 0.01 | 0.01 | 0.00 | 0.9  | 0.39 |
| K101N | L210W   | 14  | 17  | 2959 | 0.00 | 0.00 | 0.00 | 0.9  | 0.39 |
| V106M | M184IV  | 76  | 57  | 5107 | 0.01 | 0.02 | 0.00 | -0.9 | 0.39 |
| I178F | L74IV   | 8   | 15  | 1990 | 0.00 | 0.00 | 0.00 | 0.8  | 0.40 |
| G190C | L210W   | 8   | 8   | 2970 | 0.00 | 0.00 | 0.00 | 0.8  | 0.40 |
| E138Q | T69S_SS | 1   | 63  | 19   | 0.01 | 0.00 | 0.01 | 0.8  | 0.40 |
| V179T | K70R    | 12  | 23  | 2379 | 0.00 | 0.00 | 0.00 | 0.8  | 0.40 |
| S105T | K65R    | 0   | 19  | 401  | 0.00 | 0.00 | 0.00 | NA   | 0.40 |
| V108I | K70R    | 217 | 639 | 1916 | 0.08 | 0.08 | 0.01 | -0.8 | 0.40 |
| Y232H | L74IV   | 3   | 15  | 1996 | 0.00 | 0.00 | 0.00 | -0.8 | 0.41 |
| L234I | D67N    | 14  | 10  | 3798 | 0.00 | 0.00 | 0.00 | 0.8  | 0.41 |
| Y181V | T215F   | 12  | 40  | 1369 | 0.01 | 0.01 | 0.00 | 0.8  | 0.41 |
| K103S | Q151M   | 6   | 174 | 369  | 0.01 | 0.01 | 0.00 | -0.8 | 0.41 |
| E138Q | K70E    | 1   | 63  | 24   | 0.01 | 0.00 | 0.01 | 0.8  | 0.42 |
| Q242L | M184IV  | 24  | 8   | 5152 | 0.00 | 0.00 | 0.00 | 0.8  | 0.42 |
| V106M | T215F   | 19  | 108 | 1358 | 0.01 | 0.02 | 0.00 | -0.8 | 0.42 |
| V179T | Q151M   | 0   | 35  | 394  | 0.00 | 0.00 | 0.00 | NA   | 0.42 |
| Y232H | K65R    | 0   | 18  | 400  | 0.00 | 0.00 | 0.00 | NA   | 0.42 |
| K103T | T215F   | 1   | 9   | 1379 | 0.00 | 0.00 | 0.00 | -0.8 | 0.43 |
| V106A | M41L    | 90  | 68  | 4339 | 0.02 | 0.02 | 0.00 | 0.8  | 0.43 |
| P225H | Y115F   | 10  | 247 | 239  | 0.02 | 0.02 | 0.01 | 0.8  | 0.43 |
| K103S | L210W   | 69  | 110 | 2881 | 0.02 | 0.02 | 0.00 | 0.8  | 0.43 |
| Y318F | M184IV  | 25  | 9   | 5159 | 0.00 | 0.00 | 0.00 | 0.8  | 0.43 |
| G190Q | M41L    | 22  | 13  | 4431 | 0.00 | 0.00 | 0.00 | 0.8  | 0.43 |
| E138Q | M184IV  | 43  | 18  | 5112 | 0.01 | 0.01 | 0.00 | 0.8  | 0.44 |
| G190S | K70E    | 2   | 309 | 23   | 0.01 | 0.00 | 0.00 | 0.8  | 0.44 |
| K103S | T215Y   | 61  | 98  | 3214 | 0.02 | 0.02 | 0.00 | -0.8 | 0.44 |
| F227Y | K65R    | 0   | 17  | 401  | 0.00 | 0.00 | 0.00 | NA   | 0.44 |
| K102N | M184IV  | 27  | 10  | 5150 | 0.01 | 0.00 | 0.00 | 0.8  | 0.44 |
| E138Q | K65R    | 2   | 62  | 398  | 0.00 | 0.01 | 0.00 | -0.8 | 0.45 |
| K238T | M41L    | 120 | 123 | 4273 | 0.03 | 0.03 | 0.00 | -0.8 | 0.45 |
| M230L | L210W   | 32  | 71  | 2950 | 0.01 | 0.01 | 0.00 | -0.8 | 0.45 |
| I178F | V75MT   | 3   | 21  | 607  | 0.00 | 0.00 | 0.00 | 0.7  | 0.45 |
| G190S | K70R    | 88  | 216 | 2149 | 0.04 | 0.03 | 0.00 | 0.7  | 0.46 |
| V241M | D67N    | 4   | 8   | 3808 | 0.00 | 0.00 | 0.00 | -0.7 | 0.46 |
| V241M | V75MT   | 2   | 11  | 607  | 0.00 | 0.00 | 0.00 | 0.7  | 0.46 |
| V179D | K70R    | 66  | 212 | 2320 | 0.03 | 0.03 | 0.00 | -0.7 | 0.46 |
| K102N | K65R    | 1   | 36  | 399  | 0.00 | 0.00 | 0.00 | -0.7 | 0.46 |

|       |         |     |     |      |      |      |      |      |      |
|-------|---------|-----|-----|------|------|------|------|------|------|
| M230L | T215F   | 20  | 75  | 1361 | 0.01 | 0.01 | 0.00 | 0.7  | 0.47 |
| P236L | K65R    | 0   | 16  | 401  | 0.00 | 0.00 | 0.00 | NA   | 0.47 |
| G190C | T215Y   | 4   | 9   | 3291 | 0.00 | 0.00 | 0.00 | -0.7 | 0.47 |
| P225H | K70E    | 0   | 255 | 25   | 0.00 | 0.00 | 0.00 | NA   | 0.47 |
| L100I | K70E    | 1   | 574 | 24   | 0.00 | 0.00 | 0.00 | -0.7 | 0.47 |
| V179F | K65R    | 2   | 19  | 399  | 0.00 | 0.00 | 0.00 | 0.7  | 0.47 |
| K102N | K70R    | 12  | 24  | 2231 | 0.01 | 0.00 | 0.00 | 0.7  | 0.47 |
| K101H | K70R    | 39  | 124 | 2198 | 0.02 | 0.02 | 0.00 | -0.7 | 0.47 |
| Y188L | Q151M   | 24  | 603 | 353  | 0.02 | 0.03 | 0.00 | -0.7 | 0.47 |
| L100I | K70R    | 140 | 414 | 2080 | 0.05 | 0.06 | 0.00 | -0.7 | 0.48 |
| Y181V | K65R    | 2   | 62  | 399  | 0.00 | 0.01 | 0.00 | -0.7 | 0.48 |
| G190C | K70R    | 6   | 10  | 2240 | 0.00 | 0.00 | 0.00 | 0.7  | 0.48 |
| V106I | V75M.T  | 237 | 139 | 5961 | 0.04 | 0.04 | 0.00 | -0.7 | 0.48 |
| K101E | T69S_SS | 1   | 732 | 19   | 0.00 | 0.00 | 0.00 | -0.7 | 0.48 |
| H221C | M184IV  | 11  | 3   | 5171 | 0.00 | 0.00 | 0.00 | 0.7  | 0.48 |
| M230L | K70E    | 1   | 104 | 24   | 0.01 | 0.00 | 0.01 | 0.7  | 0.48 |
| K103T | T215Y   | 3   | 7   | 3296 | 0.00 | 0.00 | 0.00 | -0.7 | 0.49 |
| I178F | Y115F   | 0   | 24  | 252  | 0.00 | 0.00 | 0.00 | NA   | 0.49 |
| P236L | Q151M   | 0   | 16  | 377  | 0.00 | 0.00 | 0.00 | NA   | 0.49 |
| V106I | K70E    | 2   | 372 | 25   | 0.01 | 0.00 | 0.00 | 0.7  | 0.49 |
| Y181V | L210W   | 26  | 38  | 2956 | 0.01 | 0.01 | 0.00 | 0.7  | 0.49 |
| G190E | Q151M   | 3   | 39  | 374  | 0.01 | 0.00 | 0.00 | 0.7  | 0.49 |
| G190C | V75MT   | 2   | 13  | 606  | 0.00 | 0.00 | 0.00 | 0.7  | 0.49 |
| K103T | K70R    | 4   | 6   | 2242 | 0.00 | 0.00 | 0.00 | 0.7  | 0.49 |
| I178F | M184IV  | 12  | 11  | 5171 | 0.00 | 0.00 | 0.00 | -0.7 | 0.50 |
| K238T | M184IV  | 156 | 82  | 4935 | 0.03 | 0.03 | 0.00 | 0.7  | 0.50 |
| G190Q | Y115F   | 2   | 33  | 250  | 0.01 | 0.00 | 0.00 | 0.7  | 0.50 |
| Y188H | Y115F   | 0   | 23  | 252  | 0.00 | 0.00 | 0.00 | NA   | 0.50 |
| Y232H | M184IV  | 13  | 4   | 5167 | 0.00 | 0.00 | 0.00 | 0.7  | 0.51 |
| Y181I | K70E    | 1   | 119 | 24   | 0.01 | 0.00 | 0.01 | 0.7  | 0.51 |
| Y188L | K70R    | 155 | 455 | 2082 | 0.06 | 0.06 | 0.00 | -0.7 | 0.51 |
| K101N | L74IV   | 6   | 25  | 1987 | 0.00 | 0.00 | 0.00 | -0.7 | 0.51 |
| H221C | K65R    | 0   | 14  | 401  | 0.00 | 0.00 | 0.00 | NA   | 0.51 |
| K101P | M184IV  | 104 | 73  | 5060 | 0.02 | 0.02 | 0.00 | -0.7 | 0.51 |
| V179T | D67N    | 18  | 17  | 4017 | 0.00 | 0.00 | 0.00 | 0.7  | 0.52 |
| K101H | T69S_SS | 1   | 166 | 19   | 0.01 | 0.00 | 0.01 | 0.7  | 0.52 |
| D237E | K70E    | 1   | 114 | 24   | 0.01 | 0.00 | 0.01 | 0.6  | 0.52 |
| K102N | Q151M   | 1   | 37  | 374  | 0.00 | 0.00 | 0.00 | -0.6 | 0.52 |
| H221Y | M41L    | 333 | 278 | 3965 | 0.07 | 0.07 | 0.00 | 0.6  | 0.52 |
| Y181V | T215Y   | 25  | 27  | 3273 | 0.01 | 0.01 | 0.00 | 0.6  | 0.52 |
| G190S | M41L    | 169 | 139 | 4245 | 0.04 | 0.04 | 0.00 | 0.6  | 0.52 |
| K238T | T215Y   | 86  | 130 | 3185 | 0.03 | 0.03 | 0.00 | -0.6 | 0.53 |

|       |         |     |      |      |      |      |      |      |      |
|-------|---------|-----|------|------|------|------|------|------|------|
| F227L | K70E    | 0   | 214  | 25   | 0.00 | 0.00 | 0.00 | NA   | 0.53 |
| K101N | K70R    | 10  | 20   | 2230 | 0.00 | 0.00 | 0.00 | 0.6  | 0.53 |
| H221C | Q151M   | 0   | 14   | 377  | 0.00 | 0.00 | 0.00 | NA   | 0.54 |
| V241M | K65R    | 0   | 13   | 401  | 0.00 | 0.00 | 0.00 | NA   | 0.54 |
| E138A | Y115F   | 8   | 328  | 266  | 0.01 | 0.02 | 0.00 | -0.6 | 0.54 |
| Y181I | V75MT   | 7   | 113  | 603  | 0.01 | 0.01 | 0.00 | -0.6 | 0.54 |
| P225H | T69S_SS | 0   | 258  | 20   | 0.00 | 0.00 | 0.00 | NA   | 0.54 |
| K238N | M41L    | 24  | 16   | 4405 | 0.01 | 0.00 | 0.00 | 0.6  | 0.54 |
| K103H | D67N    | 8   | 6    | 3804 | 0.00 | 0.00 | 0.00 | 0.6  | 0.55 |
| G190Q | K70R    | 11  | 23   | 2236 | 0.00 | 0.00 | 0.00 | 0.6  | 0.55 |
| K103H | K70R    | 3   | 12   | 2245 | 0.00 | 0.00 | 0.00 | -0.6 | 0.55 |
| V241M | M41L    | 5   | 7    | 4446 | 0.00 | 0.00 | 0.00 | -0.6 | 0.55 |
| M230L | T215Y   | 44  | 51   | 3252 | 0.01 | 0.01 | 0.00 | 0.6  | 0.55 |
| I94L  | Y115F   | 1   | 54   | 251  | 0.00 | 0.01 | 0.00 | -0.6 | 0.55 |
| Y188C | Y115F   | 1   | 13   | 251  | 0.00 | 0.00 | 0.00 | 0.6  | 0.55 |
| V106M | K70E    | 1   | 135  | 24   | 0.01 | 0.00 | 0.01 | 0.6  | 0.55 |
| H221C | Y115F   | 1   | 13   | 250  | 0.00 | 0.00 | 0.00 | 0.6  | 0.55 |
| V106A | M184IV  | 93  | 65   | 5080 | 0.02 | 0.02 | 0.00 | -0.6 | 0.56 |
| K238N | M184IV  | 28  | 12   | 5132 | 0.01 | 0.00 | 0.00 | 0.6  | 0.56 |
| Y318F | K65R    | 1   | 33   | 400  | 0.00 | 0.00 | 0.00 | -0.6 | 0.56 |
| V179F | D67N    | 11  | 9    | 3787 | 0.00 | 0.00 | 0.00 | 0.6  | 0.56 |
| V179T | K65R    | 1   | 34   | 426  | 0.00 | 0.00 | 0.00 | -0.6 | 0.56 |
| V241M | Q151M   | 0   | 13   | 377  | 0.00 | 0.00 | 0.00 | NA   | 0.56 |
| F227Y | V75MT   | 2   | 15   | 606  | 0.00 | 0.00 | 0.00 | 0.6  | 0.56 |
| S105T | D67N    | 10  | 8    | 3800 | 0.00 | 0.00 | 0.00 | 0.6  | 0.57 |
| Q242L | T215F   | 6   | 20   | 1372 | 0.00 | 0.00 | 0.00 | 0.6  | 0.57 |
| T139R | K70R    | 24  | 56   | 2218 | 0.01 | 0.01 | 0.00 | 0.6  | 0.57 |
| K103S | T69S_SS | 1   | 180  | 19   | 0.01 | 0.00 | 0.01 | 0.6  | 0.57 |
| K101E | Y115F   | 19  | 712  | 229  | 0.02 | 0.02 | 0.00 | -0.6 | 0.57 |
| K103H | Y115F   | 1   | 14   | 251  | 0.00 | 0.00 | 0.00 | 0.6  | 0.57 |
| F227Y | K70R    | 3   | 12   | 2239 | 0.00 | 0.00 | 0.00 | -0.6 | 0.57 |
| V179F | V75MT   | 1   | 21   | 607  | 0.00 | 0.00 | 0.00 | -0.6 | 0.57 |
| K103T | M184IV  | 5   | 5    | 5184 | 0.00 | 0.00 | 0.00 | -0.6 | 0.58 |
| G190A | T69S_SS | 5   | 1741 | 13   | 0.00 | 0.00 | 0.00 | 0.6  | 0.58 |
| F227Y | T215F   | 2   | 14   | 1375 | 0.00 | 0.00 | 0.00 | -0.6 | 0.58 |
| V108I | T215F   | 130 | 642  | 1183 | 0.07 | 0.07 | 0.01 | -0.6 | 0.58 |
| E138Q | Q151M   | 2   | 62   | 374  | 0.00 | 0.01 | 0.00 | -0.6 | 0.58 |
| V90I  | T69S_SS | 1   | 628  | 22   | 0.00 | 0.00 | 0.00 | -0.6 | 0.58 |
| K103T | K65R    | 1   | 9    | 400  | 0.00 | 0.00 | 0.00 | 0.5  | 0.58 |
| V179D | V179T   | 0   | 284  | 35   | 0.00 | 0.00 | 0.00 | NA   | 0.59 |
| K103S | K70E    | 0   | 179  | 25   | 0.00 | 0.00 | 0.00 | NA   | 0.59 |
| V179D | T215F   | 48  | 220  | 1386 | 0.03 | 0.03 | 0.00 | 0.5  | 0.59 |

|       |         |     |     |      |      |      |      |      |      |
|-------|---------|-----|-----|------|------|------|------|------|------|
| V106A | K70E    | 1   | 163 | 24   | 0.01 | 0.00 | 0.01 | 0.5  | 0.60 |
| E138Q | D67N    | 31  | 31  | 3754 | 0.01 | 0.01 | 0.00 | 0.5  | 0.60 |
| F227L | T69S_SS | 0   | 214 | 20   | 0.00 | 0.00 | 0.00 | NA   | 0.60 |
| F227Y | Y115F   | 0   | 17  | 251  | 0.00 | 0.00 | 0.00 | NA   | 0.60 |
| K101H | K70E    | 0   | 168 | 25   | 0.00 | 0.00 | 0.00 | NA   | 0.61 |
| S105T | V75MT   | 2   | 16  | 607  | 0.00 | 0.00 | 0.00 | 0.5  | 0.61 |
| G190E | V75MT   | 4   | 38  | 605  | 0.01 | 0.00 | 0.00 | 0.5  | 0.62 |
| V90I  | V75M.T  | 405 | 224 | 5724 | 0.06 | 0.07 | 0.00 | -0.5 | 0.62 |
| Y181V | K70R    | 19  | 44  | 2229 | 0.01 | 0.01 | 0.00 | 0.5  | 0.62 |
| P236L | Y115F   | 0   | 16  | 252  | 0.00 | 0.00 | 0.00 | NA   | 0.62 |
| H221Y | L210W   | 222 | 388 | 2655 | 0.07 | 0.07 | 0.00 | 0.5  | 0.62 |
| P236L | M184IV  | 8   | 7   | 5180 | 0.00 | 0.00 | 0.00 | -0.5 | 0.63 |
| K103S | M41L    | 99  | 81  | 4317 | 0.02 | 0.02 | 0.00 | 0.5  | 0.64 |
| Y232H | D67N    | 7   | 11  | 3806 | 0.00 | 0.00 | 0.00 | -0.5 | 0.64 |
| E138A | K70E    | 0   | 333 | 27   | 0.00 | 0.00 | 0.00 | NA   | 0.64 |
| G190E | L210W   | 13  | 29  | 2965 | 0.00 | 0.00 | 0.00 | -0.5 | 0.64 |
| V106M | Y115F   | 5   | 129 | 247  | 0.01 | 0.01 | 0.01 | 0.5  | 0.64 |
| K103T | Q151M   | 0   | 10  | 377  | 0.00 | 0.00 | 0.00 | NA   | 0.64 |
| K101P | K70E    | 1   | 184 | 24   | 0.00 | 0.00 | 0.00 | 0.5  | 0.64 |
| K101P | T69S_SS | 0   | 185 | 20   | 0.00 | 0.00 | 0.00 | NA   | 0.65 |
| K101N | Q151M   | 2   | 30  | 374  | 0.00 | 0.00 | 0.00 | 0.5  | 0.65 |
| V179T | L74I    | 3   | 29  | 639  | 0.00 | 0.00 | 0.00 | 0.5  | 0.65 |
| K101H | Y115F   | 6   | 162 | 245  | 0.01 | 0.01 | 0.01 | 0.4  | 0.65 |
| D237E | D67N    | 55  | 59  | 3736 | 0.01 | 0.01 | 0.00 | 0.4  | 0.66 |
| V106A | Y115F   | 4   | 159 | 248  | 0.01 | 0.01 | 0.00 | -0.4 | 0.66 |
| M230L | K65R    | 6   | 99  | 393  | 0.01 | 0.01 | 0.00 | 0.4  | 0.67 |
| K238T | T215F   | 35  | 176 | 1331 | 0.02 | 0.02 | 0.00 | -0.4 | 0.68 |
| V241M | Y115F   | 0   | 13  | 251  | 0.00 | 0.00 | 0.00 | NA   | 0.68 |
| V106A | T69S_SS | 0   | 164 | 20   | 0.00 | 0.00 | 0.00 | NA   | 0.68 |
| Y181V | M184IV  | 42  | 21  | 5146 | 0.01 | 0.01 | 0.00 | 0.4  | 0.68 |
| A98G  | K70E    | 2   | 879 | 23   | 0.00 | 0.00 | 0.00 | -0.4 | 0.68 |
| K101N | V75MT   | 3   | 29  | 604  | 0.00 | 0.00 | 0.00 | 0.4  | 0.68 |
| H221C | D67N    | 5   | 8   | 3807 | 0.00 | 0.00 | 0.00 | -0.4 | 0.68 |
| V179F | T215F   | 4   | 14  | 1373 | 0.00 | 0.00 | 0.00 | 0.4  | 0.68 |
| F227Y | M184IV  | 12  | 5   | 5170 | 0.00 | 0.00 | 0.00 | 0.4  | 0.69 |
| G190S | T215Y   | 115 | 168 | 3157 | 0.03 | 0.03 | 0.00 | -0.4 | 0.70 |
| V179T | T215Y   | 12  | 21  | 3471 | 0.00 | 0.00 | 0.00 | -0.4 | 0.70 |
| K101P | K70R    | 46  | 136 | 2190 | 0.02 | 0.02 | 0.00 | -0.4 | 0.70 |
| Y188C | Q151M   | 1   | 13  | 376  | 0.00 | 0.00 | 0.00 | 0.4  | 0.71 |
| K223T | Q151M   | 2   | 56  | 375  | 0.00 | 0.01 | 0.00 | -0.4 | 0.71 |
| V106I | K65R    | 15  | 355 | 402  | 0.02 | 0.02 | 0.00 | -0.4 | 0.71 |
| I178F | T215F   | 3   | 18  | 1377 | 0.00 | 0.00 | 0.00 | -0.4 | 0.71 |

|       |         |     |     |      |      |      |      |      |      |
|-------|---------|-----|-----|------|------|------|------|------|------|
| H221Y | T69S_SS | 2   | 617 | 18   | 0.00 | 0.00 | 0.00 | 0.4  | 0.71 |
| K101N | D67N    | 15  | 15  | 3780 | 0.00 | 0.00 | 0.00 | 0.4  | 0.71 |
| K101N | K65R    | 1   | 29  | 398  | 0.00 | 0.00 | 0.00 | -0.4 | 0.72 |
| L234I | M41L    | 14  | 10  | 4439 | 0.00 | 0.00 | 0.00 | 0.4  | 0.72 |
| F227L | M184IV  | 131 | 73  | 5001 | 0.03 | 0.02 | 0.00 | 0.4  | 0.72 |
| V106M | T69S_SS | 0   | 136 | 20   | 0.00 | 0.00 | 0.00 | NA   | 0.73 |
| K103T | Y115F   | 0   | 10  | 252  | 0.00 | 0.00 | 0.00 | NA   | 0.74 |
| Y181I | M41L    | 65  | 54  | 4386 | 0.01 | 0.01 | 0.00 | 0.3  | 0.75 |
| E138Q | V75MT   | 4   | 60  | 606  | 0.01 | 0.01 | 0.00 | -0.3 | 0.75 |
| I94L  | Q151M   | 3   | 52  | 374  | 0.01 | 0.01 | 0.00 | 0.3  | 0.75 |
| K103H | K65R    | 1   | 14  | 399  | 0.00 | 0.00 | 0.00 | 0.3  | 0.75 |
| V179T | L210W   | 13  | 22  | 3137 | 0.00 | 0.00 | 0.00 | 0.3  | 0.76 |
| K238N | T215F   | 7   | 28  | 1370 | 0.00 | 0.00 | 0.00 | 0.3  | 0.76 |
| V179D | T69S_SS | 1   | 283 | 22   | 0.00 | 0.00 | 0.00 | 0.3  | 0.76 |
| P236L | T215F   | 2   | 12  | 1379 | 0.00 | 0.00 | 0.00 | -0.3 | 0.76 |
| Y181I | T69S_SS | 0   | 118 | 20   | 0.00 | 0.00 | 0.00 | NA   | 0.76 |
| G190Q | T215Y   | 12  | 19  | 3286 | 0.00 | 0.00 | 0.00 | -0.3 | 0.76 |
| D237E | T69S_SS | 0   | 116 | 20   | 0.00 | 0.00 | 0.00 | NA   | 0.76 |
| V179D | M184V.I | 259 | 25  | 8573 | 0.03 | 0.03 | 0.00 | -0.3 | 0.76 |
| L234I | Y115F   | 1   | 23  | 251  | 0.00 | 0.00 | 0.00 | 0.3  | 0.76 |
| K103T | L210W   | 3   | 7   | 2979 | 0.00 | 0.00 | 0.00 | -0.3 | 0.77 |
| P225H | K65R    | 11  | 242 | 387  | 0.02 | 0.02 | 0.01 | -0.3 | 0.77 |
| V90I  | K65R    | 26  | 599 | 379  | 0.03 | 0.03 | 0.01 | -0.3 | 0.77 |
| L100I | Y115F   | 18  | 556 | 232  | 0.02 | 0.02 | 0.01 | 0.3  | 0.77 |
| K103T | V75MT   | 1   | 9   | 607  | 0.00 | 0.00 | 0.00 | 0.3  | 0.77 |
| Y318F | K70R    | 10  | 24  | 2234 | 0.00 | 0.00 | 0.00 | 0.3  | 0.77 |
| G190C | Q151M   | 1   | 15  | 376  | 0.00 | 0.00 | 0.00 | 0.3  | 0.78 |
| K102N | L210W   | 12  | 25  | 2966 | 0.00 | 0.00 | 0.00 | -0.3 | 0.78 |
| V241M | L210W   | 4   | 9   | 2975 | 0.00 | 0.00 | 0.00 | -0.3 | 0.78 |
| M230L | T69S_SS | 0   | 105 | 20   | 0.00 | 0.00 | 0.00 | NA   | 0.78 |
| T139R | K70E    | 0   | 83  | 25   | 0.00 | 0.00 | 0.00 | NA   | 0.78 |
| P236L | D67N    | 8   | 8   | 3805 | 0.00 | 0.00 | 0.00 | 0.3  | 0.79 |
| K103H | T215Y   | 6   | 7   | 3290 | 0.00 | 0.00 | 0.00 | 0.3  | 0.79 |
| F227Y | Q151M   | 1   | 16  | 376  | 0.00 | 0.00 | 0.00 | 0.3  | 0.80 |
| K238T | K70E    | 1   | 246 | 24   | 0.00 | 0.00 | 0.00 | 0.3  | 0.80 |
| V106M | K70R    | 34  | 99  | 2206 | 0.01 | 0.02 | 0.00 | -0.2 | 0.80 |
| G190C | D67N    | 8   | 8   | 3802 | 0.00 | 0.00 | 0.00 | 0.2  | 0.81 |
| G190Q | K65R    | 2   | 33  | 399  | 0.00 | 0.00 | 0.00 | 0.2  | 0.81 |
| V241M | T215Y   | 6   | 7   | 3290 | 0.00 | 0.00 | 0.00 | 0.2  | 0.81 |
| G190C | K65R    | 1   | 15  | 400  | 0.00 | 0.00 | 0.00 | 0.2  | 0.81 |
| Y232H | Q151M   | 1   | 17  | 376  | 0.00 | 0.00 | 0.00 | 0.2  | 0.82 |
| K238N | L210W   | 15  | 25  | 2947 | 0.01 | 0.00 | 0.00 | 0.2  | 0.82 |

|       |         |      |      |      |      |      |      |      |      |
|-------|---------|------|------|------|------|------|------|------|------|
| G190A | K65R    | 81   | 1655 | 299  | 0.04 | 0.04 | 0.00 | 0.2  | 0.82 |
| T139R | T69S_SS | 0    | 83   | 20   | 0.00 | 0.00 | 0.00 | NA   | 0.82 |
| D237E | L74IV   | 25   | 81   | 1954 | 0.01 | 0.01 | 0.00 | -0.2 | 0.83 |
| V241M | T215F   | 2    | 11   | 1377 | 0.00 | 0.00 | 0.00 | -0.2 | 0.83 |
| H221Y | D67N    | 275  | 331  | 3433 | 0.07 | 0.07 | 0.00 | -0.2 | 0.83 |
| Y232H | K70R    | 5    | 12   | 2241 | 0.00 | 0.00 | 0.00 | 0.2  | 0.83 |
| K238T | L210W   | 88   | 156  | 2861 | 0.03 | 0.03 | 0.00 | 0.2  | 0.83 |
| Y181V | K70E    | 0    | 63   | 25   | 0.00 | 0.00 | 0.00 | NA   | 0.83 |
| K103T | D67N    | 5    | 5    | 3807 | 0.00 | 0.00 | 0.00 | 0.2  | 0.84 |
| V179D | K70E    | 1    | 280  | 26   | 0.00 | 0.00 | 0.00 | 0.2  | 0.84 |
| K103H | T215F   | 2    | 11   | 1378 | 0.00 | 0.00 | 0.00 | -0.2 | 0.84 |
| V106A | K65R    | 7    | 156  | 391  | 0.01 | 0.01 | 0.00 | -0.2 | 0.84 |
| L234I | K70R    | 6    | 18   | 2240 | 0.00 | 0.00 | 0.00 | -0.2 | 0.84 |
| E138A | T69S_SS | 1    | 335  | 22   | 0.00 | 0.00 | 0.00 | 0.2  | 0.84 |
| K223T | K70E    | 0    | 58   | 25   | 0.00 | 0.00 | 0.00 | NA   | 0.84 |
| I94L  | K70E    | 0    | 55   | 25   | 0.00 | 0.00 | 0.00 | NA   | 0.85 |
| G190C | M41L    | 9    | 7    | 4441 | 0.00 | 0.00 | 0.00 | 0.2  | 0.85 |
| K103S | K65R    | 8    | 173  | 391  | 0.01 | 0.01 | 0.00 | -0.2 | 0.85 |
| Y181C | T69S_SS | 6    | 2401 | 13   | 0.00 | 0.00 | 0.00 | 0.2  | 0.85 |
| P236L | M41L    | 9    | 7    | 4445 | 0.00 | 0.00 | 0.00 | 0.2  | 0.85 |
| P225H | Q151M   | 12   | 246  | 362  | 0.02 | 0.02 | 0.01 | 0.2  | 0.86 |
| G190S | L210W   | 108  | 196  | 2840 | 0.03 | 0.03 | 0.00 | 0.2  | 0.86 |
| Y181V | T69S_SS | 0    | 65   | 20   | 0.00 | 0.00 | 0.00 | NA   | 0.86 |
| K238N | Y115F   | 1    | 40   | 250  | 0.00 | 0.00 | 0.00 | -0.2 | 0.87 |
| K223T | T69S_SS | 0    | 58   | 20   | 0.00 | 0.00 | 0.00 | NA   | 0.87 |
| V179T | M41L    | 17   | 18   | 4703 | 0.00 | 0.00 | 0.00 | -0.2 | 0.87 |
| S105T | Q151M   | 1    | 18   | 376  | 0.00 | 0.00 | 0.00 | 0.2  | 0.88 |
| I94L  | T69S_SS | 0    | 55   | 20   | 0.00 | 0.00 | 0.00 | NA   | 0.88 |
| K103N | L74IV   | 1002 | 3104 | 928  | 0.20 | 0.20 | 0.01 | -0.1 | 0.88 |
| Y181V | V75MT   | 5    | 60   | 605  | 0.01 | 0.01 | 0.00 | 0.1  | 0.88 |
| K223T | T215F   | 9    | 44   | 1367 | 0.01 | 0.01 | 0.00 | -0.1 | 0.88 |
| T139R | T215F   | 14   | 62   | 1364 | 0.01 | 0.01 | 0.00 | 0.1  | 0.88 |
| G190E | K70E    | 0    | 42   | 25   | 0.00 | 0.00 | 0.00 | NA   | 0.89 |
| K238N | K70E    | 0    | 41   | 25   | 0.00 | 0.00 | 0.00 | NA   | 0.89 |
| E138A | M184V.I | 314  | 22   | 8530 | 0.04 | 0.04 | 0.00 | 0.1  | 0.89 |
| K101N | T215Y   | 13   | 17   | 3271 | 0.00 | 0.00 | 0.00 | 0.1  | 0.90 |
| V90I  | K70E    | 2    | 625  | 24   | 0.00 | 0.00 | 0.00 | 0.1  | 0.90 |
| G190S | Q151M   | 14   | 294  | 359  | 0.02 | 0.02 | 0.01 | 0.1  | 0.90 |
| K102N | K70E    | 0    | 38   | 25   | 0.00 | 0.00 | 0.00 | NA   | 0.90 |
| V241M | L74IV   | 3    | 10   | 1997 | 0.00 | 0.00 | 0.00 | -0.1 | 0.90 |
| K103H | M184IV  | 9    | 6    | 5177 | 0.00 | 0.00 | 0.00 | -0.1 | 0.90 |
| K103T | M41L    | 5    | 5    | 4450 | 0.00 | 0.00 | 0.00 | -0.1 | 0.90 |

|       |         |     |     |      |      |      |      |      |      |
|-------|---------|-----|-----|------|------|------|------|------|------|
| G190Q | K70E    | 0   | 34  | 25   | 0.00 | 0.00 | 0.00 | NA   | 0.91 |
| Q242L | K70E    | 0   | 34  | 25   | 0.00 | 0.00 | 0.00 | NA   | 0.91 |
| Y318F | K70E    | 0   | 34  | 25   | 0.00 | 0.00 | 0.00 | NA   | 0.91 |
| P236L | V75MT   | 1   | 15  | 609  | 0.00 | 0.00 | 0.00 | -0.1 | 0.91 |
| G190E | T69S_SS | 0   | 42  | 20   | 0.00 | 0.00 | 0.00 | NA   | 0.91 |
| G190S | K65R    | 14  | 296 | 386  | 0.02 | 0.02 | 0.01 | -0.1 | 0.91 |
| K238N | T69S_SS | 0   | 41  | 20   | 0.00 | 0.00 | 0.00 | NA   | 0.91 |
| K103T | L74IV   | 2   | 7   | 1998 | 0.00 | 0.00 | 0.00 | -0.1 | 0.91 |
| K101N | K70E    | 0   | 32  | 25   | 0.00 | 0.00 | 0.00 | NA   | 0.91 |
| V106I | Y115F   | 11  | 363 | 255  | 0.02 | 0.02 | 0.01 | 0.1  | 0.91 |
| V179F | K70R    | 6   | 16  | 2233 | 0.00 | 0.00 | 0.00 | 0.1  | 0.91 |
| K102N | T69S_SS | 0   | 38  | 20   | 0.00 | 0.00 | 0.00 | NA   | 0.92 |
| K101N | M184IV  | 19  | 12  | 5149 | 0.00 | 0.00 | 0.00 | -0.1 | 0.92 |
| K103S | L74IV   | 43  | 130 | 1938 | 0.02 | 0.02 | 0.00 | 0.1  | 0.92 |
| G190Q | T69S_SS | 0   | 35  | 20   | 0.00 | 0.00 | 0.00 | NA   | 0.92 |
| Y318F | T69S_SS | 0   | 34  | 20   | 0.00 | 0.00 | 0.00 | NA   | 0.92 |
| K101N | T69S_SS | 0   | 32  | 20   | 0.00 | 0.00 | 0.00 | NA   | 0.93 |
| Y181V | Y115F   | 2   | 62  | 250  | 0.01 | 0.01 | 0.00 | 0.1  | 0.93 |
| V179T | M184V.I | 33  | 2   | 8820 | 0.00 | 0.00 | 0.00 | 0.1  | 0.93 |
| I178F | K70E    | 0   | 24  | 25   | 0.00 | 0.00 | 0.00 | NA   | 0.93 |
| L234I | K65R    | 1   | 23  | 399  | 0.00 | 0.00 | 0.00 | -0.1 | 0.93 |
| F227L | Y115F   | 6   | 207 | 243  | 0.01 | 0.01 | 0.01 | -0.1 | 0.93 |
| Y188H | K70E    | 0   | 23  | 25   | 0.00 | 0.00 | 0.00 | NA   | 0.94 |
| K103S | Y115F   | 5   | 175 | 245  | 0.01 | 0.01 | 0.01 | -0.1 | 0.94 |
| V179F | K70E    | 0   | 22  | 25   | 0.00 | 0.00 | 0.00 | NA   | 0.94 |
| V90I  | D67N    | 268 | 349 | 3674 | 0.06 | 0.06 | 0.00 | -0.1 | 0.94 |
| K238N | T215Y   | 15  | 21  | 3267 | 0.00 | 0.00 | 0.00 | -0.1 | 0.94 |
| K101N | M41L    | 17  | 15  | 4424 | 0.00 | 0.00 | 0.00 | 0.1  | 0.94 |
| V179D | Q151M   | 12  | 272 | 380  | 0.02 | 0.02 | 0.01 | 0.1  | 0.94 |
| G190C | M184IV  | 8   | 5   | 5177 | 0.00 | 0.00 | 0.00 | -0.1 | 0.95 |
| I178F | T69S_SS | 0   | 24  | 20   | 0.00 | 0.00 | 0.00 | NA   | 0.95 |
| L234I | T69S_SS | 0   | 24  | 20   | 0.00 | 0.00 | 0.00 | NA   | 0.95 |
| S105T | K70E    | 0   | 19  | 25   | 0.00 | 0.00 | 0.00 | NA   | 0.95 |
| Y188H | T69S_SS | 0   | 23  | 20   | 0.00 | 0.00 | 0.00 | NA   | 0.95 |
| Y232H | K70E    | 0   | 18  | 25   | 0.00 | 0.00 | 0.00 | NA   | 0.95 |
| V179F | T69S_SS | 0   | 22  | 20   | 0.00 | 0.00 | 0.00 | NA   | 0.95 |
| V90I  | Y115F   | 18  | 607 | 252  | 0.02 | 0.02 | 0.00 | -0.1 | 0.95 |
| G190C | K70E    | 0   | 16  | 25   | 0.00 | 0.00 | 0.00 | NA   | 0.95 |
| F227Y | K70E    | 0   | 16  | 25   | 0.00 | 0.00 | 0.00 | NA   | 0.95 |
| P236L | K70E    | 0   | 16  | 25   | 0.00 | 0.00 | 0.00 | NA   | 0.95 |
| S105T | T69S_SS | 0   | 19  | 20   | 0.00 | 0.00 | 0.00 | NA   | 0.96 |
| K223T | M184IV  | 36  | 21  | 5131 | 0.01 | 0.01 | 0.00 | 0.1  | 0.96 |

|       |         |     |     |      |      |      |      |     |      |
|-------|---------|-----|-----|------|------|------|------|-----|------|
| K103H | K70E    | 0   | 15  | 25   | 0.00 | 0.00 | 0.00 | NA  | 0.96 |
| Y232H | T69S_SS | 0   | 18  | 20   | 0.00 | 0.00 | 0.00 | NA  | 0.96 |
| Y188C | K70E    | 0   | 14  | 25   | 0.00 | 0.00 | 0.00 | NA  | 0.96 |
| H221C | K70E    | 0   | 14  | 25   | 0.00 | 0.00 | 0.00 | NA  | 0.96 |
| L234I | Q151M   | 1   | 23  | 376  | 0.00 | 0.00 | 0.00 | 0.0 | 0.96 |
| V106I | T69S_SS | 1   | 375 | 22   | 0.00 | 0.00 | 0.00 | 0.0 | 0.96 |
| F227Y | T69S_SS | 0   | 17  | 20   | 0.00 | 0.00 | 0.00 | NA  | 0.96 |
| P236L | T69S_SS | 0   | 16  | 20   | 0.00 | 0.00 | 0.00 | NA  | 0.96 |
| K103H | T69S_SS | 0   | 15  | 20   | 0.00 | 0.00 | 0.00 | NA  | 0.97 |
| Y188C | T69S_SS | 0   | 14  | 20   | 0.00 | 0.00 | 0.00 | NA  | 0.97 |
| H221C | T69S_SS | 0   | 14  | 20   | 0.00 | 0.00 | 0.00 | NA  | 0.97 |
| Y188H | Q151M   | 1   | 22  | 375  | 0.00 | 0.00 | 0.00 | 0.0 | 0.97 |
| V241M | T69S_SS | 0   | 13  | 20   | 0.00 | 0.00 | 0.00 | NA  | 0.97 |
| K102N | T215Y   | 15  | 21  | 3278 | 0.00 | 0.00 | 0.00 | 0.0 | 0.97 |
| K103T | K70E    | 0   | 10  | 25   | 0.00 | 0.00 | 0.00 | NA  | 0.97 |
| H221Y | M184IV  | 372 | 224 | 4618 | 0.07 | 0.07 | 0.00 | 0.0 | 0.97 |
| K102N | M41L    | 20  | 18  | 4430 | 0.00 | 0.00 | 0.00 | 0.0 | 0.97 |
| K102N | L74IV   | 9   | 28  | 1986 | 0.00 | 0.00 | 0.00 | 0.0 | 0.97 |
| K103T | T69S_SS | 0   | 10  | 20   | 0.00 | 0.00 | 0.00 | NA  | 0.98 |
| V179T | Y115F   | 1   | 34  | 273  | 0.00 | 0.00 | 0.00 | 0.0 | 0.98 |
| V241M | M184IV  | 8   | 5   | 5173 | 0.00 | 0.00 | 0.00 | 0.0 | 0.98 |
| H221C | V75MT   | 1   | 13  | 608  | 0.00 | 0.00 | 0.00 | 0.0 | 0.98 |
| Y318F | Y115F   | 1   | 33  | 251  | 0.00 | 0.00 | 0.00 | 0.0 | 0.99 |
| Y318F | T215F   | 6   | 28  | 1374 | 0.00 | 0.00 | 0.00 | 0.0 | 0.99 |
| Y181I | L210W   | 42  | 77  | 2937 | 0.01 | 0.01 | 0.00 | 0.0 | 1.00 |

\* Occurrences in the dataset of 9,564 isolates containing at least 1 NNRTI-selected mutation and at least 1 NRTI-selected mutation; only 1 isolate per patient was included in the analysis and sequences with mixtures at a given position were excluded from comparisons at that position. XY: isolates containing both mutations; X only: isolates containing mutation X but not mutation Y; Y only: isolates containing mutation Y but not mutation X.

† J: Jaccard similarity coefficients;  $J_{RAND}$ : expected value of the Jaccard similarity coefficient assuming Mutation X and Mutation Y occur independently based on a permutation procedure described in Methods;  $J_{SE}$ : the standard error of J; Z:  $(J - J_{RAND}) / J_{SE}$ . A negative Z score indicates a negative correlation. Z scores marked NA indicate zero sequences with both mutations; the p-value for these comparisons was calculated using Fisher's exact one-tailed test.
